# Supplementary material for: Single-Cell Molecular and Cellular Architecture of the Mouse Neurohypophysis
Source: eNeuro. 2020 Jan 16;7(1):ENEURO.0345-19.2019. doi: 10.1523/ENEURO.0345-19.2019 (PMC6984808; doi:10.1523/ENEURO.0345-19.2019)
Supplement: Extended Data Figure 1-2 — Complete list of normalized differentially expressed genes. A complete list of normalized differentially expressed genes that were expressed in at least 25% of the cells within between the two groups of cells. Download Figure 1-2, XLSX file. [file sup_enu-eN-NWR-0345-19-s07.xlsx]

## Sheet: differential_genes_report_per_c
cluster	gene	avg_logFC	p_val_adj	pct.1	pct.2	p_val
intermediate lobe cells	Pcsk2	3.61069	2.63526e-83	0.878	0.037	1.75392e-87
intermediate lobe cells	Scg2	1.96352	1.73089e-76	0.851	0.034	1.15201e-80
intermediate lobe cells	Resp18	2.02405	1.69698e-71	0.831	0.045	1.12944e-75
intermediate lobe cells	Snap25	1.87165	1.56619e-69	0.764	0.021	1.04239e-73
intermediate lobe cells	Chga	1.90522	2.73738e-67	0.797	0.039	1.82188e-71
intermediate lobe cells	Oacyl	2.20747	4.32986e-65	0.703	0.011	2.88177e-69
intermediate lobe cells	Bex2	2.01628	4.04943e-64	0.878	0.134	2.69513e-68
intermediate lobe cells	Pcsk1n	2.2476	1.23929e-63	0.946	0.271	8.24815e-68
intermediate lobe cells	Gnas	1.94195	7.80395e-62	0.986	0.532	5.19398e-66
intermediate lobe cells	Gria2	1.69801	1.05939e-61	0.676	0.011	7.05088e-66
intermediate lobe cells	Syt1	1.66	1.14794e-61	0.723	0.029	7.64019e-66
intermediate lobe cells	Ptprn	1.51769	1.03605e-60	0.669	0.013	6.8955e-65
intermediate lobe cells	Pomc	4.02972	2.04403e-60	0.986	0.589	1.36042e-64
intermediate lobe cells	Scg5	1.65493	1.57415e-59	0.804	0.084	1.04769e-63
intermediate lobe cells	5330417C22Rik	1.4314	1.95072e-55	0.662	0.024	1.29831e-59
intermediate lobe cells	Ly6h	1.60028	4.40837e-55	0.791	0.074	2.93403e-59
intermediate lobe cells	Meg3	1.94368	6.77415e-54	0.959	0.508	4.50859e-58
intermediate lobe cells	Ascl1	1.45832	4.26123e-51	0.601	0.018	2.83609e-55
intermediate lobe cells	Nap1l5	1.59314	6.12331e-51	0.682	0.05	4.07541e-55
intermediate lobe cells	Chgb	1.64036	9.63133e-51	0.628	0.029	6.4102e-55
intermediate lobe cells	Pabpc1l	1.25216	8.13145e-48	0.561	0.013	5.41195e-52
intermediate lobe cells	Syt4	1.30259	2.06088e-47	0.595	0.024	1.37164e-51
intermediate lobe cells	Alcam	1.52554	8.91845e-47	0.635	0.045	5.93574e-51
intermediate lobe cells	Sphkap	1.17096	3.06337e-45	0.527	0.011	2.03885e-49
intermediate lobe cells	Rit2	1.23791	4.99585e-45	0.554	0.018	3.32503e-49
intermediate lobe cells	Cpe	1.50075	2.32262e-44	0.811	0.174	1.54584e-48
intermediate lobe cells	Nr4a2	2.00764	5.66323e-44	0.642	0.066	3.7692e-48
intermediate lobe cells	Rorb	1.15236	2.1115e-39	0.514	0.021	1.40533e-43
intermediate lobe cells	Pde10a	1.50302	1.71926e-38	0.486	0.016	1.14426e-42
intermediate lobe cells	Fam183b	1.11866	1.79387e-38	0.486	0.016	1.19392e-42
intermediate lobe cells	Mcc	1.30642	3.85592e-38	0.635	0.079	2.56634e-42
intermediate lobe cells	Pnmal2	1.15775	6.79723e-38	0.588	0.061	4.52395e-42
intermediate lobe cells	Sez6l2	0.956616	9.40161e-38	0.473	0.013	6.25731e-42
intermediate lobe cells	Esm1	1.17998	1.80631e-37	0.466	0.011	1.2022e-41
intermediate lobe cells	Dner	1.07703	2.65323e-37	0.48	0.016	1.76588e-41
intermediate lobe cells	Calb1	1.2298	3.44338e-37	0.547	0.042	2.29176e-41
intermediate lobe cells	Ngfrap1	1.18586	5.80661e-35	0.764	0.187	3.86463e-39
intermediate lobe cells	Stmn3	0.934013	1.77117e-34	0.48	0.024	1.17882e-38
intermediate lobe cells	Vstm2l	0.98425	2.37725e-34	0.405	0.003	1.58219e-38
intermediate lobe cells	Wbp5	1.09942	8.07311e-33	0.878	0.337	5.37312e-37
intermediate lobe cells	Celf3	1.05575	3.18393e-32	0.412	0.011	2.11909e-36
intermediate lobe cells	Trp53i11	1.03185	7.58903e-32	0.52	0.047	5.05094e-36
intermediate lobe cells	Cplx2	0.946848	1.6911e-31	0.439	0.021	1.12552e-35
intermediate lobe cells	Rbfox3	0.977792	2.92243e-31	0.385	0.005	1.94505e-35
intermediate lobe cells	Nrxn1	0.950035	5.67864e-31	0.446	0.024	3.77946e-35
intermediate lobe cells	Cacna2d1	0.911314	3.3894e-30	0.412	0.016	2.25584e-34
intermediate lobe cells	Snhg11	1.27633	7.03904e-30	0.493	0.05	4.68488e-34
intermediate lobe cells	AW551984	0.992474	1.64414e-29	0.412	0.018	1.09427e-33
intermediate lobe cells	Dbpht2	0.954329	4.14326e-29	0.419	0.021	2.75758e-33
intermediate lobe cells	Rab26os	1.02702	7.42626e-28	0.757	0.213	4.9426e-32
intermediate lobe cells	Necab2	0.834738	1.11339e-27	0.331	0	7.41025e-32
intermediate lobe cells	Auts2	1.04552	1.20828e-27	0.642	0.132	8.04178e-32
intermediate lobe cells	Tmem158	0.856215	1.49785e-27	0.351	0.005	9.96906e-32
intermediate lobe cells	Nr4a1	1.12417	7.54761e-27	0.628	0.121	5.02337e-31
intermediate lobe cells	Smpd3	0.919883	1.42294e-26	0.399	0.024	9.4705e-31
intermediate lobe cells	Tuba1a	0.911684	2.88342e-26	0.736	0.192	1.91908e-30
intermediate lobe cells	Aplp1	0.89879	6.02467e-26	0.514	0.071	4.00977e-30
intermediate lobe cells	Grin1	0.738531	7.03632e-26	0.324	0.003	4.68307e-30
intermediate lobe cells	Pax7	0.834034	1.24863e-25	0.331	0.005	8.31035e-30
intermediate lobe cells	Peg3	1.09015	2.71005e-25	0.77	0.253	1.8037e-29
intermediate lobe cells	Baiap3	0.850528	3.22116e-25	0.378	0.021	2.14387e-29
intermediate lobe cells	Gdap1	0.816363	3.63737e-25	0.351	0.013	2.42088e-29
intermediate lobe cells	Spock2	0.766346	8.29343e-25	0.385	0.024	5.51976e-29
intermediate lobe cells	Epcam	0.852831	2.27997e-24	0.466	0.055	1.51745e-28
intermediate lobe cells	Dclk1	0.884056	1.15601e-23	0.439	0.047	7.69392e-28
intermediate lobe cells	Dynll2	0.907462	2.08087e-23	0.689	0.184	1.38494e-27
intermediate lobe cells	Amph	0.729247	3.78076e-23	0.324	0.011	2.51631e-27
intermediate lobe cells	Caly	0.787709	4.16623e-23	0.331	0.013	2.77287e-27
intermediate lobe cells	Tmem130	0.713021	5.13667e-23	0.284	0	3.41875e-27
intermediate lobe cells	Gng2	0.836143	5.51691e-23	0.486	0.068	3.67182e-27
intermediate lobe cells	Limch1	0.842905	8.04705e-23	0.405	0.037	5.35577e-27
intermediate lobe cells	Ccdc109b	0.708789	8.86709e-23	0.331	0.013	5.90156e-27
intermediate lobe cells	Gprasp2	0.901714	1.52381e-22	0.52	0.092	1.01418e-26
intermediate lobe cells	Celf4	0.81218	2.00689e-22	0.466	0.066	1.3357e-26
intermediate lobe cells	Usp29	0.795612	3.05433e-22	0.412	0.045	2.03283e-26
intermediate lobe cells	Pak3	0.816126	5.47948e-22	0.365	0.029	3.64691e-26
intermediate lobe cells	Tbx19	0.732577	1.31777e-21	0.324	0.016	8.77049e-26
intermediate lobe cells	Unc80	0.763945	2.78694e-21	0.453	0.061	1.85487e-25
intermediate lobe cells	Shank1	0.716495	2.8294e-21	0.304	0.011	1.88313e-25
intermediate lobe cells	Dmpk	0.627324	5.90185e-21	0.291	0.008	3.92802e-25
intermediate lobe cells	Egr4	0.868934	8.22905e-21	0.27	0.003	5.4769e-25
intermediate lobe cells	Ap3b2	0.586767	8.26863e-21	0.284	0.005	5.50325e-25
intermediate lobe cells	Srrm3	0.665947	9.26792e-21	0.311	0.013	6.16833e-25
intermediate lobe cells	Scg3	0.747198	9.54174e-21	0.297	0.011	6.35058e-25
intermediate lobe cells	Chst8	0.704293	9.63346e-21	0.311	0.013	6.41162e-25
intermediate lobe cells	Slitrk6	0.706776	1.10715e-20	0.318	0.016	7.36874e-25
intermediate lobe cells	Hap1	0.847401	1.14697e-20	0.466	0.074	7.63372e-25
intermediate lobe cells	Pld3	0.852174	1.35035e-20	0.581	0.134	8.98733e-25
intermediate lobe cells	Bex4	0.843651	3.75953e-20	0.52	0.103	2.50218e-24
intermediate lobe cells	Dlg2	0.580256	3.76523e-20	0.264	0.003	2.50598e-24
intermediate lobe cells	1700086L19Rik	0.728207	4.70209e-20	0.311	0.016	3.12951e-24
intermediate lobe cells	Actl6b	0.622691	6.07136e-20	0.27	0.005	4.04084e-24
intermediate lobe cells	Six6	0.624577	6.54141e-20	0.399	0.047	4.35368e-24
intermediate lobe cells	Sv2a	0.747446	7.5598e-20	0.358	0.034	5.03148e-24
intermediate lobe cells	Gulo	0.695819	9.57769e-20	0.27	0.005	6.3745e-24
intermediate lobe cells	Rundc3a	0.694109	1.06985e-19	0.338	0.026	7.12044e-24
intermediate lobe cells	Pcdh17	0.694272	2.43283e-19	0.399	0.047	1.61919e-23
intermediate lobe cells	Cbarp	0.71046	3.60862e-19	0.419	0.061	2.40174e-23
intermediate lobe cells	Bex1	0.783512	4.02603e-19	0.601	0.161	2.67956e-23
intermediate lobe cells	Lrp11	0.677163	4.14259e-19	0.331	0.026	2.75713e-23
intermediate lobe cells	Prox1	0.686955	4.68336e-19	0.297	0.016	3.11705e-23
intermediate lobe cells	Gpx3	0.753618	1.8124e-18	0.466	0.084	1.20625e-22
intermediate lobe cells	Camk2n1	0.983249	3.06684e-18	0.527	0.126	2.04116e-22
intermediate lobe cells	Smim22	0.663019	3.26536e-18	0.331	0.029	2.17329e-22
intermediate lobe cells	Uchl1	0.726838	4.24751e-18	0.324	0.029	2.82696e-22
intermediate lobe cells	Ncam1	0.73417	5.69835e-18	0.52	0.111	3.79258e-22
intermediate lobe cells	Nsg2	0.642467	6.24447e-18	0.297	0.018	4.15605e-22
intermediate lobe cells	Cxxc5	0.684218	7.07051e-17	0.412	0.068	4.70583e-21
intermediate lobe cells	Rgag4	0.702937	7.59956e-17	0.284	0.018	5.05794e-21
intermediate lobe cells	Cnot3	1.47278	8.35558e-17	0.959	0.729	5.56112e-21
intermediate lobe cells	Syp	0.594592	9.0969e-17	0.284	0.018	6.05451e-21
intermediate lobe cells	Arc	0.865516	1.2363e-16	0.338	0.037	8.22831e-21
intermediate lobe cells	Gm1673	0.721621	1.25556e-16	0.534	0.132	8.35645e-21
intermediate lobe cells	Clu	0.716208	1.42677e-16	0.554	0.147	9.496e-21
intermediate lobe cells	Scn2a1	0.660349	1.43594e-16	0.297	0.024	9.55703e-21
intermediate lobe cells	Syt7	0.63363	1.69635e-16	0.27	0.016	1.12902e-20
intermediate lobe cells	Soga3	0.580143	1.84804e-16	0.27	0.016	1.22998e-20
intermediate lobe cells	Mien1	0.727513	4.56592e-16	0.52	0.129	3.03888e-20
intermediate lobe cells	Unc5a	0.608589	4.76047e-16	0.257	0.013	3.16837e-20
intermediate lobe cells	Pja2	0.733839	5.95654e-16	0.595	0.179	3.96442e-20
intermediate lobe cells	Stmn1	0.666154	7.72021e-16	0.466	0.105	5.13824e-20
intermediate lobe cells	4930447C04Rik	0.760692	7.98897e-16	0.345	0.045	5.31712e-20
intermediate lobe cells	Rab3b	0.603221	8.91374e-16	0.264	0.016	5.93261e-20
intermediate lobe cells	Tmc4	0.592636	1.45425e-15	0.351	0.047	9.67887e-20
intermediate lobe cells	Ank3	0.740837	1.60563e-15	0.378	0.063	1.06864e-19
intermediate lobe cells	Gprasp1	0.691633	2.29386e-15	0.581	0.171	1.52669e-19
intermediate lobe cells	B630019K06Rik	0.655326	2.32572e-15	0.304	0.032	1.5479e-19
intermediate lobe cells	Zdbf2	0.62928	2.50805e-15	0.304	0.032	1.66925e-19
intermediate lobe cells	Atpif1	0.788258	3.50108e-15	0.892	0.505	2.33017e-19
intermediate lobe cells	Prune2	0.620647	3.83154e-15	0.338	0.042	2.55011e-19
intermediate lobe cells	C1qtnf4	0.646387	6.62717e-15	0.392	0.068	4.41076e-19
intermediate lobe cells	Rab27a	0.611454	7.25384e-15	0.284	0.026	4.82785e-19
intermediate lobe cells	Fos	0.721706	7.28821e-15	0.797	0.403	4.85072e-19
intermediate lobe cells	Arf3	0.664558	1.18097e-14	0.608	0.187	7.86005e-19
intermediate lobe cells	Nelfcd	0.677101	1.39309e-14	0.318	0.039	9.27184e-19
intermediate lobe cells	Gm5914	0.644643	1.57649e-14	0.392	0.071	1.04925e-18
intermediate lobe cells	Dnajc9	0.658679	1.6242e-14	0.432	0.089	1.081e-18
intermediate lobe cells	1700023F06Rik	0.617297	3.08215e-14	0.304	0.037	2.05135e-18
intermediate lobe cells	Pam	0.755583	6.73591e-14	0.777	0.347	4.48314e-18
intermediate lobe cells	Creb3l2	0.671817	9.64958e-14	0.412	0.089	6.42235e-18
intermediate lobe cells	Etv1	0.652602	1.04905e-13	0.642	0.221	6.98204e-18
intermediate lobe cells	Snhg9	0.727437	2.22135e-13	0.682	0.279	1.47843e-17
intermediate lobe cells	Maged1	0.697672	2.34658e-13	0.757	0.321	1.56178e-17
intermediate lobe cells	Zfhx2	0.558781	6.45743e-13	0.311	0.042	4.29779e-17
intermediate lobe cells	Gadd45b	0.627964	6.90394e-13	0.365	0.066	4.59497e-17
intermediate lobe cells	Tmem59l	0.598105	7.53461e-13	0.297	0.039	5.01472e-17
intermediate lobe cells	Gem	0.664798	9.58608e-13	0.277	0.032	6.38008e-17
intermediate lobe cells	Tenm4	0.596989	1.1261e-12	0.338	0.058	7.49482e-17
intermediate lobe cells	Hdgfrp3	0.485937	1.18433e-12	0.264	0.026	7.88239e-17
intermediate lobe cells	Ubqln2	0.56803	1.24977e-12	0.48	0.126	8.31792e-17
intermediate lobe cells	Zmynd8	0.587823	1.31911e-12	0.507	0.142	8.77944e-17
intermediate lobe cells	Pkib	0.633093	1.44749e-12	0.466	0.121	9.63386e-17
intermediate lobe cells	Ccnd2	0.658261	1.61972e-12	0.838	0.45	1.07801e-16
intermediate lobe cells	Sag	0.673349	2.39633e-12	0.351	0.063	1.59489e-16
intermediate lobe cells	Nrxn2	0.602856	2.44224e-12	0.365	0.068	1.62545e-16
intermediate lobe cells	Stxbp1	0.512718	3.31753e-12	0.304	0.045	2.20801e-16
intermediate lobe cells	Itm2c	0.688749	3.66203e-12	0.757	0.379	2.43729e-16
intermediate lobe cells	Zwint	0.649608	3.84655e-12	0.52	0.161	2.5601e-16
intermediate lobe cells	Megf11	0.533866	4.29458e-12	0.264	0.029	2.85829e-16
intermediate lobe cells	Egr1	0.74229	5.11894e-12	0.682	0.292	3.40695e-16
intermediate lobe cells	Ociad2	0.592454	1.19351e-11	0.264	0.032	7.94349e-16
intermediate lobe cells	Rab27b	0.525428	1.46598e-11	0.291	0.042	9.75691e-16
intermediate lobe cells	Plxnb1	0.541078	1.64877e-11	0.318	0.053	1.09735e-15
intermediate lobe cells	Mapk8ip1	0.525953	3.03329e-11	0.345	0.066	2.01883e-15
intermediate lobe cells	Btg2	0.664299	3.12556e-11	0.797	0.424	2.08024e-15
intermediate lobe cells	Hyou1	0.898326	4.75707e-11	0.453	0.129	3.1661e-15
intermediate lobe cells	Ocrl	0.616737	5.35466e-11	0.432	0.116	3.56383e-15
intermediate lobe cells	Gabra2	0.581742	5.73541e-11	0.27	0.037	3.81725e-15
intermediate lobe cells	Cxxc4	0.503662	6.1951e-11	0.27	0.037	4.12319e-15
intermediate lobe cells	Dusp1	0.571157	6.59002e-11	0.669	0.279	4.38603e-15
intermediate lobe cells	Heg1	0.527628	6.59245e-11	0.399	0.095	4.38765e-15
intermediate lobe cells	Hdac11	0.555107	1.05089e-10	0.345	0.074	6.99428e-15
intermediate lobe cells	Sparcl1	0.543375	1.05926e-10	0.399	0.095	7.05001e-15
intermediate lobe cells	Six1	0.468403	1.15031e-10	0.264	0.034	7.65596e-15
intermediate lobe cells	Pgam1	0.58675	1.24204e-10	0.507	0.168	8.26647e-15
intermediate lobe cells	Cd24a	0.432047	1.55683e-10	0.385	0.089	1.03616e-14
intermediate lobe cells	Gabarapl1	0.620885	1.72543e-10	0.615	0.25	1.14837e-14
intermediate lobe cells	2410002F23Rik	0.493615	1.85821e-10	0.365	0.079	1.23675e-14
intermediate lobe cells	Dnajb1	0.841808	2.88481e-10	0.52	0.184	1.92e-14
intermediate lobe cells	Atp5e	0.561855	3.96406e-10	0.899	0.679	2.63831e-14
intermediate lobe cells	Ptbp3	0.431712	1.11813e-09	0.453	0.126	7.44178e-14
intermediate lobe cells	Mast4	0.382593	1.70038e-09	0.378	0.095	1.1317e-13
intermediate lobe cells	G3bp2	0.674784	1.89468e-09	0.608	0.266	1.26102e-13
intermediate lobe cells	Msx1	0.500296	2.36131e-09	0.264	0.042	1.57159e-13
intermediate lobe cells	Dstn	0.551701	3.06288e-09	0.743	0.371	2.03852e-13
intermediate lobe cells	Nsa2	0.669146	3.13653e-09	0.716	0.368	2.08754e-13
intermediate lobe cells	Uri1	0.452141	3.86041e-09	0.27	0.045	2.56932e-13
intermediate lobe cells	Ahi1	0.516733	5.32998e-09	0.351	0.084	3.54741e-13
intermediate lobe cells	Gnl3l	0.492947	5.5021e-09	0.358	0.089	3.66197e-13
intermediate lobe cells	Cmip	0.5483	6.10868e-09	0.432	0.134	4.06567e-13
intermediate lobe cells	Tspyl4	0.429153	6.96408e-09	0.297	0.058	4.63499e-13
intermediate lobe cells	2210013O21Rik	0.478537	7.063e-09	0.385	0.103	4.70083e-13
intermediate lobe cells	Nbea	0.426674	8.93556e-09	0.27	0.047	5.94712e-13
intermediate lobe cells	Tomm34	0.480246	9.12148e-09	0.351	0.087	6.07087e-13
intermediate lobe cells	1500011B03Rik	0.496045	1.00034e-08	0.297	0.061	6.65785e-13
intermediate lobe cells	Ppp3ca	0.440475	1.09909e-08	0.534	0.187	7.31508e-13
intermediate lobe cells	Zer1	0.507564	1.18013e-08	0.291	0.058	7.85447e-13
intermediate lobe cells	Mcf2l	0.406721	1.32839e-08	0.284	0.053	8.84119e-13
intermediate lobe cells	Prkar1a	0.542251	1.45862e-08	0.669	0.311	9.70793e-13
intermediate lobe cells	Rasa4	0.466368	1.68506e-08	0.291	0.058	1.1215e-12
intermediate lobe cells	Nme1	0.594619	2.43135e-08	0.642	0.282	1.61821e-12
intermediate lobe cells	Vamp2	0.527723	4.67168e-08	0.412	0.129	3.10927e-12
intermediate lobe cells	Hmgn3	0.565106	5.12891e-08	0.635	0.292	3.41358e-12
intermediate lobe cells	Cirbp	0.481005	5.34115e-08	0.554	0.213	3.55484e-12
intermediate lobe cells	Tob1	0.517768	5.93912e-08	0.466	0.161	3.95282e-12
intermediate lobe cells	Tspan13	0.386244	1.29048e-07	0.48	0.161	8.5889e-12
intermediate lobe cells	Negr1	0.49788	1.53949e-07	0.385	0.113	1.02462e-11
intermediate lobe cells	Plagl1	0.557574	1.76739e-07	0.419	0.137	1.1763e-11
intermediate lobe cells	Copa	0.507861	1.99046e-07	0.554	0.224	1.32477e-11
intermediate lobe cells	Chd3	0.451358	2.54098e-07	0.473	0.168	1.69117e-11
intermediate lobe cells	R3hdm1	0.502335	3.16632e-07	0.507	0.195	2.10737e-11
intermediate lobe cells	Cers4	0.529909	3.49475e-07	0.412	0.137	2.32596e-11
intermediate lobe cells	Hspa4l	0.545954	4.16234e-07	0.338	0.095	2.77028e-11
intermediate lobe cells	Uvssa	0.422481	4.23243e-07	0.338	0.089	2.81692e-11
intermediate lobe cells	Ndn	0.450862	4.61223e-07	0.392	0.126	3.06971e-11
intermediate lobe cells	Madd	0.372404	5.10838e-07	0.331	0.084	3.39992e-11
intermediate lobe cells	Krt10	0.396311	5.15039e-07	0.338	0.089	3.42788e-11
intermediate lobe cells	Nav1	0.414917	5.23984e-07	0.324	0.089	3.48741e-11
intermediate lobe cells	Arl3	0.508398	5.84184e-07	0.446	0.161	3.88808e-11
intermediate lobe cells	Vat1	0.379202	6.23883e-07	0.304	0.074	4.1523e-11
intermediate lobe cells	Mrfap1	0.534356	6.26168e-07	0.703	0.382	4.16751e-11
intermediate lobe cells	1110065P20Rik	0.470705	6.40254e-07	0.324	0.087	4.26126e-11
intermediate lobe cells	Hsp90aa1	0.615077	7.1199e-07	0.777	0.445	4.7387e-11
intermediate lobe cells	Il6ra	0.429448	8.1007e-07	0.291	0.068	5.39148e-11
intermediate lobe cells	Eid1	0.43551	9.80691e-07	0.419	0.142	6.52706e-11
intermediate lobe cells	Srcin1	0.467368	1.04529e-06	0.297	0.074	6.957e-11
intermediate lobe cells	Cisd3	0.483798	1.04987e-06	0.345	0.1	6.98752e-11
intermediate lobe cells	Chek2	0.404701	1.3044e-06	0.27	0.061	8.6815e-11
intermediate lobe cells	Gm20721	0.394398	1.31551e-06	0.264	0.058	8.75547e-11
intermediate lobe cells	Deb1	0.476388	1.61048e-06	0.338	0.097	1.07186e-10
intermediate lobe cells	Spint2	0.339664	1.74541e-06	0.514	0.195	1.16167e-10
intermediate lobe cells	Ythdc1	0.48471	1.78793e-06	0.351	0.108	1.18997e-10
intermediate lobe cells	Wdr6	0.525974	1.97993e-06	0.426	0.155	1.31776e-10
intermediate lobe cells	Ptov1	0.430967	2.65756e-06	0.439	0.158	1.76876e-10
intermediate lobe cells	Rpl22l1	0.3989	2.78064e-06	0.912	0.718	1.85068e-10
intermediate lobe cells	Fosb	0.61555	2.91205e-06	0.446	0.171	1.93814e-10
intermediate lobe cells	Fndc3a	0.447557	2.9487e-06	0.399	0.137	1.96253e-10
intermediate lobe cells	Chchd2	0.437505	3.37397e-06	0.865	0.613	2.24557e-10
intermediate lobe cells	Svip	0.446185	3.7923e-06	0.264	0.061	2.52399e-10
intermediate lobe cells	Gfpt1	0.367952	4.23124e-06	0.399	0.129	2.81613e-10
intermediate lobe cells	St3gal5	0.423644	4.51904e-06	0.48	0.179	3.00768e-10
intermediate lobe cells	Stk25	0.399228	4.97206e-06	0.297	0.079	3.30919e-10
intermediate lobe cells	Cbx6	0.447027	4.99638e-06	0.385	0.129	3.32538e-10
intermediate lobe cells	Golga4	0.497888	5.64005e-06	0.345	0.105	3.75378e-10
intermediate lobe cells	Pcp4	0.311823	6.57628e-06	0.5	0.197	4.37689e-10
intermediate lobe cells	Morf4l2	0.484552	6.7636e-06	0.642	0.329	4.50157e-10
intermediate lobe cells	Lsm6	0.350043	7.18112e-06	0.514	0.203	4.77945e-10
intermediate lobe cells	Cxx1a	0.462416	1.14964e-05	0.534	0.229	7.65154e-10
intermediate lobe cells	Hspa5	0.499365	1.2328e-05	0.703	0.382	8.20498e-10
intermediate lobe cells	Atp6v1b2	0.353871	1.45813e-05	0.324	0.095	9.70466e-10
intermediate lobe cells	Rab3a	0.316771	1.55786e-05	0.27	0.068	1.03685e-09
intermediate lobe cells	Cspp1	0.521447	1.81767e-05	0.372	0.126	1.20977e-09
intermediate lobe cells	Copz2	0.401701	1.8442e-05	0.318	0.095	1.22742e-09
intermediate lobe cells	Zfhx4	0.419792	1.84844e-05	0.365	0.126	1.23025e-09
intermediate lobe cells	Nktr	0.451169	1.85347e-05	0.655	0.334	1.23359e-09
intermediate lobe cells	Gnao1	0.360242	2.28611e-05	0.257	0.063	1.52154e-09
intermediate lobe cells	Calm1	0.390584	2.31959e-05	0.845	0.545	1.54382e-09
intermediate lobe cells	Klhdc2	0.377502	2.43256e-05	0.27	0.071	1.61901e-09
intermediate lobe cells	Ywhaq	0.39423	2.82878e-05	0.642	0.305	1.88271e-09
intermediate lobe cells	Ids	0.367266	3.26753e-05	0.291	0.082	2.17473e-09
intermediate lobe cells	Sipa1l1	0.40566	3.28058e-05	0.277	0.076	2.18342e-09
intermediate lobe cells	Epm2aip1	0.345998	3.38369e-05	0.277	0.074	2.25204e-09
intermediate lobe cells	Tmx4	0.370035	3.44012e-05	0.432	0.161	2.2896e-09
intermediate lobe cells	Anp32e	0.41354	3.49877e-05	0.318	0.097	2.32863e-09
intermediate lobe cells	Snhg20	0.408017	4.26646e-05	0.5	0.205	2.83958e-09
intermediate lobe cells	R3hdm2	0.389136	4.55229e-05	0.297	0.087	3.02981e-09
intermediate lobe cells	Rufy3	0.341849	4.75255e-05	0.392	0.139	3.1631e-09
intermediate lobe cells	Acp1	0.316053	5.99004e-05	0.412	0.15	3.98672e-09
intermediate lobe cells	Tmem38a	0.287871	6.8633e-05	0.257	0.066	4.56792e-09
intermediate lobe cells	Cdc42bpa	0.385924	7.95819e-05	0.291	0.087	5.29663e-09
intermediate lobe cells	Golgb1	0.47153	9.20411e-05	0.486	0.216	6.12586e-09
intermediate lobe cells	Hdgf	0.453914	0.000103781	0.385	0.147	6.90723e-09
intermediate lobe cells	Fundc2	0.411139	0.000120378	0.385	0.145	8.01188e-09
intermediate lobe cells	Tmem263	0.35492	0.000133734	0.264	0.071	8.90077e-09
intermediate lobe cells	Brwd1	0.374226	0.000134748	0.277	0.082	8.96828e-09
intermediate lobe cells	Hsp90ab1	0.37917	0.000136116	0.932	0.697	9.05929e-09
intermediate lobe cells	Rapgef3	0.276955	0.000160175	0.331	0.108	1.06606e-08
intermediate lobe cells	Nenf	0.329494	0.000183413	0.574	0.261	1.22072e-08
intermediate lobe cells	9330020H09Rik	0.336886	0.000192423	0.257	0.068	1.28068e-08
intermediate lobe cells	Nfe2l1	0.385473	0.000209089	0.399	0.155	1.3916e-08
intermediate lobe cells	Psip1	0.422265	0.00020971	0.318	0.105	1.39574e-08
intermediate lobe cells	Fam114a2	0.36901	0.000210207	0.277	0.084	1.39905e-08
intermediate lobe cells	Sox4	0.458416	0.000242309	0.385	0.15	1.6127e-08
intermediate lobe cells	Faim2	0.27276	0.000309242	0.277	0.082	2.05818e-08
intermediate lobe cells	Pabpc4	0.399162	0.000336552	0.365	0.134	2.23994e-08
intermediate lobe cells	Tmem106c	0.376903	0.00036058	0.304	0.1	2.39987e-08
intermediate lobe cells	Btf3l4	0.356556	0.000642836	0.412	0.168	4.27844e-08
intermediate lobe cells	Prdx2	0.400856	0.000674752	0.581	0.308	4.49086e-08
intermediate lobe cells	Jmjd1c	0.316989	0.000703859	0.405	0.161	4.68459e-08
intermediate lobe cells	Cadps2	0.4062	0.000729352	0.257	0.076	4.85426e-08
intermediate lobe cells	Atp6v0e2	0.27842	0.000760533	0.277	0.084	5.06178e-08
intermediate lobe cells	Tnrc6b	0.327151	0.00080511	0.493	0.218	5.35847e-08
intermediate lobe cells	Tcf25	0.344165	0.000992626	0.547	0.263	6.6065e-08
intermediate lobe cells	Ctbp1	0.412676	0.00104053	0.297	0.1	6.92533e-08
intermediate lobe cells	Arfgap1	0.338515	0.00105639	0.27	0.084	7.03091e-08
intermediate lobe cells	Calm2	0.320078	0.00116787	0.919	0.718	7.77286e-08
intermediate lobe cells	Cox17	0.352839	0.00121445	0.777	0.5	8.08286e-08
intermediate lobe cells	Numa1	0.281307	0.00148921	0.284	0.092	9.91152e-08
intermediate lobe cells	Rtn1	0.331937	0.00167716	0.297	0.103	1.11625e-07
intermediate lobe cells	Ptp4a1	0.362433	0.00171829	0.324	0.118	1.14362e-07
intermediate lobe cells	Selm	0.30643	0.00181489	0.595	0.282	1.20791e-07
intermediate lobe cells	Ndufa1	0.396518	0.00202316	0.561	0.287	1.34653e-07
intermediate lobe cells	Smarca2	0.283847	0.00205015	0.446	0.189	1.36449e-07
intermediate lobe cells	Casc4	0.384728	0.00244625	0.27	0.087	1.62812e-07
intermediate lobe cells	Vkorc1	0.341161	0.00244706	0.324	0.121	1.62866e-07
intermediate lobe cells	Sfxn1	0.262886	0.00253181	0.27	0.087	1.68506e-07
intermediate lobe cells	Ptms	0.401268	0.00280485	0.514	0.255	1.86679e-07
intermediate lobe cells	Arfgef1	0.301534	0.00319796	0.331	0.124	2.12842e-07
intermediate lobe cells	Romo1	0.352723	0.0032554	0.73	0.405	2.16666e-07
intermediate lobe cells	Chchd10	0.312776	0.00334334	0.52	0.245	2.22518e-07
intermediate lobe cells	Clcn3	0.303099	0.00340721	0.446	0.2	2.26769e-07
intermediate lobe cells	Amz2	0.334075	0.00342707	0.277	0.092	2.28091e-07
intermediate lobe cells	Nono	0.344765	0.00355882	0.507	0.237	2.3686e-07
intermediate lobe cells	Odc1	0.576336	0.00373741	0.48	0.253	2.48746e-07
intermediate lobe cells	Prnp	0.310501	0.00375322	0.514	0.25	2.49798e-07
intermediate lobe cells	Zfp638	0.304388	0.00384403	0.304	0.108	2.55843e-07
intermediate lobe cells	Zfp560	0.352939	0.00385816	0.257	0.084	2.56783e-07
intermediate lobe cells	Impact	0.362645	0.00535108	0.331	0.129	3.56145e-07
intermediate lobe cells	Mga	0.354385	0.00543928	0.365	0.15	3.62015e-07
intermediate lobe cells	Tceal3	0.343814	0.00571624	0.257	0.087	3.80449e-07
intermediate lobe cells	Cxx1b	0.306967	0.00652754	0.284	0.1	4.34446e-07
intermediate lobe cells	Tma7	0.360199	0.00759421	0.784	0.511	5.05438e-07
intermediate lobe cells	Phip	0.269878	0.00881368	0.507	0.239	5.86601e-07
intermediate lobe cells	Mettl1	0.275031	0.00998771	0.277	0.095	6.6474e-07
intermediate lobe cells	Hnrnph3	0.281968	0.0107401	0.297	0.111	7.14818e-07
intermediate lobe cells	Ergic1	0.325032	0.0107767	0.27	0.092	7.17249e-07
intermediate lobe cells	Chd4	0.368952	0.0111307	0.473	0.234	7.40809e-07
intermediate lobe cells	1110001J03Rik	0.362365	0.0114043	0.291	0.108	7.59025e-07
intermediate lobe cells	Snhg18	0.329838	0.0134332	0.385	0.166	8.94057e-07
intermediate lobe cells	Atf4	0.308194	0.013445	0.378	0.161	8.94839e-07
intermediate lobe cells	Pnrc1	0.393398	0.0144274	0.399	0.182	9.60228e-07
intermediate lobe cells	Ndufv3	0.349842	0.0162844	0.723	0.432	1.08382e-06
intermediate lobe cells	Ivd	0.298983	0.0164386	0.257	0.087	1.09408e-06
intermediate lobe cells	Jund	0.381514	0.0168649	0.527	0.292	1.12246e-06
intermediate lobe cells	Snrpn	0.331199	0.0170883	0.291	0.111	1.13732e-06
intermediate lobe cells	Ndufa5	0.327625	0.017216	0.547	0.284	1.14582e-06
intermediate lobe cells	Tmcc1	0.283009	0.0195615	0.311	0.118	1.30193e-06
intermediate lobe cells	Odf2	0.290858	0.0200931	0.27	0.095	1.33731e-06
intermediate lobe cells	Pcm1	0.331695	0.0234077	0.412	0.187	1.55792e-06
intermediate lobe cells	Gabarapl2	0.302905	0.024354	0.601	0.353	1.6209e-06
intermediate lobe cells	Ndufb10	0.30638	0.0262552	0.459	0.218	1.74743e-06
intermediate lobe cells	Mrps33	0.366533	0.0270881	0.507	0.268	1.80287e-06
intermediate lobe cells	Hnrnpab	0.323932	0.0275777	0.345	0.15	1.83545e-06
intermediate lobe cells	Eprs	0.288034	0.0291126	0.365	0.155	1.93761e-06
intermediate lobe cells	Dgkz	0.339133	0.029687	0.257	0.092	1.97584e-06
intermediate lobe cells	Copz1	0.274431	0.0296936	0.297	0.116	1.97628e-06
intermediate lobe cells	Immp1l	0.271215	0.0302467	0.291	0.111	2.01309e-06
intermediate lobe cells	Calr	0.31923	0.0328382	0.743	0.432	2.18557e-06
intermediate lobe cells	Aes	0.302328	0.0396949	0.52	0.274	2.64192e-06
intermediate lobe cells	Pura	0.349921	0.0413361	0.581	0.329	2.75116e-06
intermediate lobe cells	Canx	0.329311	0.0426057	0.635	0.384	2.83566e-06
intermediate lobe cells	Pcdhga12	0.311696	0.04612	0.284	0.108	3.06955e-06
intermediate lobe cells	Usp9x	0.290579	0.0535072	0.446	0.216	3.56121e-06
intermediate lobe cells	Map2	0.296816	0.0568945	0.459	0.224	3.78665e-06
intermediate lobe cells	Hnrnpa1	0.317447	0.0614628	0.588	0.321	4.0907e-06
intermediate lobe cells	Rrp1	0.277274	0.0649966	0.27	0.105	4.3259e-06
intermediate lobe cells	Tceal8	0.281767	0.0694954	0.453	0.224	4.62532e-06
intermediate lobe cells	Cacybp	0.289171	0.0738458	0.277	0.108	4.91486e-06
intermediate lobe cells	Cbx3	0.320588	0.0748128	0.622	0.361	4.97922e-06
intermediate lobe cells	Sar1a	0.261102	0.0797857	0.297	0.121	5.3102e-06
intermediate lobe cells	Tubb4b	0.300841	0.0805381	0.372	0.171	5.36027e-06
intermediate lobe cells	Atp6v1d	0.299843	0.0806261	0.304	0.126	5.36613e-06
intermediate lobe cells	Msi2	0.337617	0.0845222	0.568	0.308	5.62544e-06
intermediate lobe cells	Rp9	0.268161	0.113233	0.345	0.153	7.53632e-06
intermediate lobe cells	Tia1	0.273712	0.124555	0.5	0.263	8.28988e-06
intermediate lobe cells	Dpm3	0.255854	0.129838	0.547	0.292	8.64144e-06
intermediate lobe cells	Cux1	0.273292	0.143892	0.277	0.111	9.57681e-06
intermediate lobe cells	Nbeal1	0.256301	0.145948	0.324	0.139	9.71371e-06
intermediate lobe cells	Matr3	0.386564	0.154827	0.52	0.303	1.03046e-05
intermediate lobe cells	Hint2	0.270044	0.157069	0.358	0.166	1.04539e-05
intermediate lobe cells	Atp5l	0.266703	0.163591	0.865	0.671	1.08879e-05
intermediate lobe cells	Taok2	0.254491	0.163787	0.345	0.153	1.0901e-05
intermediate lobe cells	Ndufa11	0.263145	0.166602	0.574	0.321	1.10883e-05
intermediate lobe cells	Sec61b	0.324374	0.194479	0.764	0.492	1.29437e-05
intermediate lobe cells	Surf4	0.31174	0.206601	0.324	0.145	1.37505e-05
intermediate lobe cells	Slc22a17	0.258025	0.226564	0.385	0.189	1.50791e-05
intermediate lobe cells	Morn2	0.312807	0.251067	0.277	0.118	1.67099e-05
intermediate lobe cells	Eif3a	0.28183	0.268252	0.527	0.303	1.78537e-05
intermediate lobe cells	Mat2a	0.359317	0.294017	0.642	0.426	1.95685e-05
intermediate lobe cells	Atp5b	0.300065	0.300634	0.635	0.389	2.00089e-05
intermediate lobe cells	Gnaz	0.350257	0.309004	0.412	0.218	2.0566e-05
intermediate lobe cells	Msi1	0.316249	0.326877	0.264	0.111	2.17555e-05
intermediate lobe cells	Smim10l1	0.322609	0.344697	0.365	0.182	2.29416e-05
intermediate lobe cells	Psmd2	0.256921	0.357558	0.297	0.132	2.37976e-05
intermediate lobe cells	Prrc2a	0.270274	0.360799	0.311	0.139	2.40132e-05
intermediate lobe cells	Selk	0.264811	0.509332	0.703	0.463	3.3899e-05
intermediate lobe cells	Rpn1	0.269019	0.520135	0.392	0.197	3.4618e-05
intermediate lobe cells	Ckb	0.258522	0.540648	0.541	0.313	3.59832e-05
intermediate lobe cells	Armcx2	0.266973	0.590966	0.264	0.111	3.93322e-05
intermediate lobe cells	Rab2a	0.280402	0.625252	0.439	0.232	4.16141e-05
intermediate lobe cells	Psma7	0.254191	0.706982	0.554	0.311	4.70537e-05
intermediate lobe cells	Slc38a1	0.290938	0.713334	0.257	0.111	4.74765e-05
intermediate lobe cells	Zbtb7a	0.264466	0.720679	0.412	0.213	4.79653e-05
intermediate lobe cells	Anapc5	0.254337	0.72703	0.372	0.187	4.8388e-05
intermediate lobe cells	Trim2	0.271897	0.784717	0.703	0.461	5.22274e-05
intermediate lobe cells	Ubn2	0.266605	0.808329	0.378	0.197	5.37989e-05
intermediate lobe cells	Tsn	0.293547	0.877287	0.345	0.171	5.83885e-05
intermediate lobe cells	Arf4	0.341062	0.901833	0.507	0.289	6.00222e-05
intermediate lobe cells	Ywhag	0.292906	0.904257	0.277	0.126	6.01835e-05
intermediate lobe cells	Rexo2	0.337311	0.967064	0.324	0.161	6.43636e-05
intermediate lobe cells	H3f3a	0.268125	1	0.831	0.592	7.03114e-05
intermediate lobe cells	Slc25a3	0.25768	1	0.703	0.437	7.7265e-05
intermediate lobe cells	Dnaja1	0.285896	1	0.493	0.282	7.92056e-05
intermediate lobe cells	Araf	0.275219	1	0.351	0.179	8.83268e-05
intermediate lobe cells	Psmb2	0.250674	1	0.385	0.205	0.00013909
intermediate lobe cells	Mcee	0.301139	1	0.304	0.153	0.000151458
intermediate lobe cells	Mlf2	0.260788	1	0.439	0.239	0.000158599
intermediate lobe cells	Pcmtd1	0.279861	1	0.338	0.171	0.000174808
intermediate lobe cells	Vcp	0.294999	1	0.466	0.284	0.000185313
intermediate lobe cells	Atp5g1	0.305036	1	0.642	0.442	0.000191906
intermediate lobe cells	Cbx5	0.284818	1	0.385	0.216	0.000227459
intermediate lobe cells	1810037I17Rik	0.25765	1	0.581	0.368	0.00030441
intermediate lobe cells	Stub1	0.250212	1	0.372	0.208	0.000372565
intermediate lobe cells	Naa38	0.275	1	0.372	0.224	0.0013908
intermediate lobe cells	Pfdn6	0.298227	1	0.257	0.137	0.00148832
intermediate lobe cells	Pdap1	0.264833	1	0.426	0.263	0.00202765
pituicyte	Col25a1	2.76224	8.38215e-82	0.878	0.024	5.5788e-86
pituicyte	Ptn	2.82624	1.47447e-75	0.954	0.229	9.81346e-80
pituicyte	Scn7a	2.57513	1.5667e-74	0.852	0.042	1.04273e-78
pituicyte	Col13a1	2.39138	9.55756e-68	0.791	0.039	6.3611e-72
pituicyte	Tbx3os1	2.15881	7.52255e-64	0.724	0.012	5.00669e-68
pituicyte	Gpc3	2.20506	8.01948e-63	0.781	0.048	5.33742e-67
pituicyte	Arl6ip1	1.84227	3.4579e-60	0.954	0.449	2.30143e-64
pituicyte	Mest	2.01152	9.92664e-60	0.929	0.377	6.60675e-64
pituicyte	Fndc3c1	1.82408	1.23195e-58	0.704	0.021	8.19931e-63
pituicyte	Gja1	1.81736	9.53999e-56	0.704	0.033	6.34941e-60
pituicyte	Cldn10	2.18352	2.61115e-55	0.673	0.024	1.73787e-59
pituicyte	Lrrtm3	1.94132	5.73276e-54	0.643	0.012	3.81548e-58
pituicyte	Vegfa	1.80499	3.15297e-52	0.638	0.018	2.09848e-56
pituicyte	Slc4a4	1.74714	4.27468e-52	0.612	0.006	2.84504e-56
pituicyte	Bcan	1.97822	2.96694e-51	0.628	0.021	1.97467e-55
pituicyte	Srebf1	1.77825	7.64446e-50	0.719	0.081	5.08783e-54
pituicyte	Lmo1	1.74537	8.98063e-50	0.679	0.054	5.97712e-54
pituicyte	Igfbp5	1.57691	3.64451e-49	0.847	0.19	2.42563e-53
pituicyte	Grik3	1.71952	1.71908e-48	0.643	0.045	1.14415e-52
pituicyte	Slc1a3	1.7924	3.12447e-47	0.73	0.111	2.07951e-51
pituicyte	Igfbp4	1.59132	2.12884e-46	0.74	0.105	1.41686e-50
pituicyte	Ntrk2	1.66487	2.36512e-46	0.709	0.105	1.57413e-50
pituicyte	Fgf10	1.62794	2.63073e-46	0.587	0.015	1.7509e-50
pituicyte	Abca8a	1.71927	3.50336e-46	0.602	0.024	2.33168e-50
pituicyte	Cysltr1	1.61282	1.55666e-42	0.612	0.048	1.03604e-46
pituicyte	Fat3	1.52223	3.97119e-41	0.526	0.012	2.64306e-45
pituicyte	Adm	1.66699	1.74472e-40	0.541	0.021	1.16121e-44
pituicyte	Col23a1	1.56182	4.01498e-40	0.541	0.021	2.6722e-44
pituicyte	Tbx3	1.44015	4.3213e-39	0.485	0.003	2.87607e-43
pituicyte	Fzd5	1.4765	2.70684e-38	0.505	0.015	1.80156e-42
pituicyte	Zfand6	1.35281	1.31317e-37	0.837	0.37	8.73992e-42
pituicyte	Rax	1.43421	1.73282e-37	0.49	0.009	1.15329e-41
pituicyte	Xpr1	1.35188	7.20169e-36	0.73	0.205	4.79314e-40
pituicyte	Fgfr1	1.36338	6.25652e-35	0.582	0.066	4.16407e-39
pituicyte	Cdh2	1.5707	8.47941e-35	0.709	0.217	5.64354e-39
pituicyte	Csrp1	1.35658	8.41106e-34	0.663	0.142	5.59805e-38
pituicyte	Islr	1.29369	1.0653e-33	0.485	0.021	7.09019e-38
pituicyte	Hmcn1	1.53158	3.8086e-33	0.505	0.036	2.53484e-37
pituicyte	Hist1h2bc	1.32765	6.44881e-33	0.75	0.253	4.29205e-37
pituicyte	Timp3	1.0792	4.75844e-32	0.684	0.136	3.16701e-36
pituicyte	Nkx2-1	1.32384	2.16403e-31	0.408	0.003	1.44029e-35
pituicyte	Car14	1.43612	2.62537e-31	0.439	0.015	1.74733e-35
pituicyte	Plppr1	1.36731	6.5175e-30	0.449	0.024	4.33777e-34
pituicyte	Gria3	1.21895	2.98342e-29	0.418	0.015	1.98564e-33
pituicyte	Rgcc	1.15009	1.1545e-28	0.607	0.127	7.68389e-33
pituicyte	Dbi	1.04346	1.27106e-28	0.801	0.331	8.45961e-33
pituicyte	Sox9	1.34669	1.66371e-28	0.5	0.06	1.10729e-32
pituicyte	Pbx1	1.09256	2.81503e-28	0.755	0.31	1.87357e-32
pituicyte	Spon1	1.11954	7.13389e-28	0.393	0.009	4.74801e-32
pituicyte	Ifi27	1.17521	8.00233e-28	0.755	0.334	5.32601e-32
pituicyte	Nfib	1.11271	9.08885e-28	0.704	0.22	6.04915e-32
pituicyte	Tmem47	1.24091	1.75007e-27	0.531	0.084	1.16477e-31
pituicyte	Htra1	1.136	2.31531e-27	0.367	0.003	1.54097e-31
pituicyte	Rgs7bp	1.28205	6.62441e-27	0.418	0.027	4.40892e-31
pituicyte	Lhx2	1.12506	1.02574e-26	0.372	0.006	6.82687e-31
pituicyte	Ano6	1.1722	1.98788e-25	0.561	0.127	1.32305e-29
pituicyte	Gldc	1.25957	2.41712e-25	0.372	0.012	1.60873e-29
pituicyte	Metrn	1.14406	3.59274e-25	0.444	0.045	2.39118e-29
pituicyte	Atp1a2	1.30118	8.30071e-25	0.52	0.099	5.5246e-29
pituicyte	mt-Co3	0.559534	1.81723e-24	1	1	1.20947e-28
pituicyte	G0s2	1.22875	3.66279e-24	0.429	0.042	2.4378e-28
pituicyte	Pdpn	0.962056	8.95105e-24	0.408	0.033	5.95744e-28
pituicyte	Slc16a2	1.12178	1.26061e-23	0.434	0.051	8.39008e-28
pituicyte	Hes1	1.38751	2.73457e-23	0.526	0.093	1.82001e-27
pituicyte	mt-Co1	0.614975	2.87408e-23	1	0.994	1.91286e-27
pituicyte	Nt5dc2	1.05906	7.68047e-23	0.352	0.015	5.11179e-27
pituicyte	mt-Atp6	0.527353	1.14027e-22	1	0.997	7.58913e-27
pituicyte	Antxr1	1.08105	1.72351e-22	0.367	0.024	1.1471e-26
pituicyte	mt-Nd4	0.558547	2.78563e-22	0.99	0.967	1.854e-26
pituicyte	mt-Nd1	0.612755	3.82614e-22	1	0.997	2.54652e-26
pituicyte	Mdk	0.926055	5.62735e-22	0.48	0.075	3.74532e-26
pituicyte	Ano1	1.14629	6.05048e-22	0.301	0	4.02694e-26
pituicyte	A2m	1.15233	1.1668e-21	0.306	0.003	7.7657e-26
pituicyte	Tspan7	1.18519	1.43577e-21	0.531	0.133	9.55589e-26
pituicyte	mt-Co2	0.553336	1.47767e-21	0.995	0.991	9.83472e-26
pituicyte	Pcdh9	1.20847	2.97469e-21	0.546	0.157	1.97983e-25
pituicyte	Lpar4	1.05468	6.42535e-21	0.332	0.015	4.27644e-25
pituicyte	Dtna	1.05133	1.60058e-20	0.357	0.03	1.06528e-24
pituicyte	Scube1	0.995935	2.30301e-20	0.301	0.006	1.53279e-24
pituicyte	Prelp	0.990701	2.67551e-20	0.459	0.075	1.78071e-24
pituicyte	Fxyd1	0.928962	7.92256e-20	0.398	0.045	5.27292e-24
pituicyte	Btbd17	0.962358	9.39094e-20	0.286	0.003	6.25021e-24
pituicyte	Npc2	0.871886	1.00616e-19	0.832	0.446	6.69659e-24
pituicyte	Cdkn1c	1.00496	1.46091e-19	0.342	0.027	9.72318e-24
pituicyte	Mecom	1.14266	2.43376e-19	0.362	0.039	1.6198e-23
pituicyte	Lgr4	1.11696	3.37752e-19	0.408	0.063	2.24793e-23
pituicyte	Scd2	1.02041	6.44032e-19	0.582	0.196	4.2864e-23
pituicyte	Atp1a1	1.0037	1.2351e-18	0.628	0.241	8.22031e-23
pituicyte	Maf	0.687454	1.24326e-18	0.74	0.283	8.27464e-23
pituicyte	Fign	1.03478	2.21673e-18	0.321	0.024	1.47536e-22
pituicyte	Fbln2	1.02514	3.37124e-18	0.276	0.006	2.24376e-22
pituicyte	Pld5	0.838126	5.49641e-18	0.281	0.009	3.65818e-22
pituicyte	Abca4	0.928383	6.85945e-18	0.265	0.003	4.56536e-22
pituicyte	Mgat5	1.12845	8.59557e-18	0.515	0.157	5.72084e-22
pituicyte	Anxa2	0.82533	1.11465e-17	0.515	0.12	7.41865e-22
pituicyte	Spats2l	0.892161	2.29729e-17	0.316	0.024	1.52898e-21
pituicyte	Gpm6b	0.960744	2.83285e-17	0.413	0.075	1.88542e-21
pituicyte	Lman1	1.04081	5.67922e-17	0.5	0.151	3.77985e-21
pituicyte	Mctp1	0.934709	5.86915e-17	0.316	0.027	3.90625e-21
pituicyte	Epha4	0.876065	6.69289e-17	0.27	0.009	4.4545e-21
pituicyte	Pmm1	0.934575	6.76327e-17	0.429	0.09	4.50135e-21
pituicyte	Fstl1	0.89722	9.88798e-17	0.362	0.048	6.58102e-21
pituicyte	Hist1h4h	0.92866	4.26054e-16	0.311	0.03	2.83563e-20
pituicyte	Ptprf	0.942849	5.52442e-16	0.5	0.16	3.67682e-20
pituicyte	Abca8b	1.00992	7.59737e-16	0.367	0.063	5.05649e-20
pituicyte	Cox6c	0.765087	8.0731e-16	0.888	0.753	5.37311e-20
pituicyte	Lgr6	0.808376	1.18473e-15	0.265	0.012	7.88506e-20
pituicyte	Gpx8	0.821173	1.54515e-15	0.286	0.021	1.02839e-19
pituicyte	Sntb2	0.900466	1.56014e-15	0.286	0.021	1.03836e-19
pituicyte	Mt3	0.85988	1.76748e-15	0.643	0.274	1.17636e-19
pituicyte	Mia	0.411685	2.30902e-15	0.505	0.123	1.53679e-19
pituicyte	mt-Cytb	0.46319	5.62046e-15	1	0.988	3.74074e-19
pituicyte	Slc41a1	0.81177	6.13555e-15	0.276	0.021	4.08356e-19
pituicyte	Plxnb2	0.96644	7.01529e-15	0.495	0.163	4.66908e-19
pituicyte	Ptprz1	0.934863	2.44044e-14	0.311	0.039	1.62425e-18
pituicyte	Deptor	0.836496	2.86576e-14	0.321	0.045	1.90733e-18
pituicyte	Enox2	0.768558	4.71431e-14	0.281	0.027	3.13764e-18
pituicyte	Fzd1	0.922322	5.68188e-14	0.276	0.024	3.78162e-18
pituicyte	Lrp5	0.867264	1.22017e-13	0.311	0.042	8.12091e-18
pituicyte	Nxn	0.914044	1.318e-13	0.316	0.048	8.77206e-18
pituicyte	Ildr2	0.842406	1.72635e-13	0.321	0.051	1.14899e-17
pituicyte	Sub1	0.657193	2.43092e-13	0.852	0.645	1.61792e-17
pituicyte	Zbtb20	0.68257	3.23658e-13	0.842	0.554	2.15413e-17
pituicyte	Mlc1	0.786408	3.69731e-13	0.26	0.021	2.46077e-17
pituicyte	Mt1	0.623771	4.80537e-13	0.888	0.633	3.19825e-17
pituicyte	Npr1	0.764199	5.07534e-13	0.26	0.021	3.37793e-17
pituicyte	6330403K07Rik	0.892545	6.01186e-13	0.607	0.292	4.00124e-17
pituicyte	Gstt1	0.801768	7.17425e-13	0.337	0.06	4.77488e-17
pituicyte	Aldoc	0.719793	7.27303e-13	0.495	0.157	4.84062e-17
pituicyte	Tgfbi	0.881356	8.95854e-13	0.291	0.036	5.96243e-17
pituicyte	mt-Nd2	0.47608	9.84497e-13	0.974	0.949	6.55239e-17
pituicyte	Fhl1	0.772984	1.62043e-12	0.296	0.042	1.07849e-16
pituicyte	Nav2	0.79144	4.64217e-12	0.378	0.087	3.08963e-16
pituicyte	Tle2	0.885786	5.48519e-12	0.327	0.063	3.65071e-16
pituicyte	Actn1	0.842398	7.25255e-12	0.367	0.09	4.82699e-16
pituicyte	Slc25a4	0.818836	8.68017e-12	0.653	0.364	5.77715e-16
pituicyte	Slc6a6	1.02638	1.34713e-11	0.622	0.349	8.96593e-16
pituicyte	Cacna2d2	0.848048	1.74866e-11	0.388	0.108	1.16383e-15
pituicyte	Mt2	0.609099	2.00721e-11	0.689	0.346	1.33591e-15
pituicyte	Cltb	0.863525	2.34378e-11	0.541	0.241	1.55992e-15
pituicyte	Rnf145	0.883995	3.56102e-11	0.347	0.081	2.37006e-15
pituicyte	Fbxo2	0.740701	1.06761e-10	0.413	0.133	7.10555e-15
pituicyte	Slc27a1	0.75178	1.14675e-10	0.332	0.075	7.63227e-15
pituicyte	Hlf	0.850463	1.73174e-10	0.378	0.105	1.15257e-14
pituicyte	Mgst1	0.664564	2.104e-10	0.352	0.078	1.40033e-14
pituicyte	Meis2	0.48293	5.9797e-10	0.27	0.039	3.97983e-14
pituicyte	Gm11266	0.714853	6.52383e-10	0.286	0.051	4.34198e-14
pituicyte	Itgav	0.703597	7.6414e-10	0.352	0.09	5.08579e-14
pituicyte	Ttyh1	0.850427	7.83013e-10	0.332	0.084	5.2114e-14
pituicyte	Cers2	0.889241	9.31832e-10	0.378	0.117	6.20188e-14
pituicyte	Sema3f	0.760797	2.06238e-09	0.327	0.084	1.37264e-13
pituicyte	Hist1h1c	0.629514	2.74659e-09	0.464	0.172	1.82802e-13
pituicyte	Tmem245	0.84171	5.66941e-09	0.495	0.223	3.77332e-13
pituicyte	Eno1	0.821648	8.33679e-09	0.362	0.114	5.54861e-13
pituicyte	Cd302	0.723317	8.58894e-09	0.301	0.069	5.71643e-13
pituicyte	Cacnb4	0.768966	9.68459e-09	0.301	0.072	6.44565e-13
pituicyte	Cntnap2	0.754994	1.48549e-08	0.332	0.09	9.88681e-13
pituicyte	Pon2	0.606377	1.54128e-08	0.327	0.081	1.02581e-12
pituicyte	Fgf1	0.784932	1.93788e-08	0.306	0.081	1.28977e-12
pituicyte	Nfix	0.654756	2.64428e-08	0.551	0.271	1.75992e-12
pituicyte	Gstm1	0.371721	4.07638e-08	0.464	0.175	2.71307e-12
pituicyte	Six3	0.682904	7.63576e-08	0.648	0.364	5.08203e-12
pituicyte	Rbms1	0.797644	8.1829e-08	0.413	0.16	5.44619e-12
pituicyte	Pls3	0.67662	8.44759e-08	0.276	0.066	5.62235e-12
pituicyte	Serpinh1	0.682347	8.85912e-08	0.286	0.069	5.89625e-12
pituicyte	Gaa	0.703361	1.09283e-07	0.5	0.235	7.27338e-12
pituicyte	Jam3	0.68031	2.05835e-07	0.265	0.057	1.36995e-11
pituicyte	Slc12a2	0.693781	3.68012e-07	0.286	0.072	2.44933e-11
pituicyte	Rbm47	0.533233	4.16177e-07	0.301	0.075	2.7699e-11
pituicyte	Abhd14b	0.713585	4.34364e-07	0.291	0.078	2.89094e-11
pituicyte	Dock7	0.795607	4.72706e-07	0.362	0.142	3.14613e-11
pituicyte	Ahsa1	0.638161	6.55289e-07	0.367	0.136	4.36133e-11
pituicyte	Atp1b2	0.697745	7.38845e-07	0.276	0.072	4.91744e-11
pituicyte	Emb	0.616177	8.46979e-07	0.327	0.102	5.63713e-11
pituicyte	Gde1	0.635393	9.08317e-07	0.347	0.12	6.04537e-11
pituicyte	Cd81	0.420811	1.1318e-06	0.776	0.554	7.53279e-11
pituicyte	Bmpr1a	0.632935	2.8465e-06	0.281	0.081	1.89451e-10
pituicyte	Ring1	0.705362	3.7385e-06	0.286	0.084	2.48819e-10
pituicyte	Amotl1	0.513916	4.71004e-06	0.337	0.111	3.1348e-10
pituicyte	Manf	0.749731	4.82421e-06	0.5	0.283	3.21079e-10
pituicyte	Lrrc8d	0.708643	4.97261e-06	0.337	0.123	3.30955e-10
pituicyte	Aldh2	0.530252	7.15816e-06	0.388	0.151	4.76416e-10
pituicyte	Sall2	0.675028	8.30108e-06	0.255	0.066	5.52485e-10
pituicyte	Lrpap1	0.65997	1.30022e-05	0.383	0.157	8.65373e-10
pituicyte	Oxt	0.944209	1.32029e-05	0.464	0.244	8.78732e-10
pituicyte	Tspan3	0.637598	2.56938e-05	0.515	0.298	1.71007e-09
pituicyte	Ppp1r9a	0.605118	4.01993e-05	0.357	0.142	2.67549e-09
pituicyte	Pmp22	0.449871	4.0487e-05	0.26	0.069	2.69464e-09
pituicyte	Pigp	0.669329	4.10045e-05	0.429	0.211	2.72908e-09
pituicyte	Cds2	0.660593	5.13925e-05	0.367	0.16	3.42047e-09
pituicyte	Rmst	0.734111	5.2128e-05	0.291	0.102	3.46942e-09
pituicyte	Itgb5	0.468663	5.24539e-05	0.316	0.102	3.49111e-09
pituicyte	App	0.455411	6.48825e-05	0.546	0.28	4.3183e-09
pituicyte	P3h3	0.64461	8.58913e-05	0.265	0.087	5.71656e-09
pituicyte	Sox2	0.553843	8.96006e-05	0.311	0.111	5.96343e-09
pituicyte	Vimp	0.64469	9.03109e-05	0.52	0.307	6.01071e-09
pituicyte	Amfr	0.670054	9.52297e-05	0.306	0.117	6.33809e-09
pituicyte	Map1b	0.703992	0.000121198	0.505	0.298	8.06641e-09
pituicyte	Timm8b	0.509916	0.000185494	0.429	0.205	1.23457e-08
pituicyte	Lmo4	0.559095	0.000277394	0.536	0.325	1.84621e-08
pituicyte	Timp2	0.564373	0.000294234	0.449	0.235	1.9583e-08
pituicyte	Jkamp	0.518679	0.000511335	0.26	0.087	3.40323e-08
pituicyte	Cdk14	0.656453	0.00065029	0.296	0.12	4.32805e-08
pituicyte	mt-Nd3	0.473182	0.000674987	0.847	0.696	4.49243e-08
pituicyte	Ptprs	0.584298	0.000744571	0.327	0.139	4.95555e-08
pituicyte	Nisch	0.557221	0.000807909	0.602	0.422	5.3771e-08
pituicyte	Tmem59	0.562796	0.000812341	0.597	0.404	5.4066e-08
pituicyte	Tmem165	0.566914	0.000920248	0.281	0.108	6.12478e-08
pituicyte	mt-Nd5	0.533466	0.00100565	0.77	0.575	6.69316e-08
pituicyte	Tmem259	0.522601	0.00146017	0.255	0.09	9.71825e-08
pituicyte	Lrp1	0.411411	0.00166379	0.327	0.139	1.10735e-07
pituicyte	Ap1s2	0.636667	0.00217965	0.434	0.25	1.45068e-07
pituicyte	Gm20594	0.691389	0.00252887	0.372	0.196	1.68311e-07
pituicyte	Slc25a36	0.56526	0.00348373	0.332	0.148	2.31862e-07
pituicyte	Ssr3	0.599985	0.00349725	0.439	0.262	2.32762e-07
pituicyte	Rab34	0.43868	0.00408187	0.265	0.096	2.71672e-07
pituicyte	Tnfaip1	0.543342	0.00428506	0.265	0.102	2.85196e-07
pituicyte	Ccdc125	0.49489	0.00472745	0.26	0.093	3.14639e-07
pituicyte	1810022K09Rik	0.549664	0.00503326	0.464	0.268	3.34993e-07
pituicyte	Cd63	0.534156	0.0081355	0.566	0.422	5.41465e-07
pituicyte	Bsg	0.421554	0.00876562	0.638	0.455	5.83402e-07
pituicyte	Gpx4	0.471481	0.00886622	0.679	0.569	5.90098e-07
pituicyte	Dhrs1	0.472331	0.00976066	0.291	0.123	6.49628e-07
pituicyte	Elovl5	0.569584	0.011632	0.286	0.123	7.74174e-07
pituicyte	Celf2	0.464268	0.0121411	0.571	0.392	8.0806e-07
pituicyte	Mif	0.514397	0.017442	0.515	0.34	1.16086e-06
pituicyte	Syt11	0.594013	0.0219766	0.403	0.232	1.46267e-06
pituicyte	Mettl7a1	0.46809	0.0231825	0.26	0.105	1.54293e-06
pituicyte	Ldhb	0.450599	0.0234846	0.306	0.136	1.56304e-06
pituicyte	Unc50	0.488337	0.024923	0.291	0.13	1.65877e-06
pituicyte	Iqgap1	0.520675	0.0264112	0.342	0.175	1.75782e-06
pituicyte	Son	0.353575	0.0270583	0.837	0.762	1.80089e-06
pituicyte	Aplp2	0.373259	0.0303738	0.408	0.214	2.02155e-06
pituicyte	Srp14	0.482322	0.0340967	0.592	0.419	2.26933e-06
pituicyte	Rcn2	0.46986	0.0344022	0.474	0.301	2.28966e-06
pituicyte	Lamp2	0.413611	0.0346396	0.495	0.304	2.30547e-06
pituicyte	Crip2	0.448797	0.0347557	0.296	0.13	2.31319e-06
pituicyte	Rbm39	0.326186	0.0396175	0.847	0.744	2.63677e-06
pituicyte	Hiatl1	0.417262	0.0431389	0.255	0.102	2.87114e-06
pituicyte	Zcchc11	0.527971	0.043328	0.393	0.232	2.88373e-06
pituicyte	Prdx6	0.461035	0.0519682	0.383	0.214	3.45878e-06
pituicyte	Tcn2	0.383061	0.0522738	0.26	0.105	3.47912e-06
pituicyte	Eif4g3	0.509437	0.0534989	0.352	0.187	3.56066e-06
pituicyte	Sorbs2	0.57187	0.0660971	0.265	0.12	4.39914e-06
pituicyte	Kcnq1ot1	0.521026	0.0752187	0.648	0.464	5.00624e-06
pituicyte	Abca2	0.584507	0.0769811	0.255	0.111	5.12353e-06
pituicyte	Adgrl3	0.526209	0.0798396	0.265	0.117	5.31378e-06
pituicyte	Ndufa7	0.434142	0.0836633	0.673	0.548	5.56827e-06
pituicyte	Cystm1	0.513632	0.0924587	0.372	0.208	6.15366e-06
pituicyte	Igf1r	0.531075	0.107449	0.357	0.199	7.15137e-06
pituicyte	Cadm1	0.38242	0.114078	0.582	0.395	7.59255e-06
pituicyte	Ahcyl2	0.46614	0.116222	0.255	0.111	7.73527e-06
pituicyte	mt-Nd4l	0.487105	0.138163	0.449	0.292	9.19553e-06
pituicyte	Ndufa4	0.414576	0.213765	0.607	0.482	1.42273e-05
pituicyte	Dnajc3	0.449509	0.218786	0.362	0.211	1.45615e-05
pituicyte	Nedd4	0.458602	0.269599	0.469	0.31	1.79434e-05
pituicyte	Skp1a	0.360177	0.283294	0.602	0.431	1.88548e-05
pituicyte	Hspb1	0.58879	0.288871	0.367	0.211	1.9226e-05
pituicyte	Sdc4	0.328668	0.333749	0.362	0.196	2.22129e-05
pituicyte	Uqcr11	0.419428	0.348061	0.689	0.572	2.31655e-05
pituicyte	Tmco1	0.35964	0.350638	0.469	0.301	2.3337e-05
pituicyte	Ddt	0.528438	0.36782	0.281	0.145	2.44805e-05
pituicyte	Smim4	0.527216	0.401196	0.276	0.145	2.67019e-05
pituicyte	Map2	0.459533	0.425981	0.383	0.235	2.83515e-05
pituicyte	Clstn1	0.511976	0.507158	0.362	0.217	3.37542e-05
pituicyte	Fndc3b	0.43341	0.50732	0.255	0.123	3.37651e-05
pituicyte	Serinc1	0.430766	0.514048	0.444	0.301	3.42128e-05
pituicyte	Tmed9	0.454357	0.674012	0.408	0.253	4.48593e-05
pituicyte	Ppib	0.459049	0.693501	0.408	0.262	4.61565e-05
pituicyte	Ogt	0.456781	0.695633	0.612	0.464	4.62984e-05
pituicyte	Sec62	0.375106	0.7682	0.622	0.482	5.11281e-05
pituicyte	Uqcr10	0.311196	0.857388	0.689	0.569	5.70641e-05
pituicyte	Pcca	0.503413	0.858926	0.27	0.136	5.71665e-05
pituicyte	Impad1	0.475677	0.877659	0.301	0.166	5.84132e-05
pituicyte	Rer1	0.397675	0.893064	0.306	0.163	5.94386e-05
pituicyte	Ctnna1	0.372185	0.923894	0.286	0.145	6.14905e-05
pituicyte	Atp6v1a	0.388227	1	0.301	0.16	6.82749e-05
pituicyte	Arglu1	0.456421	1	0.495	0.346	7.27502e-05
pituicyte	Gt(ROSA)26Sor	0.4089	1	0.296	0.154	7.93474e-05
pituicyte	Top1	0.46336	1	0.49	0.367	8.46213e-05
pituicyte	Tead1	0.396706	1	0.276	0.145	8.61649e-05
pituicyte	Dst	0.437768	1	0.357	0.217	8.68691e-05
pituicyte	9530068E07Rik	0.474302	1	0.27	0.151	8.88857e-05
pituicyte	Bloc1s1	0.307	1	0.378	0.217	9.42983e-05
pituicyte	Abca1	0.353047	1	0.316	0.169	9.63135e-05
pituicyte	Chka	0.441698	1	0.311	0.178	0.000106127
pituicyte	Atraid	0.47298	1	0.378	0.244	0.000111517
pituicyte	Tpp1	0.350414	1	0.311	0.169	0.000115498
pituicyte	Tshz2	0.519386	1	0.449	0.322	0.000139632
pituicyte	Tmem147	0.471374	1	0.306	0.175	0.000147976
pituicyte	Polr2k	0.442571	1	0.434	0.307	0.000148077
pituicyte	Cwc15	0.432653	1	0.352	0.22	0.000155554
pituicyte	Calm2	0.26666	1	0.867	0.72	0.000172646
pituicyte	Gpcpd1	0.464407	1	0.255	0.136	0.00021351
pituicyte	Mageh1	0.463093	1	0.26	0.145	0.000217422
pituicyte	Yipf4	0.485463	1	0.357	0.232	0.000225884
pituicyte	Strbp	0.365878	1	0.26	0.139	0.000248699
pituicyte	Prpf40a	0.376443	1	0.276	0.151	0.00025212
pituicyte	Txndc15	0.361638	1	0.255	0.133	0.000279731
pituicyte	Cd9	0.272513	1	0.464	0.316	0.000289357
pituicyte	Ndufc2	0.386795	1	0.495	0.373	0.000318838
pituicyte	Maged1	0.296953	1	0.541	0.386	0.00032226
pituicyte	Rpn2	0.403667	1	0.352	0.223	0.000333957
pituicyte	Ssbp3	0.458217	1	0.342	0.229	0.000354831
pituicyte	Ccnt2	0.436709	1	0.367	0.244	0.000385384
pituicyte	Dynlrb1	0.3757	1	0.449	0.325	0.000399845
pituicyte	Higd2a	0.289247	1	0.418	0.277	0.000442708
pituicyte	Mrps14	0.369409	1	0.388	0.259	0.000534753
pituicyte	Ubap2l	0.305354	1	0.464	0.331	0.000573712
pituicyte	Higd1a	0.444595	1	0.408	0.283	0.000586046
pituicyte	Hspa9	0.306402	1	0.291	0.172	0.000587179
pituicyte	Msi2	0.338615	1	0.454	0.337	0.00061752
pituicyte	Ttc14	0.325271	1	0.449	0.316	0.000626647
pituicyte	Ift20	0.387681	1	0.449	0.322	0.000669996
pituicyte	Slc39a1	0.394089	1	0.316	0.196	0.000671485
pituicyte	Etnk1	0.358972	1	0.357	0.238	0.000726619
pituicyte	Atp6v1e1	0.338275	1	0.388	0.265	0.00078209
pituicyte	Usmg5	0.296626	1	0.735	0.675	0.000790597
pituicyte	Ndufs5	0.344788	1	0.531	0.44	0.000878806
pituicyte	Rsrp1	0.26905	1	0.75	0.696	0.000901562
pituicyte	Anapc13	0.35683	1	0.5	0.41	0.000914298
pituicyte	Hibadh	0.403351	1	0.276	0.175	0.00112442
pituicyte	mt-Atp8	0.339705	1	0.566	0.476	0.00112743
pituicyte	Sh3glb1	0.328918	1	0.388	0.265	0.00129121
pituicyte	Eif4g1	0.318452	1	0.316	0.196	0.00130406
pituicyte	Akap8l	0.380222	1	0.26	0.154	0.00134817
pituicyte	Ube3a	0.288578	1	0.444	0.331	0.00165773
pituicyte	Ostc	0.373503	1	0.301	0.202	0.00168038
pituicyte	Tmbim6	0.327357	1	0.551	0.443	0.00175282
pituicyte	Saraf	0.297376	1	0.469	0.358	0.00194058
pituicyte	Slirp	0.348041	1	0.464	0.352	0.00198971
pituicyte	Snrnp70	0.263113	1	0.362	0.241	0.00203752
pituicyte	Itpr1	0.286725	1	0.27	0.163	0.00212345
pituicyte	Prrc2b	0.337404	1	0.27	0.172	0.0022552
pituicyte	Gclm	0.299555	1	0.26	0.154	0.00225919
pituicyte	Zc3h15	0.362555	1	0.352	0.247	0.00227783
pituicyte	Hsbp1	0.350077	1	0.464	0.361	0.00253493
pituicyte	Rps27l	0.282901	1	0.577	0.488	0.002612
pituicyte	1110008P14Rik	0.281267	1	0.316	0.208	0.00267337
pituicyte	Grina	0.333575	1	0.281	0.181	0.0028297
pituicyte	Socs2	0.25071	1	0.286	0.184	0.0031218
pituicyte	Hint1	0.309439	1	0.617	0.542	0.00320484
pituicyte	Prpf4b	0.35409	1	0.337	0.232	0.00355531
pituicyte	Baz2b	0.286695	1	0.332	0.223	0.00379033
pituicyte	Srsf2	0.33698	1	0.464	0.37	0.004127
pituicyte	Ndufb3	0.370878	1	0.439	0.358	0.00419178
pituicyte	Polr2f	0.316978	1	0.398	0.298	0.00440571
pituicyte	Uqcrb	0.280161	1	0.628	0.551	0.00444987
pituicyte	Sept15	0.343423	1	0.495	0.431	0.00472109
pituicyte	Gm8797	0.284944	1	0.316	0.217	0.00489555
pituicyte	Trappc6b	0.341517	1	0.265	0.175	0.00504706
pituicyte	Malat1	0.394725	1	0.934	0.982	0.00511237
pituicyte	Atp6v0b	0.277425	1	0.5	0.398	0.00550462
pituicyte	Cox7c	0.284147	1	0.811	0.759	0.00629424
pituicyte	Srek1	0.338285	1	0.281	0.193	0.00665257
pituicyte	Zfr	0.346854	1	0.306	0.223	0.00705741
pituicyte	Tceal8	0.297775	1	0.347	0.253	0.00785701
pituicyte	Ttc3	0.288027	1	0.388	0.295	0.0079069
pituicyte	Csnk2a1	0.344861	1	0.27	0.181	0.00806294
pituicyte	Map1lc3b	0.308722	1	0.321	0.226	0.00860148
pituicyte	Rere	0.317865	1	0.26	0.175	0.00865616
pituicyte	Spcs1	0.321435	1	0.393	0.31	0.00889783
pituicyte	Npdc1	0.429995	1	0.286	0.205	0.00922227
pituicyte	Tm2d1	0.282575	1	0.296	0.208	0.00994038
macrophage/microglia	Ctss	3.43782	1.12998e-87	0.958	0.048	7.52068e-92
macrophage/microglia	C1qa	3.78905	6.14291e-87	0.937	0.042	4.08846e-91
macrophage/microglia	Ly86	2.72988	9.9834e-86	0.874	0.018	6.64453e-90
macrophage/microglia	Fcer1g	2.69713	6.15547e-85	0.979	0.062	4.09682e-89
macrophage/microglia	Cx3cr1	3.08906	2.27178e-84	0.884	0.028	1.512e-88
macrophage/microglia	Tyrobp	2.95096	2.67197e-84	0.947	0.048	1.77835e-88
macrophage/microglia	C1qb	3.46796	3.18025e-84	0.947	0.055	2.11664e-88
macrophage/microglia	C1qc	3.46947	5.10309e-81	0.926	0.058	3.3964e-85
macrophage/microglia	Csf1r	2.61174	4.68023e-77	0.779	0.012	3.11496e-81
macrophage/microglia	Rgs10	2.24337	2.25528e-74	0.874	0.048	1.50102e-78
macrophage/microglia	Adap2os	2.15454	4.65313e-71	0.737	0.012	3.09693e-75
macrophage/microglia	Lair1	2.05495	3.46066e-68	0.663	0	2.30327e-72
macrophage/microglia	Trem2	2.29435	5.7215e-66	0.716	0.018	3.80798e-70
macrophage/microglia	Hexb	2.60294	4.94843e-61	0.884	0.113	3.29347e-65
macrophage/microglia	Mef2c	2.00249	2.48718e-60	0.821	0.067	1.65536e-64
macrophage/microglia	Mpeg1	1.96667	2.25201e-59	0.621	0.007	1.49884e-63
macrophage/microglia	Pld4	1.89602	2.50977e-59	0.632	0.009	1.67039e-63
macrophage/microglia	Aif1	2.23537	3.47385e-57	0.674	0.028	2.31204e-61
macrophage/microglia	Fcgr3	2.0094	2.87363e-56	0.621	0.014	1.91256e-60
macrophage/microglia	Hk2	1.99213	4.56466e-55	0.6	0.012	3.03804e-59
macrophage/microglia	Lst1	1.92214	1.27598e-53	0.653	0.03	8.49238e-58
macrophage/microglia	Ctsc	1.84496	4.56792e-52	0.6	0.018	3.04022e-56
macrophage/microglia	Gpr34	1.8912	9.89337e-52	0.558	0.007	6.58461e-56
macrophage/microglia	Adap2	1.6695	4.99969e-51	0.516	0	3.32758e-55
macrophage/microglia	Laptm5	1.90927	7.46187e-51	0.768	0.074	4.9663e-55
macrophage/microglia	Lyz2	2.52697	1.1053e-50	0.632	0.03	7.35642e-55
macrophage/microglia	Lgmn	2.37706	1.49656e-49	0.789	0.115	9.96045e-54
macrophage/microglia	Zeb2	1.88091	1.93844e-49	0.621	0.03	1.29014e-53
macrophage/microglia	Il1b	2.52065	3.04779e-46	0.505	0.007	2.02848e-50
macrophage/microglia	Cybb	1.73514	3.62627e-46	0.505	0.007	2.41349e-50
macrophage/microglia	Fyb	1.78759	2.86288e-45	0.674	0.055	1.90541e-49
macrophage/microglia	Siglech	1.84931	4.19823e-45	0.484	0.005	2.79416e-49
macrophage/microglia	AF251705	1.64582	5.23462e-45	0.484	0.005	3.48394e-49
macrophage/microglia	Fcrls	1.82985	5.35133e-45	0.484	0.005	3.56162e-49
macrophage/microglia	Kctd12	1.92015	1.34832e-44	0.611	0.042	8.97387e-49
macrophage/microglia	Cd68	1.49676	4.09695e-44	0.537	0.018	2.72676e-48
macrophage/microglia	Tmem119	1.67542	6.74482e-44	0.463	0.002	4.48907e-48
macrophage/microglia	Ftl1	1.9465	7.40956e-44	1	0.744	4.93149e-48
macrophage/microglia	Ctsd	2.92755	1.54275e-43	0.874	0.268	1.02679e-47
macrophage/microglia	Ctsz	2.03439	4.12094e-43	0.768	0.132	2.74272e-47
macrophage/microglia	Cst3	2.4698	6.17911e-43	0.989	0.767	4.11255e-47
macrophage/microglia	Slc15a3	1.73219	1.58461e-42	0.463	0.005	1.05465e-46
macrophage/microglia	Ctsh	1.94379	6.8697e-42	0.737	0.115	4.57218e-46
macrophage/microglia	Sepp1	2.43803	8.74999e-42	0.895	0.3	5.82362e-46
macrophage/microglia	Ccl3	2.92558	8.26586e-41	0.526	0.025	5.5014e-45
macrophage/microglia	Spi1	1.60138	1.82691e-40	0.484	0.014	1.21591e-44
macrophage/microglia	Bin2	1.68858	3.06615e-40	0.526	0.025	2.0407e-44
macrophage/microglia	Ccl4	3.44308	7.74274e-39	0.632	0.074	5.15324e-43
macrophage/microglia	Cd53	1.54766	6.72506e-38	0.6	0.051	4.47592e-42
macrophage/microglia	Cd52	1.14325	6.74591e-38	0.842	0.132	4.48979e-42
macrophage/microglia	Fcgr2b	1.5183	7.46758e-38	0.432	0.007	4.97011e-42
macrophage/microglia	Pou2f2	1.82499	9.24299e-38	0.674	0.097	6.15174e-42
macrophage/microglia	Mafb	1.66097	2.0186e-37	0.516	0.032	1.3435e-41
macrophage/microglia	P2ry12	1.37327	6.45557e-37	0.4	0.002	4.29655e-41
macrophage/microglia	B2m	1.5166	1.01707e-36	0.989	0.591	6.76921e-41
macrophage/microglia	Tmsb4x	1.57573	3.58172e-36	1	0.797	2.38384e-40
macrophage/microglia	Sat1	1.81354	4.28663e-36	0.821	0.208	2.853e-40
macrophage/microglia	Ccl12	3.12118	6.05824e-36	0.442	0.014	4.03211e-40
macrophage/microglia	Cd33	1.37081	8.29779e-36	0.421	0.009	5.52266e-40
macrophage/microglia	Serinc3	1.6234	2.85803e-35	0.905	0.319	1.90218e-39
macrophage/microglia	Plek	1.46686	1.03771e-34	0.432	0.014	6.90657e-39
macrophage/microglia	Irf8	1.66208	5.77256e-34	0.526	0.044	3.84197e-38
macrophage/microglia	Evi2a	1.31006	1.87013e-33	0.432	0.016	1.24468e-37
macrophage/microglia	Marcks	1.65848	2.41004e-33	0.832	0.277	1.60402e-37
macrophage/microglia	Ltc4s	1.48199	1.79701e-32	0.347	0	1.19601e-36
macrophage/microglia	Hpgds	1.61283	2.05003e-32	0.558	0.065	1.36442e-36
macrophage/microglia	Unc93b1	1.57136	2.3652e-32	0.516	0.048	1.57418e-36
macrophage/microglia	Cd180	1.34629	4.04104e-32	0.358	0.002	2.68954e-36
macrophage/microglia	Gatm	1.43051	1.01391e-31	0.453	0.025	6.74818e-36
macrophage/microglia	Ctsb	1.80227	1.08651e-31	0.916	0.543	7.23134e-36
macrophage/microglia	Tgfbr1	1.67155	1.84589e-31	0.611	0.097	1.22855e-35
macrophage/microglia	Lyn	1.23698	2.07809e-31	0.4	0.014	1.38309e-35
macrophage/microglia	P2ry6	1.4911	3.24131e-31	0.347	0.002	2.15728e-35
macrophage/microglia	Ppfia4	1.27411	4.04039e-31	0.379	0.009	2.68911e-35
macrophage/microglia	Grn	1.65294	2.30324e-30	0.758	0.212	1.53294e-34
macrophage/microglia	Cd83	1.7697	3.9022e-29	0.379	0.014	2.59714e-33
macrophage/microglia	Itgam	1.26134	6.16923e-29	0.326	0.002	4.10598e-33
macrophage/microglia	Hck	1.11144	9.93078e-29	0.326	0.002	6.60951e-33
macrophage/microglia	Olfml3	1.48536	8.83018e-28	0.421	0.028	5.87699e-32
macrophage/microglia	Fcgr1	1.1988	1.43668e-27	0.326	0.005	9.56193e-32
macrophage/microglia	Vsir	1.33853	8.14669e-27	0.474	0.051	5.42209e-31
macrophage/microglia	Trf	1.38593	1.36026e-26	0.558	0.085	9.05329e-31
macrophage/microglia	Slc11a1	1.04781	1.44194e-26	0.316	0.005	9.59695e-31
macrophage/microglia	Bcl2a1b	1.21769	2.57824e-26	0.432	0.032	1.71597e-30
macrophage/microglia	H2-D1	1.41292	5.04077e-26	0.884	0.439	3.35492e-30
macrophage/microglia	Crybb1	1.59326	6.24483e-26	0.358	0.016	4.15629e-30
macrophage/microglia	Il21r	1.17258	3.33187e-25	0.347	0.014	2.21755e-29
macrophage/microglia	Ccl2	1.77136	3.69527e-25	0.316	0.007	2.45942e-29
macrophage/microglia	Rps29	0.731964	4.14856e-25	1	0.991	2.7611e-29
macrophage/microglia	Arpc1b	1.36191	1.07107e-24	0.684	0.187	7.12857e-29
macrophage/microglia	Inpp5d	1.20729	1.1668e-24	0.358	0.018	7.76569e-29
macrophage/microglia	Selplg	1.48705	1.23168e-24	0.516	0.069	8.19751e-29
macrophage/microglia	Cd84	1.25355	1.47683e-24	0.4	0.03	9.82913e-29
macrophage/microglia	Cd14	1.62101	2.42453e-24	0.316	0.009	1.61366e-28
macrophage/microglia	Ptgs1	1.24501	2.46151e-24	0.347	0.016	1.63828e-28
macrophage/microglia	Fth1	1.16481	4.12697e-24	1	0.942	2.74674e-28
macrophage/microglia	Hpgd	1.06768	2.98654e-23	0.295	0.007	1.98771e-27
macrophage/microglia	Ncf1	1.14363	3.77976e-23	0.305	0.009	2.51565e-27
macrophage/microglia	Lpcat2	1.1495	4.91562e-23	0.316	0.012	3.27163e-27
macrophage/microglia	Basp1	1.36648	1.94109e-22	0.432	0.053	1.29191e-26
macrophage/microglia	Ptprc	0.9129	2.09364e-22	0.547	0.081	1.39344e-26
macrophage/microglia	Cd86	0.912277	3.64557e-22	0.284	0.007	2.42633e-26
macrophage/microglia	Adgre1	1.12407	5.63442e-22	0.284	0.007	3.75003e-26
macrophage/microglia	Ptpn18	1.00657	1.07863e-21	0.684	0.162	7.17889e-26
macrophage/microglia	Lat2	0.944165	3.26676e-21	0.253	0.002	2.17422e-25
macrophage/microglia	Clec4a2	0.954469	4.01646e-21	0.263	0.005	2.67318e-25
macrophage/microglia	C3ar1	1.10052	5.46743e-21	0.274	0.007	3.63889e-25
macrophage/microglia	Slco2b1	1.03614	8.44436e-21	0.284	0.009	5.62021e-25
macrophage/microglia	Man2b1	1.25367	1.59895e-20	0.379	0.037	1.06419e-24
macrophage/microglia	Cyth4	1.05999	3.00915e-20	0.316	0.018	2.00276e-24
macrophage/microglia	Psap	0.959206	3.98773e-20	0.926	0.693	2.65406e-24
macrophage/microglia	Susd3	0.951209	7.32971e-20	0.253	0.005	4.87835e-24
macrophage/microglia	Itm2b	0.949373	1.33668e-19	0.968	0.855	8.89637e-24
macrophage/microglia	Cd74	2.85492	1.466e-19	0.505	0.102	9.75707e-24
macrophage/microglia	Lcp1	1.17523	5.04727e-19	0.474	0.076	3.35925e-23
macrophage/microglia	Ms4a6c	1.07391	1.01239e-18	0.284	0.014	6.73806e-23
macrophage/microglia	Tmcc3	1.39565	1.78854e-18	0.568	0.162	1.19038e-22
macrophage/microglia	Ptpn6	0.952201	2.21307e-18	0.337	0.03	1.47293e-22
macrophage/microglia	Coro1a	0.870276	2.62372e-18	0.495	0.079	1.74623e-22
macrophage/microglia	Cxcl16	1.3145	4.46775e-18	0.389	0.051	2.97354e-22
macrophage/microglia	Cttnbp2nl	0.919763	1.60666e-17	0.326	0.03	1.06933e-21
macrophage/microglia	Bmp2k	1.08222	2.07886e-17	0.284	0.018	1.3836e-21
macrophage/microglia	Gmfg	0.954952	4.21934e-17	0.368	0.044	2.80821e-21
macrophage/microglia	Actb	1.03012	5.88775e-17	0.989	0.848	3.91864e-21
macrophage/microglia	Plxdc2	1.0817	7.68395e-17	0.337	0.037	5.11411e-21
macrophage/microglia	Tm6sf1	1.0366	1.59249e-16	0.316	0.03	1.05989e-20
macrophage/microglia	Cyba	1.19265	2.34795e-16	0.642	0.224	1.56269e-20
macrophage/microglia	Anxa3	1.06519	2.67233e-16	0.368	0.048	1.77859e-20
macrophage/microglia	Mbnl1	0.877378	1.5076e-15	0.674	0.231	1.0034e-19
macrophage/microglia	Rhoh	1.05775	1.73573e-15	0.284	0.023	1.15523e-19
macrophage/microglia	Epb41l2	1.03432	2.40971e-15	0.379	0.06	1.6038e-19
macrophage/microglia	Itgb2	0.840784	2.90931e-15	0.295	0.025	1.93631e-19
macrophage/microglia	Zfp36	1.47527	3.01196e-15	0.6	0.215	2.00463e-19
macrophage/microglia	Gngt2	0.864897	4.82269e-15	0.274	0.021	3.20978e-19
macrophage/microglia	St3gal6	1.04131	5.24292e-15	0.337	0.044	3.48946e-19
macrophage/microglia	Ncf2	0.973842	6.01432e-15	0.284	0.025	4.00288e-19
macrophage/microglia	Nfkbia	1.57839	9.24122e-15	0.495	0.132	6.15056e-19
macrophage/microglia	Capza2	1.16956	1.12285e-14	0.674	0.303	7.47324e-19
macrophage/microglia	Hmha1	0.893554	1.33711e-14	0.316	0.035	8.89924e-19
macrophage/microglia	Sh3bgrl3	0.881058	1.62016e-14	0.779	0.383	1.07831e-18
macrophage/microglia	Ptpre	0.975974	1.98905e-14	0.274	0.023	1.32383e-18
macrophage/microglia	Axl	0.956571	3.13055e-14	0.389	0.069	2.08356e-18
macrophage/microglia	Fgd2	1.00915	3.33719e-14	0.347	0.053	2.22109e-18
macrophage/microglia	Rpl18a	0.61163	3.91059e-14	0.958	0.85	2.60272e-18
macrophage/microglia	Rps11	0.599343	6.51554e-14	0.979	0.878	4.33647e-18
macrophage/microglia	Ctsa	1.19394	7.56292e-14	0.463	0.118	5.03356e-18
macrophage/microglia	Ccr5	0.910564	7.59972e-14	0.274	0.025	5.05805e-18
macrophage/microglia	Gpr65	0.994535	1.91025e-13	0.263	0.023	1.27138e-17
macrophage/microglia	Tgfb1	1.03788	2.29046e-13	0.358	0.06	1.52444e-17
macrophage/microglia	Ly6e	0.948256	4.06113e-13	0.863	0.577	2.70291e-17
macrophage/microglia	Efhd2	1.04205	5.10496e-13	0.484	0.129	3.39764e-17
macrophage/microglia	H2-K1	0.833428	8.5556e-13	0.842	0.46	5.69424e-17
macrophage/microglia	Apoe	2.12303	3.11603e-12	0.821	0.594	2.07389e-16
macrophage/microglia	Hexa	1.20467	3.58897e-12	0.505	0.169	2.38867e-16
macrophage/microglia	Srgap2	1.13817	3.97866e-12	0.295	0.042	2.64803e-16
macrophage/microglia	Snx5	1.11443	6.42969e-12	0.505	0.162	4.27932e-16
macrophage/microglia	Creg1	1.10533	1.51878e-11	0.442	0.122	1.01084e-15
macrophage/microglia	Abhd12	1.11683	1.89421e-11	0.432	0.12	1.26071e-15
macrophage/microglia	Lmo2	0.797095	2.30968e-11	0.263	0.03	1.53722e-15
macrophage/microglia	Prkcd	0.963911	3.016e-11	0.263	0.032	2.00732e-15
macrophage/microglia	Gm9843	0.782774	1.13041e-10	0.853	0.672	7.5235e-15
macrophage/microglia	Gm26532	0.994416	1.63159e-10	0.305	0.053	1.08592e-14
macrophage/microglia	Pycard	0.999648	2.24333e-10	0.358	0.076	1.49306e-14
macrophage/microglia	Ier3	1.25073	4.91706e-10	0.358	0.081	3.27258e-14
macrophage/microglia	Arhgdib	0.756467	6.02779e-10	0.379	0.081	4.01184e-14
macrophage/microglia	Rpl32	0.418842	6.52369e-10	0.968	0.901	4.34189e-14
macrophage/microglia	Arrb2	0.894841	7.97387e-10	0.274	0.042	5.30707e-14
macrophage/microglia	Rpl35a	0.493593	9.56511e-10	0.979	0.915	6.36613e-14
macrophage/microglia	H2-Eb1	2.08569	1.11931e-09	0.263	0.039	7.44965e-14
macrophage/microglia	Gm10116	1.1341	1.76671e-09	0.589	0.273	1.17585e-13
macrophage/microglia	Tnfaip8	0.748086	1.95003e-09	0.274	0.042	1.29785e-13
macrophage/microglia	Rps24	0.435051	2.13353e-09	0.989	0.857	1.41999e-13
macrophage/microglia	Sdcbp	0.920835	2.98402e-09	0.589	0.273	1.98604e-13
macrophage/microglia	Pmepa1	1.06217	3.076e-09	0.4	0.115	2.04726e-13
macrophage/microglia	Mob3c	0.813202	3.685e-09	0.274	0.046	2.45258e-13
macrophage/microglia	Tgfbr2	0.916007	4.01018e-09	0.284	0.048	2.66901e-13
macrophage/microglia	Atox1	0.958717	4.59455e-09	0.695	0.418	3.05794e-13
macrophage/microglia	Ifi27l2a	1.09192	5.20589e-09	0.568	0.238	3.46482e-13
macrophage/microglia	Fau	0.833492	6.5275e-09	0.747	0.501	4.34442e-13
macrophage/microglia	Rps25	0.487544	7.16075e-09	0.979	0.871	4.76589e-13
macrophage/microglia	Srgn	0.642579	9.68965e-09	0.347	0.072	6.44902e-13
macrophage/microglia	Nrp1	0.712022	1.33591e-08	0.316	0.062	8.89122e-13
macrophage/microglia	Trim30a	0.949283	1.87392e-08	0.326	0.072	1.2472e-12
macrophage/microglia	Rplp1	0.456996	1.95407e-08	0.979	0.94	1.30054e-12
macrophage/microglia	Rplp0	0.523655	1.96085e-08	0.916	0.778	1.30506e-12
macrophage/microglia	Rpl10a	0.624618	2.35044e-08	0.884	0.679	1.56435e-12
macrophage/microglia	Gm13139	0.775869	2.4398e-08	0.305	0.062	1.62383e-12
macrophage/microglia	Arpc4	0.954901	2.93026e-08	0.432	0.141	1.95026e-12
macrophage/microglia	Bst2	0.946559	2.95094e-08	0.505	0.189	1.96402e-12
macrophage/microglia	Rnaset2b	0.726304	3.629e-08	0.695	0.365	2.41531e-12
macrophage/microglia	Rps4x	0.553674	5.13959e-08	0.947	0.824	3.42069e-12
macrophage/microglia	Tpm3	0.858583	7.32718e-08	0.495	0.201	4.87666e-12
macrophage/microglia	Nfe2l2	1.0181	9.34164e-08	0.389	0.125	6.2174e-12
macrophage/microglia	Qk	0.853389	1.89888e-07	0.526	0.226	1.26381e-11
macrophage/microglia	Rrbp1	0.853216	2.05907e-07	0.705	0.45	1.37043e-11
macrophage/microglia	H2-Ab1	2.18893	2.1279e-07	0.274	0.058	1.41624e-11
macrophage/microglia	Ucp2	0.806217	2.31839e-07	0.589	0.298	1.54302e-11
macrophage/microglia	Psmb8	0.781251	2.84032e-07	0.453	0.152	1.89039e-11
macrophage/microglia	PISD	1.05388	2.89157e-07	0.516	0.226	1.9245e-11
macrophage/microglia	Rpl39	0.376443	3.707e-07	0.979	0.977	2.46722e-11
macrophage/microglia	Wdr89	0.400123	4.54666e-07	0.947	0.857	3.02606e-11
macrophage/microglia	Sp110	0.790063	4.69122e-07	0.295	0.062	3.12227e-11
macrophage/microglia	Ifnar2	0.777459	5.63464e-07	0.305	0.072	3.75017e-11
macrophage/microglia	Ifngr1	0.912546	6.45084e-07	0.368	0.111	4.2934e-11
macrophage/microglia	Crlf3	0.592261	8.51866e-07	0.274	0.055	5.66966e-11
macrophage/microglia	Limd2	0.789099	9.30552e-07	0.379	0.113	6.19336e-11
macrophage/microglia	Sirpa	0.988704	9.70234e-07	0.337	0.099	6.45747e-11
macrophage/microglia	Bin1	0.907866	9.70738e-07	0.347	0.104	6.46082e-11
macrophage/microglia	Asah1	0.991734	1.24583e-06	0.4	0.143	8.29169e-11
macrophage/microglia	Clec2d	0.630633	1.31438e-06	0.274	0.055	8.74795e-11
macrophage/microglia	Rps16	0.378465	1.35885e-06	0.958	0.864	9.04393e-11
macrophage/microglia	Cdc42	0.789028	1.48756e-06	0.632	0.356	9.90053e-11
macrophage/microglia	Frmd4b	0.949786	2.14541e-06	0.274	0.065	1.42789e-10
macrophage/microglia	Gm26916	1.06741	2.39081e-06	0.4	0.143	1.59122e-10
macrophage/microglia	Skil	1.02073	2.78427e-06	0.4	0.148	1.85309e-10
macrophage/microglia	Prcp	0.696438	3.83252e-06	0.295	0.074	2.55076e-10
macrophage/microglia	Arpc5	0.704791	4.66433e-06	0.432	0.152	3.10438e-10
macrophage/microglia	Rps5	0.471076	5.82529e-06	0.895	0.764	3.87706e-10
macrophage/microglia	Ehd4	0.672649	6.09897e-06	0.274	0.062	4.05921e-10
macrophage/microglia	Ivns1abp	0.83396	6.11511e-06	0.432	0.182	4.06995e-10
macrophage/microglia	Rps9	0.534293	9.50945e-06	0.916	0.824	6.32909e-10
macrophage/microglia	Cotl1	0.701438	9.57982e-06	0.421	0.155	6.37592e-10
macrophage/microglia	Pfn1	0.436653	1.05768e-05	0.779	0.557	7.03944e-10
macrophage/microglia	Akap13	0.904105	1.43131e-05	0.432	0.173	9.52621e-10
macrophage/microglia	Rpl23	0.374956	1.86854e-05	0.989	0.915	1.24362e-09
macrophage/microglia	Peli1	0.814318	2.01899e-05	0.326	0.099	1.34375e-09
macrophage/microglia	Neat1	1.02163	2.0965e-05	0.537	0.259	1.39534e-09
macrophage/microglia	Ntpcr	0.859535	2.16719e-05	0.274	0.072	1.44239e-09
macrophage/microglia	P2rx4	0.843918	2.27645e-05	0.305	0.09	1.51511e-09
macrophage/microglia	Psme1	0.831975	2.6534e-05	0.516	0.254	1.76599e-09
macrophage/microglia	Ptp4a2	0.84099	2.71717e-05	0.421	0.176	1.80843e-09
macrophage/microglia	Junb	0.831359	3.85245e-05	0.716	0.469	2.56402e-09
macrophage/microglia	Sft2d1	0.807167	4.84192e-05	0.347	0.118	3.22257e-09
macrophage/microglia	H3f3b	0.657341	4.99635e-05	0.811	0.76	3.32536e-09
macrophage/microglia	Lgals3bp	0.839056	5.44315e-05	0.4	0.164	3.62273e-09
macrophage/microglia	Apobec3	0.70113	6.1294e-05	0.389	0.145	4.07947e-09
macrophage/microglia	Ier5	0.806891	6.60868e-05	0.316	0.099	4.39846e-09
macrophage/microglia	Pabpc1	0.657732	8.25711e-05	0.758	0.589	5.49558e-09
macrophage/microglia	Rps3	0.377235	8.51813e-05	0.926	0.813	5.66931e-09
macrophage/microglia	Cfl1	0.58296	0.000172443	0.768	0.607	1.14771e-08
macrophage/microglia	Uba52	0.482293	0.000194267	0.842	0.714	1.29296e-08
macrophage/microglia	Cmtm7	0.584856	0.000202734	0.253	0.062	1.34931e-08
macrophage/microglia	Gltp	0.728211	0.000214908	0.284	0.085	1.43034e-08
macrophage/microglia	Glul	0.742551	0.000225236	0.432	0.189	1.49907e-08
macrophage/microglia	Jun	0.871572	0.000249971	0.6	0.36	1.6637e-08
macrophage/microglia	Rpl10	0.439847	0.000282738	0.895	0.771	1.88178e-08
macrophage/microglia	Ccnl1	0.878656	0.000335343	0.463	0.231	2.2319e-08
macrophage/microglia	Tmem55b	0.755928	0.000387363	0.326	0.118	2.57813e-08
macrophage/microglia	Il10rb	0.732659	0.00043543	0.263	0.074	2.89804e-08
macrophage/microglia	Ptpn1	0.696746	0.000496833	0.284	0.09	3.30671e-08
macrophage/microglia	Dock10	0.80478	0.000527873	0.347	0.132	3.5133e-08
macrophage/microglia	Gdi2	0.742098	0.000539165	0.495	0.263	3.58845e-08
macrophage/microglia	Rpl34	0.343982	0.00073404	0.947	0.861	4.88545e-08
macrophage/microglia	Arpc2	0.660185	0.000862961	0.537	0.307	5.7435e-08
macrophage/microglia	Apbb1ip	0.588128	0.00087402	0.253	0.069	5.81711e-08
macrophage/microglia	Picalm	0.911557	0.000915448	0.411	0.194	6.09283e-08
macrophage/microglia	Ctsl	0.826032	0.00099187	0.611	0.4	6.60146e-08
macrophage/microglia	Tanc2	0.757203	0.00110985	0.253	0.074	7.38672e-08
macrophage/microglia	Gpx1	0.770887	0.00111427	0.526	0.319	7.41609e-08
macrophage/microglia	Rgs2	0.829708	0.00144658	0.442	0.212	9.6278e-08
macrophage/microglia	Tmem176b	0.646035	0.00221287	0.642	0.43	1.47279e-07
macrophage/microglia	Cd81	0.696664	0.00224002	0.768	0.607	1.49086e-07
macrophage/microglia	Gm13166	0.608184	0.00229114	0.263	0.079	1.52489e-07
macrophage/microglia	Adrb2	0.892793	0.00242103	0.274	0.092	1.61133e-07
macrophage/microglia	Ssh2	1.00839	0.00290269	0.4	0.199	1.93191e-07
macrophage/microglia	Nfkbiz	0.896718	0.00291291	0.316	0.122	1.93871e-07
macrophage/microglia	Rps28	0.291574	0.00332392	0.989	0.931	2.21226e-07
macrophage/microglia	Pik3r1	0.686228	0.00338352	0.368	0.164	2.25192e-07
macrophage/microglia	Rps10	0.367468	0.00340758	0.916	0.806	2.26794e-07
macrophage/microglia	Zfp36l1	0.764199	0.00340948	0.379	0.159	2.2692e-07
macrophage/microglia	Socs3	0.95146	0.00362754	0.474	0.261	2.41434e-07
macrophage/microglia	Camk1	0.79834	0.00365142	0.326	0.129	2.43023e-07
macrophage/microglia	Clta	0.664148	0.00381326	0.589	0.383	2.53794e-07
macrophage/microglia	F11r	0.861599	0.00405038	0.526	0.321	2.69576e-07
macrophage/microglia	Klf6	0.901344	0.00434944	0.379	0.164	2.8948e-07
macrophage/microglia	Npc2	0.457113	0.00535985	0.768	0.55	3.56729e-07
macrophage/microglia	Sparc	0.791581	0.00570553	0.505	0.291	3.79736e-07
macrophage/microglia	Rac2	0.307486	0.00627355	0.295	0.09	4.17541e-07
macrophage/microglia	Rnaset2a	0.683383	0.0062901	0.526	0.33	4.18642e-07
macrophage/microglia	Cmtm6	0.747616	0.00677142	0.274	0.099	4.50677e-07
macrophage/microglia	Gm11808	0.463129	0.00730322	0.758	0.582	4.86071e-07
macrophage/microglia	Syngr2	0.724854	0.00842925	0.337	0.143	5.61015e-07
macrophage/microglia	Wasf2	0.713288	0.00901067	0.326	0.134	5.99712e-07
macrophage/microglia	Btg1	0.574279	0.00960786	0.632	0.446	6.39458e-07
macrophage/microglia	Vmp1	0.832327	0.00982549	0.389	0.187	6.53943e-07
macrophage/microglia	Rpl11	0.291683	0.014133	0.958	0.871	9.4063e-07
macrophage/microglia	Rps27a	0.285283	0.0147648	0.979	0.952	9.82682e-07
macrophage/microglia	Wnk1	0.709995	0.0160277	0.568	0.358	1.06674e-06
macrophage/microglia	Nmt1	0.664934	0.0195759	0.547	0.383	1.30289e-06
macrophage/microglia	Scamp2	0.730872	0.0208708	0.253	0.088	1.38907e-06
macrophage/microglia	Rpl21	0.326656	0.021987	0.947	0.875	1.46336e-06
macrophage/microglia	Rap1b	0.651052	0.024372	0.389	0.185	1.6221e-06
macrophage/microglia	Rpl27a	0.312355	0.0298754	0.968	0.91	1.98838e-06
macrophage/microglia	Git2	0.644755	0.0315363	0.347	0.152	2.09892e-06
macrophage/microglia	Mcl1	0.695437	0.0341216	0.316	0.136	2.27099e-06
macrophage/microglia	Lpl	0.814097	0.0496725	0.274	0.111	3.30599e-06
macrophage/microglia	Stab1	0.730234	0.0505828	0.316	0.143	3.36658e-06
macrophage/microglia	Rpl13	0.270132	0.0515781	0.979	0.924	3.43282e-06
macrophage/microglia	Tnpo3	0.716476	0.0557223	0.389	0.201	3.70864e-06
macrophage/microglia	Rps3a1	0.34614	0.0649856	0.937	0.811	4.32517e-06
macrophage/microglia	Clic1	0.77634	0.0754307	0.453	0.261	5.02035e-06
macrophage/microglia	Id2	0.738687	0.0836345	0.389	0.196	5.56635e-06
macrophage/microglia	Arpc3	0.687031	0.100566	0.442	0.254	6.69324e-06
macrophage/microglia	Rps12-ps3	0.446733	0.10659	0.684	0.522	7.09419e-06
macrophage/microglia	Rpl3	0.313274	0.114464	0.863	0.721	7.61821e-06
macrophage/microglia	Rpl23a-ps3	0.2932	0.11467	0.916	0.811	7.63198e-06
macrophage/microglia	Zfhx3	0.680004	0.115421	0.495	0.333	7.6819e-06
macrophage/microglia	Dazap2	0.561151	0.154024	0.358	0.176	1.02511e-05
macrophage/microglia	Rpl22	0.41353	0.229732	0.779	0.711	1.529e-05
macrophage/microglia	Msn	0.523023	0.319712	0.305	0.132	2.12787e-05
macrophage/microglia	Vasp	0.565539	0.330368	0.263	0.106	2.19879e-05
macrophage/microglia	Gng5	0.472153	0.397323	0.695	0.573	2.64441e-05
macrophage/microglia	Cox7a2l	0.588607	0.431143	0.621	0.46	2.86951e-05
macrophage/microglia	Rpl29	0.402996	0.488763	0.695	0.559	3.253e-05
macrophage/microglia	Pecam1	0.521557	0.502902	0.684	0.573	3.3471e-05
macrophage/microglia	Sh3glb1	0.534679	0.525625	0.463	0.277	3.49834e-05
macrophage/microglia	Ppt1	0.575057	0.635823	0.474	0.305	4.23177e-05
macrophage/microglia	Atf3	1.1585	0.660707	0.274	0.127	4.39738e-05
macrophage/microglia	Rps6	0.299162	0.711286	0.895	0.797	4.73401e-05
macrophage/microglia	Ostf1	0.544129	0.826777	0.263	0.113	5.50267e-05
macrophage/microglia	Actr2	0.630809	0.885869	0.411	0.245	5.89597e-05
macrophage/microglia	Frmd4a	0.619876	0.943928	0.358	0.196	6.28238e-05
macrophage/microglia	Mef2a	0.61061	0.973067	0.295	0.145	6.47632e-05
macrophage/microglia	Rps26	0.309928	0.992777	0.853	0.794	6.6075e-05
macrophage/microglia	Rps13	0.262444	1	0.884	0.806	6.72908e-05
macrophage/microglia	Stx7	0.778966	1	0.305	0.159	7.46769e-05
macrophage/microglia	Gns	0.590816	1	0.316	0.164	8.58492e-05
macrophage/microglia	Stat1	0.596676	1	0.305	0.148	0.000110342
macrophage/microglia	Stx16	0.500587	1	0.316	0.166	0.000131741
macrophage/microglia	H2-Q7	0.299863	1	0.295	0.127	0.00013241
macrophage/microglia	Rps7	0.259479	1	0.863	0.801	0.000148322
macrophage/microglia	Rhob	0.638892	1	0.284	0.143	0.000169724
macrophage/microglia	Ywhah	0.604012	1	0.358	0.212	0.000187194
macrophage/microglia	Lamtor1	0.565062	1	0.305	0.166	0.000213105
macrophage/microglia	Cflar	0.65788	1	0.337	0.199	0.000243929
macrophage/microglia	Psmb9	0.484361	1	0.253	0.115	0.000285877
macrophage/microglia	Blvrb	0.569733	1	0.274	0.139	0.000299451
macrophage/microglia	Sdf2l1	0.649689	1	0.274	0.143	0.000328286
macrophage/microglia	Erp29	0.76261	1	0.4	0.273	0.000380492
macrophage/microglia	Maf	0.599257	1	0.6	0.42	0.000390001
macrophage/microglia	Jak1	0.481662	1	0.316	0.176	0.00048967
macrophage/microglia	Itgb5	0.547169	1	0.295	0.157	0.000566199
macrophage/microglia	Ccdc12	0.440029	1	0.442	0.3	0.00062254
macrophage/microglia	Gm2a	0.573154	1	0.337	0.199	0.000651096
macrophage/microglia	Actr3	0.472392	1	0.411	0.273	0.000657189
macrophage/microglia	2810474O19Rik	0.584897	1	0.253	0.129	0.000729139
macrophage/microglia	Rtcb	0.550323	1	0.295	0.173	0.00075498
macrophage/microglia	Rplp2	0.288556	1	0.737	0.691	0.000784573
macrophage/microglia	Capzb	0.454057	1	0.411	0.268	0.000836469
macrophage/microglia	Atp2c1	0.45756	1	0.295	0.162	0.000864708
macrophage/microglia	Gnb2l1	0.347663	1	0.611	0.545	0.000985807
macrophage/microglia	Slc3a2	0.464384	1	0.316	0.185	0.00102532
macrophage/microglia	Egr1	0.462779	1	0.537	0.372	0.00107873
macrophage/microglia	Ubc	0.621092	1	0.663	0.621	0.00121453
macrophage/microglia	Gm9493	0.280642	1	0.737	0.681	0.00132064
macrophage/microglia	Ppp1ca	0.451829	1	0.379	0.252	0.00146211
macrophage/microglia	Abca1	0.48982	1	0.326	0.201	0.00162298
macrophage/microglia	Tln1	0.318985	1	0.284	0.157	0.00180609
macrophage/microglia	Rpl35	0.416544	1	0.611	0.568	0.00196554
macrophage/microglia	Ier2	0.462062	1	0.505	0.379	0.00198567
macrophage/microglia	Tmem176a	0.525955	1	0.516	0.423	0.00209292
macrophage/microglia	Rpl23a	0.28036	1	0.758	0.718	0.00215175
macrophage/microglia	Ifitm3	0.362794	1	0.505	0.351	0.0024161
macrophage/microglia	Rpl15	0.313753	1	0.768	0.732	0.00242831
macrophage/microglia	Rpl4	0.258933	1	0.779	0.732	0.00255348
macrophage/microglia	Btg2	0.413084	1	0.632	0.506	0.00286146
macrophage/microglia	Ppp1r15a	0.544344	1	0.263	0.152	0.00358485
macrophage/microglia	Rpl12	0.26011	1	0.747	0.739	0.00384391
macrophage/microglia	Mtdh	0.432523	1	0.442	0.349	0.00425709
macrophage/microglia	Rhoa	0.429659	1	0.495	0.43	0.00471679
macrophage/microglia	Asph	0.519284	1	0.253	0.157	0.00615338
macrophage/microglia	Ssr4	0.343549	1	0.516	0.397	0.00648123
macrophage/microglia	Rps2	0.251843	1	0.747	0.684	0.00663296
macrophage/microglia	Tor1aip1	0.386671	1	0.432	0.337	0.00683149
macrophage/microglia	Pea15a	0.422063	1	0.316	0.212	0.00799622
macrophage/microglia	Tra2a	0.283101	1	0.453	0.342	0.00842166
macrophage/microglia	Slc25a5	0.443816	1	0.379	0.284	0.0086611
macrophage/microglia	Bzw1	0.474689	1	0.274	0.176	0.00907702
macrophage/microglia	Gm10036	0.383772	1	0.442	0.36	0.00924027
macrophage/microglia	Tpd52	0.503996	1	0.284	0.196	0.00990574
macrophage/microglia	Fos	0.538051	1	0.621	0.49	0.00997777
T-cell like	Nkg7	2.81016	4.90707e-76	0.762	0.006	3.26593e-80
T-cell like	Ms4a4b	2.67058	6.76028e-75	0.714	0.002	4.49936e-79
T-cell like	Gimap4	2.39288	1.07984e-73	0.762	0.008	7.18697e-78
T-cell like	Gimap3	2.10068	2.25729e-69	0.667	0.002	1.50236e-73
T-cell like	Ccl5	4.40113	2.8983e-64	0.905	0.045	1.92898e-68
T-cell like	Cd3g	2.07823	1.21402e-63	0.595	0	8.08001e-68
T-cell like	Hcst	2.25612	1.17088e-60	0.714	0.016	7.79289e-65
T-cell like	Cd3d	2.19654	3.44517e-59	0.619	0.006	2.29296e-63
T-cell like	Cxcr6	1.83482	7.22028e-53	0.548	0.004	4.80551e-57
T-cell like	Ptpn22	2.32988	3.21095e-49	0.643	0.021	2.13707e-53
T-cell like	Cd3e	1.74783	2.57775e-47	0.476	0.002	1.71564e-51
T-cell like	Ptprcap	1.67211	2.93821e-47	0.5	0.004	1.95555e-51
T-cell like	Ctsw	1.6504	3.17309e-47	0.452	0	2.11188e-51
T-cell like	AW112010	3.0502	4.32853e-47	0.976	0.123	2.88088e-51
T-cell like	Rac2	2.16435	1.45814e-43	0.81	0.068	9.70474e-48
T-cell like	Lck	1.76612	2.9242e-41	0.571	0.021	1.94622e-45
T-cell like	Stk17b	1.67525	1.03863e-39	0.595	0.027	6.91267e-44
T-cell like	Thy1	1.63355	1.08693e-39	0.5	0.012	7.23415e-44
T-cell like	Il2rb	1.25218	3.79454e-39	0.381	0	2.52549e-43
T-cell like	Cd8b1	1.79443	7.62418e-37	0.405	0.004	5.07433e-41
T-cell like	Cd28	1.25916	1.79071e-36	0.357	0	1.19182e-40
T-cell like	Lat	1.4967	1.5266e-34	0.405	0.006	1.01604e-38
T-cell like	Ms4a6b	1.71681	5.28449e-34	0.595	0.037	3.51713e-38
T-cell like	Ltb	1.65376	1.34339e-32	0.405	0.008	8.94103e-37
T-cell like	Cd8a	1.52722	4.82851e-32	0.381	0.006	3.21365e-36
T-cell like	Ctla2a	1.59087	4.96289e-32	0.548	0.029	3.30309e-36
T-cell like	H2-Q7	1.79945	4.15939e-31	0.786	0.103	2.76832e-35
T-cell like	Cnn2	1.68503	6.09577e-31	0.595	0.045	4.05709e-35
T-cell like	Cd52	2.2036	6.15207e-31	0.976	0.198	4.09456e-35
T-cell like	Klrd1	1.6408	3.08185e-29	0.357	0.006	2.05115e-33
T-cell like	S100a6	2.11803	7.36369e-29	0.667	0.07	4.90096e-33
T-cell like	Xcl1	1.76568	1.74682e-28	0.31	0.002	1.16261e-32
T-cell like	Ptprc	1.83774	2.20225e-28	0.786	0.111	1.46572e-32
T-cell like	Rgs1	2.12227	2.96763e-28	0.5	0.029	1.97513e-32
T-cell like	Mndal	1.75599	6.59857e-28	0.571	0.045	4.39173e-32
T-cell like	Gimap1	1.5691	1.46875e-26	0.405	0.016	9.77538e-31
T-cell like	Bcl11b	1.13399	1.58668e-26	0.333	0.006	1.05603e-30
T-cell like	Tmsb10	2.50478	5.627e-25	0.976	0.399	3.74509e-29
T-cell like	Runx3	1.15381	7.80415e-25	0.333	0.008	5.19411e-29
T-cell like	Coro1a	1.59841	2.0442e-24	0.714	0.105	1.36053e-28
T-cell like	Gimap6	1.21973	5.15305e-24	0.452	0.027	3.42965e-28
T-cell like	Ly6c2	2.24211	6.98493e-24	0.405	0.021	4.64888e-28
T-cell like	Gm9844	1.70793	1.24956e-22	0.667	0.103	8.31657e-27
T-cell like	Cst7	1.11255	5.06733e-22	0.31	0.008	3.3726e-26
T-cell like	Txk	1.42846	5.54906e-22	0.405	0.025	3.69322e-26
T-cell like	S100a4	1.52528	2.34336e-21	0.381	0.021	1.55964e-25
T-cell like	Arhgdib	1.57174	2.43316e-21	0.643	0.091	1.61941e-25
T-cell like	Rps27rt	1.3242	3.95712e-21	1	0.953	2.63369e-25
T-cell like	Rpl13a	1.37831	5.01363e-21	1	0.92	3.33686e-25
T-cell like	Sp100	1.32535	5.33333e-21	0.524	0.053	3.54963e-25
T-cell like	Rps24	1.45288	5.95691e-21	1	0.87	3.96467e-25
T-cell like	Plac8	1.15908	1.8159e-20	0.31	0.01	1.20858e-24
T-cell like	S100a10	1.68909	5.54741e-20	0.619	0.095	3.69212e-24
T-cell like	Gimap5	1.09511	7.068e-20	0.286	0.008	4.70416e-24
T-cell like	Ptpn7	0.926849	9.4425e-20	0.286	0.008	6.28453e-24
T-cell like	Rps15a	1.39267	1.51832e-19	1	0.907	1.01053e-23
T-cell like	Pfn1	1.6955	3.30106e-19	0.976	0.564	2.19704e-23
T-cell like	Tbc1d10c	1.13827	3.9072e-19	0.262	0.006	2.60047e-23
T-cell like	Rpl32	1.20349	4.77648e-19	1	0.905	3.17902e-23
T-cell like	Lsp1	1.311	5.56591e-19	0.452	0.041	3.70443e-23
T-cell like	Ifi203	1.51643	5.94248e-19	0.476	0.047	3.95506e-23
T-cell like	Rasal3	0.813798	6.52207e-19	0.262	0.006	4.34081e-23
T-cell like	Mbnl1	1.63374	9.18312e-19	0.857	0.263	6.11189e-23
T-cell like	Rinl	1.23243	2.50618e-18	0.381	0.027	1.66801e-22
T-cell like	Rpl18a	1.3298	1.55622e-17	1	0.858	1.03575e-21
T-cell like	Rps16	1.18872	2.01664e-17	1	0.87	1.34219e-21
T-cell like	Rps18	1.24595	2.24452e-17	0.976	0.862	1.49386e-21
T-cell like	Crip1	1.76394	2.26045e-17	0.738	0.185	1.50446e-21
T-cell like	Rps13	1.38114	2.51787e-17	1	0.805	1.67578e-21
T-cell like	Lcp1	1.35121	2.85723e-17	0.643	0.105	1.90165e-21
T-cell like	Sh3bgrl3	1.60764	3.15605e-17	0.929	0.414	2.10053e-21
T-cell like	Rpl37a	0.97193	3.52665e-17	1	0.971	2.34719e-21
T-cell like	Ptpn18	1.60532	4.2495e-17	0.786	0.21	2.82829e-21
T-cell like	Wdr89	1.11014	4.31198e-17	1	0.862	2.86987e-21
T-cell like	Rpl39	1.03458	7.89361e-17	1	0.975	5.25365e-21
T-cell like	Rps23	1.05018	1.32426e-16	1	0.92	8.81368e-21
T-cell like	Rpsa	1.15743	1.53614e-16	1	0.706	1.02239e-20
T-cell like	Rpl13	0.966368	2.37974e-16	1	0.928	1.58385e-20
T-cell like	Gpsm3	1.11731	2.93099e-16	0.452	0.049	1.95074e-20
T-cell like	Rps11	1.15628	4.53411e-16	1	0.887	3.01771e-20
T-cell like	Itgal	1.01435	4.79749e-16	0.262	0.01	3.193e-20
T-cell like	Rpl12	1.37228	5.82106e-16	0.976	0.72	3.87425e-20
T-cell like	Rpl34	1.05439	2.29299e-15	1	0.866	1.52611e-19
T-cell like	Rpl17	1.1307	2.46186e-15	1	0.868	1.63851e-19
T-cell like	Skap1	1.23017	4.92565e-15	0.31	0.021	3.27831e-19
T-cell like	Sp110	1.19557	8.92383e-15	0.5	0.07	5.93932e-19
T-cell like	Shisa5	1.72724	1.07752e-14	0.714	0.206	7.17154e-19
T-cell like	Fxyd5	1.04831	1.20228e-14	0.452	0.053	8.00185e-19
T-cell like	Sh2d2a	0.812149	1.61784e-14	0.262	0.012	1.07677e-18
T-cell like	Psmb8	1.29451	1.91652e-14	0.69	0.165	1.27556e-18
T-cell like	Rpl23	0.970441	2.12563e-14	1	0.922	1.41473e-18
T-cell like	Rps15	1.05441	2.19119e-14	1	0.879	1.45836e-18
T-cell like	Akna	1.22723	2.3304e-14	0.476	0.066	1.55101e-18
T-cell like	Rpl27a	0.916865	2.69879e-14	1	0.914	1.7962e-18
T-cell like	Uba52	1.16019	3.34847e-14	0.976	0.716	2.2286e-18
T-cell like	Rps3a1	1.04648	4.14359e-14	0.976	0.821	2.7578e-18
T-cell like	Bcl2	1.68459	4.32865e-14	0.571	0.111	2.88096e-18
T-cell like	Rps14	0.931848	4.79719e-14	1	0.885	3.1928e-18
T-cell like	Rpl19	1.06092	9.23036e-14	1	0.844	6.14333e-18
T-cell like	Il2rg	1.06809	1.00996e-13	0.31	0.023	6.72188e-18
T-cell like	Gm4955	1.08071	2.39087e-13	0.286	0.019	1.59126e-17
T-cell like	Tmsb4x	1.20426	2.68141e-13	1	0.819	1.78463e-17
T-cell like	Rpl36	0.934297	3.2004e-13	1	0.874	2.13005e-17
T-cell like	Selplg	1.16582	3.33776e-13	0.595	0.111	2.22147e-17
T-cell like	Rplp1	0.884403	3.4758e-13	1	0.942	2.31334e-17
T-cell like	Rps5	1.15336	6.02325e-13	0.976	0.772	4.00882e-17
T-cell like	Rps7	1.18741	6.06848e-13	1	0.796	4.03892e-17
T-cell like	Rpl35a	0.786462	7.64558e-13	1	0.92	5.08857e-17
T-cell like	Rps18-ps3	1.22009	1.55826e-12	0.905	0.475	1.03711e-16
T-cell like	Srgn	1.5066	1.6691e-12	0.5	0.088	1.11088e-16
T-cell like	Rps8	0.874383	1.72426e-12	1	0.916	1.14759e-16
T-cell like	Rpl27	1.10207	2.19461e-12	0.976	0.71	1.46064e-16
T-cell like	Rps10	1.00687	2.32098e-12	0.976	0.813	1.54474e-16
T-cell like	Rps4x	1.0029	3.48434e-12	0.976	0.835	2.31903e-16
T-cell like	Ppp1r16b	0.822304	4.06862e-12	0.262	0.016	2.7079e-16
T-cell like	AI662270	0.939303	4.19241e-12	0.31	0.027	2.79029e-16
T-cell like	Rpl36-ps3	0.939166	4.22257e-12	0.976	0.77	2.81036e-16
T-cell like	Tpt1	0.748437	8.43604e-12	0.976	0.942	5.61467e-16
T-cell like	Rps6	1.02585	8.96826e-12	0.976	0.8	5.96889e-16
T-cell like	S100a11	1.15006	9.62266e-12	0.69	0.193	6.40443e-16
T-cell like	Rpl38	0.773243	1.07965e-11	1	0.967	7.18566e-16
T-cell like	Rps3	1.0839	1.09728e-11	0.976	0.821	7.30302e-16
T-cell like	Rpl13a-ps1	1.29111	1.2606e-11	0.786	0.333	8.39004e-16
T-cell like	Lpxn	0.92722	1.27698e-11	0.286	0.023	8.499e-16
T-cell like	Rpl22	1.06576	1.33973e-11	0.952	0.704	8.91667e-16
T-cell like	Rpl3	1.00543	1.36278e-11	0.952	0.728	9.07008e-16
T-cell like	Rps19	1.02862	1.41541e-11	0.976	0.874	9.42038e-16
T-cell like	Gm9843	1.06897	2.35661e-11	0.976	0.681	1.56846e-15
T-cell like	Wipf1	1.00058	7.83573e-11	0.405	0.058	5.21513e-15
T-cell like	Rps27	1.17967	8.06012e-11	0.905	0.578	5.36447e-15
T-cell like	Cotl1	1.41886	1.01744e-10	0.619	0.167	6.77167e-15
T-cell like	Rpl11	0.890471	2.25353e-10	0.976	0.879	1.49986e-14
T-cell like	Rplp2	1.03043	2.45165e-10	0.905	0.681	1.63172e-14
T-cell like	Eif3e	1.15483	2.7393e-10	0.762	0.321	1.82316e-14
T-cell like	Rpl30	0.908874	3.89652e-10	0.952	0.84	2.59336e-14
T-cell like	B4galnt1	1.05694	4.09102e-10	0.31	0.033	2.72281e-14
T-cell like	Gm11808	1.17225	5.90584e-10	0.881	0.591	3.93068e-14
T-cell like	Rpl14	0.823972	7.87013e-10	0.976	0.84	5.23802e-14
T-cell like	Rpl4	1.07179	9.13562e-10	0.905	0.726	6.08028e-14
T-cell like	Gm9493	1.18082	1.14264e-09	0.905	0.673	7.60495e-14
T-cell like	Rpl23a-ps3	0.965633	1.48327e-09	0.952	0.819	9.87203e-14
T-cell like	Rps27a	0.738679	2.23802e-09	1	0.953	1.48953e-13
T-cell like	Rpl18	1.16168	2.31573e-09	0.929	0.704	1.54125e-13
T-cell like	H2-K1	1.04824	2.60395e-09	0.905	0.496	1.73308e-13
T-cell like	Rps20	0.909696	2.99082e-09	0.976	0.879	1.99056e-13
T-cell like	Rpl27-ps3	1.01515	3.2208e-09	0.905	0.681	2.14363e-13
T-cell like	Fgl2	1.132	4.65403e-09	0.31	0.037	3.09753e-13
T-cell like	B2m	0.892793	8.8533e-09	1	0.634	5.89238e-13
T-cell like	Eef1a1	0.709771	1.17035e-08	1	0.928	7.78938e-13
T-cell like	Rpl8	0.827973	1.37306e-08	0.952	0.823	9.13848e-13
T-cell like	Rps28	0.716574	1.4998e-08	0.976	0.938	9.98203e-13
T-cell like	Rpl21	0.794096	1.54015e-08	1	0.879	1.02506e-12
T-cell like	Rps9	0.746352	1.65769e-08	0.952	0.831	1.10329e-12
T-cell like	Cd37	0.946583	2.51063e-08	0.333	0.047	1.67097e-12
T-cell like	Id2	1.41843	3.58518e-08	0.619	0.198	2.38614e-12
T-cell like	Samsn1	1.11785	3.67083e-08	0.31	0.041	2.44315e-12
T-cell like	Rpl37	0.595823	7.24034e-08	1	0.973	4.81886e-12
T-cell like	Rps25	0.638695	9.64736e-08	0.976	0.883	6.42087e-12
T-cell like	Cd48	0.962315	1.41568e-07	0.333	0.051	9.42213e-12
T-cell like	H2-D1	0.783353	1.6126e-07	0.929	0.484	1.07328e-11
T-cell like	Rps29	0.53934	1.9066e-07	1	0.992	1.26895e-11
T-cell like	Rpl5	0.97789	2.92945e-07	0.857	0.626	1.94972e-11
T-cell like	Emp3	0.95214	3.15069e-07	0.333	0.053	2.09696e-11
T-cell like	Actb	1.49268	5.03451e-07	1	0.862	3.35075e-11
T-cell like	Sept1	1.13232	5.78593e-07	0.333	0.056	3.85087e-11
T-cell like	Rplp0	0.983151	9.78468e-07	0.929	0.792	6.51226e-11
T-cell like	Dock2	0.876439	1.15338e-06	0.262	0.033	7.67642e-11
T-cell like	Hmgb2	1.47526	1.21148e-06	0.429	0.107	8.06311e-11
T-cell like	Psmb9	1.09208	1.62001e-06	0.452	0.113	1.07821e-10
T-cell like	Rpl10a	1.06559	1.78254e-06	0.905	0.7	1.18638e-10
T-cell like	Rpl28	0.793845	2.02112e-06	0.976	0.831	1.34517e-10
T-cell like	Rpl6	0.66817	2.52862e-06	0.976	0.918	1.68294e-10
T-cell like	Fau	0.926678	3.27607e-06	0.833	0.521	2.18041e-10
T-cell like	Gmfg	0.907715	5.53315e-06	0.381	0.078	3.68263e-10
T-cell like	Zyx	1.01522	6.08102e-06	0.31	0.056	4.04727e-10
T-cell like	Rpl29	0.868371	6.48827e-06	0.881	0.558	4.31832e-10
T-cell like	Rps17	0.608507	7.06395e-06	0.976	0.877	4.70146e-10
T-cell like	Rps26	0.696369	7.36019e-06	0.952	0.792	4.89863e-10
T-cell like	Epsti1	1.04022	8.04753e-06	0.31	0.053	5.3561e-10
T-cell like	Rpl36a	0.775375	9.18438e-06	0.952	0.85	6.11273e-10
T-cell like	Gnb2l1	1.10107	1.08336e-05	0.786	0.537	7.21041e-10
T-cell like	Abracl	1.10545	1.45456e-05	0.381	0.088	9.68093e-10
T-cell like	Nabp1	1.14208	1.79704e-05	0.333	0.07	1.19603e-09
T-cell like	Slfn2	0.834902	2.06103e-05	0.286	0.047	1.37173e-09
T-cell like	Hmha1	0.907719	2.10906e-05	0.333	0.064	1.4037e-09
T-cell like	Rpl7	0.755216	4.04247e-05	0.976	0.788	2.6905e-09
T-cell like	Rpl23a	0.751682	4.79709e-05	0.905	0.71	3.19274e-09
T-cell like	Ly6a	0.970074	4.95428e-05	0.381	0.088	3.29736e-09
T-cell like	Rbm3	1.11002	5.58935e-05	0.619	0.29	3.72003e-09
T-cell like	Fyb	0.63556	6.56077e-05	0.5	0.138	4.36657e-09
T-cell like	Ahnak	0.958671	7.56942e-05	0.357	0.08	5.03789e-09
T-cell like	Arhgap30	0.775105	7.62507e-05	0.286	0.049	5.07492e-09
T-cell like	Rpl26	0.514434	8.60176e-05	0.976	0.934	5.72496e-09
T-cell like	Rps21	0.483737	9.34337e-05	0.976	0.938	6.21855e-09
T-cell like	Rps2	0.98057	0.000113737	0.833	0.683	7.56984e-09
T-cell like	Tagln2	0.772438	0.000125103	0.357	0.08	8.32633e-09
T-cell like	Akap13	1.05165	0.000178238	0.524	0.193	1.18628e-08
T-cell like	Btg1	1.33338	0.000195629	0.738	0.457	1.30203e-08
T-cell like	Cd27	1.20544	0.000211051	0.476	0.156	1.40467e-08
T-cell like	Limd2	0.971597	0.000809709	0.429	0.138	5.38908e-08
T-cell like	Rpl9-ps6	0.793678	0.00103815	0.786	0.595	6.90951e-08
T-cell like	Psmb10	0.831714	0.00139749	0.333	0.084	9.30107e-08
T-cell like	Ankrd44	1.05907	0.00219612	0.476	0.177	1.46164e-07
T-cell like	Apobec3	0.838241	0.00236533	0.476	0.165	1.57426e-07
T-cell like	Cd53	0.762533	0.0026307	0.429	0.126	1.75088e-07
T-cell like	Lgals1	1.35205	0.00328024	0.405	0.134	2.18319e-07
T-cell like	Rpl41	0.365322	0.00439425	1	0.961	2.92462e-07
T-cell like	Tnfaip8	0.911553	0.00524495	0.286	0.066	3.49082e-07
T-cell like	Ppia	0.715018	0.00739401	0.929	0.829	4.92114e-07
T-cell like	Pabpc1	0.703153	0.00759981	0.81	0.603	5.05811e-07
T-cell like	Fli1	0.547813	0.0107869	0.286	0.064	7.17933e-07
T-cell like	Rpl24	0.588236	0.0115241	0.905	0.86	7.66998e-07
T-cell like	Cfl1	0.612909	0.012789	0.833	0.619	8.51182e-07
T-cell like	Itgb2	0.781848	0.012825	0.262	0.058	8.53576e-07
T-cell like	Trim12a	0.710963	0.0129982	0.333	0.091	8.65106e-07
T-cell like	Rpl31	0.470102	0.0143352	0.976	0.909	9.54092e-07
T-cell like	Myl6	0.752245	0.0145809	0.762	0.535	9.70442e-07
T-cell like	Ubxn11	0.726445	0.0148291	0.262	0.06	9.86963e-07
T-cell like	Actg1	0.685173	0.0153741	0.833	0.708	1.02324e-06
T-cell like	Rpl15	0.737707	0.0170612	0.881	0.726	1.13552e-06
T-cell like	Laptm5	0.656271	0.0174772	0.5	0.173	1.16321e-06
T-cell like	Vim	0.937664	0.0182358	0.357	0.111	1.2137e-06
T-cell like	S100a13	0.744449	0.0338921	0.452	0.181	2.25571e-06
T-cell like	Actr2	0.811637	0.0356024	0.548	0.251	2.36954e-06
T-cell like	Vasp	0.840512	0.0401654	0.357	0.115	2.67324e-06
T-cell like	H2-T22	0.860171	0.0443166	0.357	0.117	2.94953e-06
T-cell like	Npm1	0.798355	0.0451693	0.69	0.506	3.00628e-06
T-cell like	Snrpg	0.751307	0.0482309	0.762	0.547	3.21004e-06
T-cell like	Actr3	0.81266	0.0687839	0.548	0.276	4.57796e-06
T-cell like	Cyba	0.689933	0.112971	0.571	0.276	7.51885e-06
T-cell like	Rpl10	0.535206	0.134292	0.881	0.786	8.93793e-06
T-cell like	N4bp2l2	0.832114	0.166304	0.548	0.292	1.10685e-05
T-cell like	Psme1	0.721929	0.203827	0.548	0.28	1.35659e-05
T-cell like	Hnrnpf	0.746485	0.271953	0.524	0.282	1.81001e-05
T-cell like	Rps26-ps1	0.575015	0.337769	0.762	0.564	2.24805e-05
T-cell like	Rpl7a	0.503662	0.519593	0.833	0.623	3.45819e-05
T-cell like	Rps12-ps3	0.685101	0.545953	0.69	0.539	3.63363e-05
T-cell like	Rpl35	0.556056	0.548058	0.738	0.562	3.64764e-05
T-cell like	Eef1b2	0.657698	0.67289	0.667	0.484	4.47847e-05
T-cell like	Sema4d	0.718174	0.739657	0.262	0.08	4.92284e-05
T-cell like	Gm8186	0.705411	0.757504	0.5	0.263	5.04162e-05
T-cell like	Bcl2a1b	0.674076	0.791434	0.286	0.088	5.26745e-05
T-cell like	Gltscr2	0.802974	0.819105	0.476	0.241	5.45161e-05
T-cell like	Tomm70a	0.572301	0.852222	0.262	0.08	5.67202e-05
T-cell like	Itpkb	0.67703	0.864588	0.357	0.144	5.75433e-05
T-cell like	Arhgef1	0.817108	0.893903	0.405	0.187	5.94944e-05
T-cell like	Clic1	0.731341	1	0.5	0.278	7.68902e-05
T-cell like	Bola2	0.619096	1	0.548	0.34	9.13347e-05
T-cell like	Eif3f	0.614145	1	0.643	0.416	0.000100826
T-cell like	Gm10036	0.625195	1	0.571	0.358	0.000105698
T-cell like	Rpl36al	0.573763	1	0.738	0.628	0.000108937
T-cell like	Npm3	0.702735	1	0.286	0.103	0.000110336
T-cell like	Rpl22l1	0.352932	1	0.952	0.757	0.000113394
T-cell like	Capza1	0.756991	1	0.333	0.132	0.000116944
T-cell like	Krtcap2	0.581962	1	0.571	0.356	0.000123471
T-cell like	Prr13	0.673891	1	0.452	0.239	0.000157006
T-cell like	Cdk2ap2	0.576056	1	0.381	0.165	0.000161298
T-cell like	Eef2	0.541671	1	0.738	0.714	0.000186639
T-cell like	Cd84	0.484615	1	0.262	0.082	0.000192976
T-cell like	Arpc1b	0.625121	1	0.5	0.257	0.000201857
T-cell like	Gm6133	0.614899	1	0.333	0.134	0.000219125
T-cell like	Eef1g	0.664813	1	0.69	0.562	0.000225479
T-cell like	Gm10260	0.712029	1	0.333	0.144	0.000265544
T-cell like	Zfp36l2	0.967868	1	0.405	0.206	0.000347313
T-cell like	Stat1	1.01959	1	0.357	0.16	0.000374424
T-cell like	Cox5a	0.84097	1	0.476	0.315	0.000387133
T-cell like	Rpl10-ps3	0.705765	1	0.524	0.325	0.000446685
T-cell like	Atp5c1	0.717147	1	0.5	0.315	0.000585724
T-cell like	Mitd1	0.628184	1	0.286	0.117	0.000620526
T-cell like	Serbp1	0.705651	1	0.571	0.434	0.00063567
T-cell like	Elf1	0.481894	1	0.262	0.097	0.000742819
T-cell like	Ly6e	0.314493	1	0.833	0.611	0.00074412
T-cell like	Fkbp3	0.623077	1	0.405	0.226	0.000747407
T-cell like	Tma7	0.57105	1	0.69	0.578	0.000822321
T-cell like	Arpc2	0.647868	1	0.524	0.333	0.00087919
T-cell like	Rwdd1	0.678246	1	0.381	0.195	0.000887388
T-cell like	Pcna	0.640158	1	0.286	0.119	0.000950736
T-cell like	Ppp1cc	0.638375	1	0.286	0.121	0.00101483
T-cell like	Eif1	0.394807	1	0.81	0.805	0.00129671
T-cell like	Ldha	0.633626	1	0.429	0.259	0.00154074
T-cell like	Itgb1	0.632479	1	0.405	0.224	0.00176666
T-cell like	Slc25a5	0.679068	1	0.452	0.288	0.00184858
T-cell like	Capzb	0.632522	1	0.452	0.28	0.00193658
T-cell like	Myl12b	0.658455	1	0.429	0.239	0.00195938
T-cell like	Psmb1	0.648033	1	0.476	0.319	0.00198409
T-cell like	Arpc5	0.597251	1	0.357	0.189	0.00199889
T-cell like	Gm10263	0.592536	1	0.714	0.652	0.00200888
T-cell like	Cox7a2l	0.529999	1	0.643	0.475	0.00240167
T-cell like	Ptma	0.665714	1	0.81	0.765	0.00248407
T-cell like	H2afj	0.6887	1	0.452	0.294	0.0025118
T-cell like	Sms	0.648887	1	0.262	0.117	0.0025479
T-cell like	Peli1	0.526936	1	0.286	0.128	0.00266272
T-cell like	Gm26917	0.620294	1	0.286	0.132	0.00290068
T-cell like	Eif3h	0.724953	1	0.476	0.35	0.00305303
T-cell like	Ccnd2	0.499468	1	0.714	0.545	0.00312053
T-cell like	Jak1	0.684222	1	0.357	0.187	0.00315078
T-cell like	Ostf1	0.497371	1	0.286	0.128	0.00324052
T-cell like	Pycard	0.545631	1	0.262	0.115	0.00391644
T-cell like	Cap1	0.449432	1	0.286	0.13	0.00410669
T-cell like	Tubb5	1.09877	1	0.5	0.37	0.00416346
T-cell like	Dock10	0.550207	1	0.31	0.158	0.00437303
T-cell like	Txn1	0.599209	1	0.5	0.356	0.00546707
T-cell like	Naca	0.414969	1	0.667	0.588	0.00589625
T-cell like	Ube2d3	0.346782	1	0.643	0.502	0.00630702
T-cell like	Tspo	0.616041	1	0.381	0.23	0.00692014
T-cell like	Churc1	0.540766	1	0.429	0.29	0.00718513
T-cell like	Snrpf	0.492219	1	0.548	0.44	0.0072787
T-cell like	Myl12a	0.573975	1	0.452	0.311	0.00728217
T-cell like	Vgll4	0.603045	1	0.262	0.13	0.00826837
T-cell like	Taf6l	0.779591	1	0.262	0.138	0.0084868
T-cell like	Slbp	0.417353	1	0.262	0.128	0.00988338
epithelial-like cells	Lcn2	2.867	3.31711e-79	0.913	0.012	2.20773e-83
epithelial-like cells	Cyp2f2	2.62571	1.91079e-77	0.87	0.01	1.27174e-81
epithelial-like cells	Folr1	1.45169	1.09312e-46	0.478	0.002	7.27537e-51
epithelial-like cells	Krt18	1.78025	1.73579e-45	0.783	0.03	1.15527e-49
epithelial-like cells	Rbpms	1.63347	1.0897e-42	0.565	0.01	7.25255e-47
epithelial-like cells	Ednrb	1.8871	4.83826e-41	0.652	0.02	3.22014e-45
epithelial-like cells	Plat	1.75325	7.18695e-38	0.696	0.028	4.78333e-42
epithelial-like cells	Hey2	0.623021	1.7476e-31	0.304	0	1.16313e-35
epithelial-like cells	Tm4sf1	1.62665	1.2665e-30	0.696	0.04	8.42929e-35
epithelial-like cells	Rfx4	0.808777	6.33029e-27	0.304	0.002	4.21317e-31
epithelial-like cells	Gm15698	1.42892	1.42316e-26	0.261	0	9.47193e-31
epithelial-like cells	Alox12e	0.893426	1.42316e-26	0.261	0	9.47193e-31
epithelial-like cells	Ces1d	1.09046	1.17599e-25	0.478	0.018	7.8269e-30
epithelial-like cells	Gstm2	0.830527	4.66765e-25	0.348	0.006	3.10659e-29
epithelial-like cells	Krt8	1.67146	6.97814e-25	0.565	0.032	4.64435e-29
epithelial-like cells	Cldn7	1.18831	4.36425e-24	0.478	0.02	2.90466e-28
epithelial-like cells	Ahnak	1.29856	5.99939e-24	0.783	0.071	3.99294e-28
epithelial-like cells	Cryab	1.44142	7.78178e-24	0.565	0.032	5.17922e-28
epithelial-like cells	Bcam	0.958071	1.2759e-22	0.391	0.012	8.49182e-27
epithelial-like cells	Krt17	0.936051	3.75218e-22	0.261	0.002	2.49729e-26
epithelial-like cells	Slc16a11	1.24778	6.69157e-21	0.391	0.014	4.45362e-25
epithelial-like cells	Pax6	1.22128	1.18402e-20	0.565	0.04	7.8803e-25
epithelial-like cells	Thsd4	1.12134	1.55065e-20	0.304	0.006	1.03205e-24
epithelial-like cells	Ltbp4	1.16974	1.76955e-19	0.478	0.028	1.17773e-23
epithelial-like cells	Tmem30b	1.53509	6.12261e-19	0.609	0.053	4.07495e-23
epithelial-like cells	2200002D01Rik	0.574362	1.01844e-18	0.261	0.004	6.77833e-23
epithelial-like cells	Calml4	0.630624	1.0876e-18	0.261	0.004	7.23862e-23
epithelial-like cells	Aqp4	0.655031	1.16141e-18	0.261	0.004	7.72984e-23
epithelial-like cells	Maob	0.836871	3.66859e-18	0.304	0.008	2.44166e-22
epithelial-like cells	Plce1	0.673084	6.37934e-18	0.304	0.008	4.24581e-22
epithelial-like cells	Fam107a	1.19561	7.72927e-18	0.522	0.038	5.14427e-22
epithelial-like cells	Mia	2.49423	2.15533e-17	0.957	0.234	1.4345e-21
epithelial-like cells	Emp1	0.901076	1.17559e-16	0.348	0.014	7.82426e-21
epithelial-like cells	Cpxm2	1.13936	1.37374e-16	0.435	0.026	9.14301e-21
epithelial-like cells	Il17re	0.97357	2.21483e-16	0.304	0.01	1.4741e-20
epithelial-like cells	Degs2	0.888706	3.18708e-16	0.261	0.006	2.12118e-20
epithelial-like cells	Gstm1	2.14161	3.69087e-15	0.957	0.251	2.45648e-19
epithelial-like cells	Lamc2	0.813807	1.08865e-14	0.304	0.012	7.2456e-19
epithelial-like cells	Kcnk1	0.86378	2.30214e-14	0.435	0.032	1.5322e-18
epithelial-like cells	Hey1	0.889874	2.58279e-14	0.348	0.018	1.719e-18
epithelial-like cells	Pla2g7	1.36879	5.14341e-14	0.652	0.085	3.42323e-18
epithelial-like cells	Rhou	1.03392	1.60231e-13	0.478	0.042	1.06643e-17
epithelial-like cells	Por	1.42814	9.88713e-13	0.609	0.079	6.58046e-17
epithelial-like cells	Slc15a2	1.07307	1.60047e-12	0.478	0.046	1.06521e-16
epithelial-like cells	Bdh2	0.737011	1.93577e-12	0.391	0.028	1.28837e-16
epithelial-like cells	Epcam	1.43826	2.45714e-12	0.783	0.143	1.63537e-16
epithelial-like cells	Aldh1a1	0.633965	3.90262e-12	0.261	0.01	2.59742e-16
epithelial-like cells	Slit2	0.561101	3.90262e-12	0.261	0.01	2.59742e-16
epithelial-like cells	S100a6	1.39997	1.56402e-11	0.652	0.093	1.04094e-15
epithelial-like cells	Tmod1	0.962516	6.07521e-11	0.391	0.034	4.0434e-15
epithelial-like cells	Ttll3	0.563524	8.30547e-11	0.261	0.012	5.52777e-15
epithelial-like cells	Dsp	0.535401	1.09654e-10	0.304	0.018	7.29807e-15
epithelial-like cells	Ceacam1	0.470025	1.22131e-10	0.261	0.012	8.12852e-15
epithelial-like cells	Lbp	0.72288	1.22586e-10	0.304	0.018	8.15883e-15
epithelial-like cells	Cldn3	1.58954	2.36258e-10	0.522	0.069	1.57243e-14
epithelial-like cells	Pitx2	1.07711	6.53603e-10	0.478	0.059	4.3501e-14
epithelial-like cells	Calcrl	0.817953	1.46094e-09	0.261	0.014	9.72341e-14
epithelial-like cells	Cxadr	0.975064	1.48852e-09	0.391	0.038	9.90697e-14
epithelial-like cells	S100a10	1.24454	1.7359e-09	0.652	0.113	1.15534e-13
epithelial-like cells	Six6	1.35654	2.44405e-09	0.652	0.123	1.62665e-13
epithelial-like cells	Gclc	1.28509	2.80708e-09	0.522	0.075	1.86827e-13
epithelial-like cells	Prkcdbp	0.725342	3.37626e-09	0.435	0.048	2.24709e-13
epithelial-like cells	Plekhb1	0.886834	4.74074e-09	0.522	0.071	3.15523e-13
epithelial-like cells	Clu	1.59909	5.12024e-09	0.826	0.236	3.40782e-13
epithelial-like cells	Ifitm3	1.50915	5.46096e-09	0.957	0.352	3.63458e-13
epithelial-like cells	Hddc2	0.807454	9.5703e-09	0.391	0.04	6.36958e-13
epithelial-like cells	Mgst1	1.3996	2.58433e-08	0.696	0.156	1.72002e-12
epithelial-like cells	Ly6a	1.44945	2.9599e-08	0.565	0.091	1.96998e-12
epithelial-like cells	Sfrp5	0.984067	3.16424e-08	0.478	0.063	2.10598e-12
epithelial-like cells	Col1a2	0.512543	4.57553e-08	0.348	0.032	3.04528e-12
epithelial-like cells	Cd59a	0.949636	6.33077e-08	0.522	0.083	4.21349e-12
epithelial-like cells	Rbp1	1.10464	6.49367e-08	0.565	0.093	4.32191e-12
epithelial-like cells	Atp1b1	1.68137	6.94338e-08	0.739	0.208	4.62122e-12
epithelial-like cells	Csrp2	0.735775	7.29141e-08	0.261	0.018	4.85285e-12
epithelial-like cells	Nedd4l	0.715243	1.07162e-07	0.391	0.044	7.13222e-12
epithelial-like cells	S100a11	1.19621	1.403e-07	0.783	0.208	9.33776e-12
epithelial-like cells	Cldn9	0.787965	2.66027e-07	0.304	0.028	1.77056e-11
epithelial-like cells	Lgals3	0.774709	2.75695e-07	0.348	0.036	1.83491e-11
epithelial-like cells	Irf6	0.742575	9.04648e-07	0.304	0.03	6.02095e-11
epithelial-like cells	Aldoc	1.36599	9.96853e-07	0.826	0.257	6.63463e-11
epithelial-like cells	Anxa2	1.27214	1.0576e-06	0.783	0.244	7.03892e-11
epithelial-like cells	App	1.26469	1.10228e-06	0.913	0.354	7.33628e-11
epithelial-like cells	Ext1	0.781268	1.5388e-06	0.478	0.075	1.02416e-10
epithelial-like cells	Ptrf	0.838025	1.72162e-06	0.304	0.03	1.14584e-10
epithelial-like cells	Pbxip1	1.53348	2.083e-06	0.783	0.275	1.38636e-10
epithelial-like cells	Klf10	0.613692	2.81214e-06	0.348	0.04	1.87164e-10
epithelial-like cells	Sorl1	0.532393	3.51202e-06	0.304	0.03	2.33745e-10
epithelial-like cells	Kcnk2	0.571795	5.47689e-06	0.348	0.042	3.64519e-10
epithelial-like cells	Prpf18	0.658898	5.52684e-06	0.435	0.065	3.67843e-10
epithelial-like cells	Ccdc80	0.751643	5.99752e-06	0.348	0.042	3.9917e-10
epithelial-like cells	Ly6e	1.23451	7.19904e-06	0.957	0.614	4.79137e-10
epithelial-like cells	Ece1	1.24518	1.00094e-05	0.609	0.145	6.66183e-10
epithelial-like cells	Sod3	0.601748	1.01061e-05	0.304	0.032	6.7262e-10
epithelial-like cells	Ly6h	1.1558	1.07547e-05	0.783	0.251	7.15787e-10
epithelial-like cells	Hspb1	1.19817	1.11965e-05	0.783	0.246	7.45188e-10
epithelial-like cells	Hmgcs2	0.739303	1.19894e-05	0.391	0.055	7.97964e-10
epithelial-like cells	Mmp15	0.865848	1.38268e-05	0.348	0.046	9.20251e-10
epithelial-like cells	Ildr1	0.654461	1.99827e-05	0.304	0.034	1.32996e-09
epithelial-like cells	Fam101b	0.921475	2.47472e-05	0.391	0.057	1.64707e-09
epithelial-like cells	Mt2	1.4194	2.63079e-05	0.957	0.451	1.75094e-09
epithelial-like cells	Sdc4	1.1246	2.64967e-05	0.739	0.236	1.76351e-09
epithelial-like cells	Phgdh	1.01732	2.73807e-05	0.348	0.046	1.82234e-09
epithelial-like cells	Tmem176b	1.24899	3.0087e-05	0.913	0.448	2.00246e-09
epithelial-like cells	Zfp36l1	0.934892	3.41612e-05	0.696	0.176	2.27362e-09
epithelial-like cells	Tns2	0.705566	3.65483e-05	0.304	0.036	2.4325e-09
epithelial-like cells	Nacc2	0.850177	3.73413e-05	0.478	0.093	2.48528e-09
epithelial-like cells	Aox1	0.74147	3.91874e-05	0.304	0.036	2.60814e-09
epithelial-like cells	Tpm1	1.19548	4.02085e-05	0.609	0.162	2.67611e-09
epithelial-like cells	Gsta4	0.920871	4.62124e-05	0.435	0.077	3.0757e-09
epithelial-like cells	Wfdc2	0.517744	6.26814e-05	0.261	0.026	4.17181e-09
epithelial-like cells	F2r	0.517548	7.92581e-05	0.261	0.026	5.27508e-09
epithelial-like cells	Cd24a	0.81374	0.000106349	0.609	0.152	7.07812e-09
epithelial-like cells	Six1	1.15604	0.000113831	0.435	0.083	7.57609e-09
epithelial-like cells	Fam129a	0.878723	0.000128531	0.261	0.028	8.55448e-09
epithelial-like cells	Skp1a	0.951595	0.000188698	0.957	0.473	1.25589e-08
epithelial-like cells	Ssx2ip	0.702262	0.000191396	0.304	0.04	1.27385e-08
epithelial-like cells	Paqr7	0.395498	0.000257227	0.261	0.028	1.71199e-08
epithelial-like cells	Kcnb2	0.614073	0.000258067	0.304	0.04	1.71758e-08
epithelial-like cells	Ndrg1	0.447268	0.000276853	0.261	0.028	1.84261e-08
epithelial-like cells	Mme	0.385029	0.000290736	0.261	0.028	1.93502e-08
epithelial-like cells	Tmem246	0.570485	0.000299374	0.304	0.04	1.99251e-08
epithelial-like cells	Dkk3	0.603743	0.000313658	0.391	0.063	2.08758e-08
epithelial-like cells	Dstn	0.978849	0.000318094	0.913	0.455	2.1171e-08
epithelial-like cells	St6gal1	0.702419	0.000478611	0.261	0.03	3.18543e-08
epithelial-like cells	Txnip	0.942979	0.000533019	0.739	0.246	3.54755e-08
epithelial-like cells	Tnfaip2	0.512554	0.000610198	0.304	0.04	4.06121e-08
epithelial-like cells	Sypl	0.827151	0.000675236	0.522	0.117	4.49408e-08
epithelial-like cells	Spint2	1.31872	0.00068848	0.696	0.265	4.58223e-08
epithelial-like cells	Alad	0.845086	0.000723668	0.304	0.044	4.81643e-08
epithelial-like cells	Stx18	0.737464	0.000738228	0.304	0.044	4.91333e-08
epithelial-like cells	Rab25	0.617195	0.000946545	0.348	0.055	6.2998e-08
epithelial-like cells	Cnn3	1.02529	0.00103931	0.652	0.222	6.91718e-08
epithelial-like cells	Pde6d	0.695579	0.00107573	0.478	0.101	7.1596e-08
epithelial-like cells	Tmem29	0.516107	0.00130334	0.348	0.055	8.67449e-08
epithelial-like cells	Laptm4a	0.983889	0.00146714	0.913	0.523	9.76464e-08
epithelial-like cells	Atp1a1	0.922497	0.00167925	0.913	0.36	1.11763e-07
epithelial-like cells	Slc9a3r1	0.934525	0.00178684	0.435	0.093	1.18925e-07
epithelial-like cells	Atp2b4	0.732197	0.00190562	0.435	0.091	1.2683e-07
epithelial-like cells	Mt1	0.907412	0.00193572	1	0.715	1.28834e-07
epithelial-like cells	Ptma	0.833697	0.00202133	0.957	0.76	1.34531e-07
epithelial-like cells	Prss36	0.668102	0.00203383	0.261	0.034	1.35363e-07
epithelial-like cells	Acsl3	0.678883	0.0022341	0.391	0.073	1.48692e-07
epithelial-like cells	Tagln2	0.955628	0.00245346	0.435	0.087	1.63292e-07
epithelial-like cells	Cp	0.958687	0.0040175	0.304	0.048	2.67387e-07
epithelial-like cells	Glul	0.910591	0.00423067	0.652	0.214	2.81575e-07
epithelial-like cells	Rragd	0.38915	0.00424986	0.304	0.046	2.82853e-07
epithelial-like cells	Slc1a4	0.633578	0.00516726	0.261	0.036	3.43911e-07
epithelial-like cells	Tlk1	0.577623	0.00518281	0.304	0.048	3.44946e-07
epithelial-like cells	Oasl2	0.956791	0.00521414	0.435	0.101	3.47031e-07
epithelial-like cells	Sgms1	0.713343	0.00548881	0.609	0.172	3.65312e-07
epithelial-like cells	Ezr	0.714414	0.00571028	0.478	0.115	3.80052e-07
epithelial-like cells	Arap2	0.503132	0.0063211	0.304	0.048	4.20706e-07
epithelial-like cells	Acadm	0.941133	0.00728904	0.391	0.083	4.85128e-07
epithelial-like cells	Spint1	1.05754	0.0078796	0.348	0.067	5.24432e-07
epithelial-like cells	Ddah2	0.846198	0.00797293	0.304	0.05	5.30645e-07
epithelial-like cells	S100a16	0.966545	0.00813289	0.565	0.152	5.41291e-07
epithelial-like cells	Serpinb6a	0.782972	0.00894481	0.478	0.117	5.95328e-07
epithelial-like cells	Klf4	0.628333	0.0125445	0.304	0.05	8.34908e-07
epithelial-like cells	Cgn	0.904107	0.013889	0.261	0.04	9.2439e-07
epithelial-like cells	Yap1	0.600096	0.0139367	0.261	0.038	9.27565e-07
epithelial-like cells	Cntn1	1.03012	0.0143269	0.348	0.067	9.53535e-07
epithelial-like cells	Agrn	0.820924	0.0155856	0.304	0.053	1.03731e-06
epithelial-like cells	Mfge8	0.775408	0.015689	0.348	0.067	1.04419e-06
epithelial-like cells	Slain1	0.77075	0.0184404	0.261	0.04	1.22731e-06
epithelial-like cells	Ndrg2	0.642566	0.019484	0.435	0.099	1.29677e-06
epithelial-like cells	Myl12a	0.920294	0.0214632	0.739	0.303	1.4285e-06
epithelial-like cells	Ptprg	0.315407	0.0225104	0.261	0.038	1.4982e-06
epithelial-like cells	Clstn1	0.787883	0.0225291	0.696	0.251	1.49944e-06
epithelial-like cells	Dbi	0.799312	0.0256006	0.913	0.487	1.70386e-06
epithelial-like cells	Scpep1	0.948802	0.027304	0.348	0.075	1.81724e-06
epithelial-like cells	Pqlc1	0.482028	0.0277936	0.261	0.04	1.84982e-06
epithelial-like cells	Chchd10	0.866888	0.0285568	0.739	0.303	1.90062e-06
epithelial-like cells	Flna	0.866046	0.0301308	0.435	0.109	2.00538e-06
epithelial-like cells	Msx1	0.7882	0.0366575	0.391	0.091	2.43977e-06
epithelial-like cells	Gbas	0.547212	0.0397377	0.348	0.069	2.64477e-06
epithelial-like cells	Ccdc63	0.334389	0.0401308	0.261	0.04	2.67094e-06
epithelial-like cells	Igfbp5	1.09342	0.0407434	0.913	0.412	2.71171e-06
epithelial-like cells	Aplp2	1.00146	0.0408206	0.652	0.269	2.71685e-06
epithelial-like cells	Mettl7a1	0.772732	0.0438352	0.522	0.147	2.91748e-06
epithelial-like cells	Ets2	0.654491	0.045314	0.304	0.055	3.01591e-06
epithelial-like cells	Trove2	0.456194	0.048011	0.435	0.101	3.19541e-06
epithelial-like cells	Pttg1ip	0.695933	0.0543373	0.391	0.089	3.61646e-06
epithelial-like cells	Fam213a	0.650851	0.0552742	0.391	0.091	3.67882e-06
epithelial-like cells	Rhoc	0.97096	0.058909	0.565	0.182	3.92073e-06
epithelial-like cells	Shroom3	0.379798	0.0819194	0.304	0.055	5.45221e-06
epithelial-like cells	Cd9	1.12953	0.0858415	0.739	0.354	5.71325e-06
epithelial-like cells	Vegfb	0.334296	0.0906293	0.261	0.042	6.0319e-06
epithelial-like cells	Cd151	0.719666	0.0948958	0.348	0.077	6.31586e-06
epithelial-like cells	Gas6	0.720138	0.0951602	0.478	0.133	6.33345e-06
epithelial-like cells	Stxbp6	0.62384	0.0961796	0.304	0.059	6.4013e-06
epithelial-like cells	Timp3	0.770686	0.0994008	0.826	0.317	6.61569e-06
epithelial-like cells	S100a1	0.80033	0.105257	0.609	0.214	7.00546e-06
epithelial-like cells	Krcc1	0.592046	0.108419	0.565	0.182	7.21588e-06
epithelial-like cells	Zfp608	0.685001	0.111325	0.348	0.077	7.40929e-06
epithelial-like cells	Ift81	0.500947	0.111602	0.261	0.046	7.42778e-06
epithelial-like cells	Ccdc125	0.813346	0.117651	0.478	0.141	7.83038e-06
epithelial-like cells	Fbxo32	0.463398	0.122798	0.261	0.044	8.17291e-06
epithelial-like cells	Fkbp9	0.528656	0.140132	0.391	0.093	9.32658e-06
epithelial-like cells	Spry1	0.602367	0.157247	0.304	0.061	1.04657e-05
epithelial-like cells	Frmd4b	0.522104	0.157925	0.391	0.089	1.05108e-05
epithelial-like cells	Runx1	0.621991	0.168222	0.304	0.059	1.11962e-05
epithelial-like cells	Smim22	0.627551	0.1847	0.391	0.101	1.22929e-05
epithelial-like cells	Ywhaq	0.675717	0.190835	0.783	0.382	1.27011e-05
epithelial-like cells	Prdx1	0.995137	0.19527	0.913	0.608	1.29964e-05
epithelial-like cells	Slc3a2	0.81162	0.201682	0.565	0.192	1.34231e-05
epithelial-like cells	Npc1	0.829429	0.209274	0.348	0.081	1.39284e-05
epithelial-like cells	Arrb1	0.37136	0.214602	0.261	0.046	1.4283e-05
epithelial-like cells	Dab2	0.586137	0.21535	0.304	0.061	1.43328e-05
epithelial-like cells	Nfix	0.86671	0.221985	0.739	0.358	1.47743e-05
epithelial-like cells	Nfia	0.768732	0.222462	0.87	0.586	1.48061e-05
epithelial-like cells	Calu	0.482446	0.231122	0.348	0.077	1.53825e-05
epithelial-like cells	Cep170b	0.530445	0.231126	0.391	0.099	1.53827e-05
epithelial-like cells	Exoc8	0.720073	0.268558	0.435	0.125	1.78741e-05
epithelial-like cells	Ar	0.732906	0.27494	0.391	0.105	1.82988e-05
epithelial-like cells	Zfp703	0.55434	0.279916	0.304	0.063	1.863e-05
epithelial-like cells	Alg2	0.471158	0.282891	0.348	0.081	1.8828e-05
epithelial-like cells	Ctdspl	0.496501	0.309283	0.261	0.048	2.05846e-05
epithelial-like cells	Prelid1	0.475295	0.367035	0.435	0.115	2.44283e-05
epithelial-like cells	Ptp4a1	0.767653	0.387632	0.478	0.162	2.57992e-05
epithelial-like cells	Wfs1	0.572681	0.391333	0.261	0.051	2.60455e-05
epithelial-like cells	Tcf7l2	0.691316	0.397051	0.435	0.121	2.6426e-05
epithelial-like cells	Nedd4	0.67768	0.440609	0.739	0.352	2.9325e-05
epithelial-like cells	Gpc6	0.457093	0.445911	0.304	0.063	2.96779e-05
epithelial-like cells	Fam3c	0.721146	0.457693	0.435	0.131	3.04621e-05
epithelial-like cells	Nrbp2	0.787314	0.498602	0.348	0.087	3.31848e-05
epithelial-like cells	Crip2	0.753546	0.504914	0.522	0.176	3.36049e-05
epithelial-like cells	Bmpr2	0.651856	0.520777	0.478	0.15	3.46607e-05
epithelial-like cells	Notch1	0.439509	0.521633	0.261	0.05	3.47177e-05
epithelial-like cells	Gtf2i	0.540132	0.542259	0.609	0.222	3.60905e-05
epithelial-like cells	Hmgn1	0.673354	0.549163	0.783	0.38	3.65499e-05
epithelial-like cells	Suclg2	0.511678	0.565411	0.391	0.103	3.76314e-05
epithelial-like cells	Ccni	0.551331	0.577838	0.652	0.244	3.84585e-05
epithelial-like cells	Cxcl16	0.411959	0.578776	0.391	0.099	3.85209e-05
epithelial-like cells	St5	0.590457	0.592104	0.261	0.051	3.94079e-05
epithelial-like cells	Ift43	0.691418	0.674585	0.304	0.067	4.48975e-05
epithelial-like cells	Rhoq	0.368997	0.698622	0.304	0.065	4.64973e-05
epithelial-like cells	Cdkn1b	0.541816	0.823764	0.522	0.17	5.48262e-05
epithelial-like cells	Ephx1	0.511772	0.86058	0.261	0.053	5.72765e-05
epithelial-like cells	Plpp3	0.471809	0.872291	0.435	0.133	5.8056e-05
epithelial-like cells	Syne2	0.564488	0.970455	0.304	0.071	6.45894e-05
epithelial-like cells	Ifitm2	0.711967	1	0.652	0.291	6.98045e-05
epithelial-like cells	Phpt1	0.615234	1	0.609	0.251	7.39988e-05
epithelial-like cells	Ctnna1	0.621476	1	0.522	0.182	7.62906e-05
epithelial-like cells	H3f3b	0.556805	1	0.957	0.76	8.28624e-05
epithelial-like cells	Nnat	2.15171	1	0.348	0.103	8.41351e-05
epithelial-like cells	Ctnnd1	0.452783	1	0.304	0.071	8.5792e-05
epithelial-like cells	Tsc22d3	0.55985	1	0.435	0.129	8.82865e-05
epithelial-like cells	Clip4	0.338434	1	0.304	0.069	9.20413e-05
epithelial-like cells	Kat6a	0.28364	1	0.304	0.069	0.000101557
epithelial-like cells	Hadh	0.557569	1	0.304	0.073	0.000104167
epithelial-like cells	Gprc5b	0.383379	1	0.348	0.089	0.000104192
epithelial-like cells	Selm	0.651217	1	0.739	0.352	0.000109083
epithelial-like cells	Zfp664	0.380722	1	0.391	0.109	0.000109705
epithelial-like cells	Fbxo22	0.486602	1	0.261	0.055	0.000114347
epithelial-like cells	Ablim1	0.892501	1	0.304	0.075	0.000121076
epithelial-like cells	Aktip	0.470404	1	0.304	0.075	0.000126902
epithelial-like cells	Fuz	0.640663	1	0.261	0.059	0.000136691
epithelial-like cells	Dctn6	0.834078	1	0.391	0.127	0.00013888
epithelial-like cells	Cstb	0.597836	1	0.609	0.261	0.000141422
epithelial-like cells	Apmap	0.337872	1	0.261	0.055	0.000141584
epithelial-like cells	Aldh2	0.80987	1	0.565	0.224	0.000145104
epithelial-like cells	Plin3	0.342549	1	0.261	0.055	0.000147328
epithelial-like cells	Hes1	0.584298	1	0.609	0.238	0.00018469
epithelial-like cells	Ankrd40	0.28939	1	0.304	0.073	0.000187793
epithelial-like cells	Lsm1	0.38243	1	0.304	0.075	0.000192619
epithelial-like cells	Eif1ax	0.510473	1	0.435	0.139	0.000194928
epithelial-like cells	Rasal2	0.44744	1	0.261	0.057	0.000196501
epithelial-like cells	Sh3gl2	0.429569	1	0.261	0.059	0.000198179
epithelial-like cells	Pygb	0.395343	1	0.391	0.115	0.000199879
epithelial-like cells	Dclk1	0.535354	1	0.435	0.145	0.000201586
epithelial-like cells	Spin1	0.518195	1	0.348	0.099	0.000204299
epithelial-like cells	2810004N23Rik	0.605511	1	0.478	0.16	0.00020521
epithelial-like cells	Arxes2	0.496084	1	0.391	0.117	0.000205486
epithelial-like cells	Tpm4	0.529013	1	0.435	0.139	0.000210178
epithelial-like cells	Marcksl1	0.861571	1	0.522	0.222	0.000211843
epithelial-like cells	Ppfibp1	0.63067	1	0.261	0.061	0.000220079
epithelial-like cells	Fam177a	0.605429	1	0.391	0.123	0.000224565
epithelial-like cells	Fnbp1l	0.468362	1	0.304	0.079	0.000227314
epithelial-like cells	Erlin2	0.422017	1	0.304	0.077	0.000233307
epithelial-like cells	Babam1	0.552158	1	0.261	0.061	0.000240027
epithelial-like cells	Hnrnpa0	0.579165	1	0.522	0.208	0.000251557
epithelial-like cells	Sall2	0.597975	1	0.391	0.125	0.000267073
epithelial-like cells	Ak3	0.654441	1	0.261	0.061	0.000268172
epithelial-like cells	Mapre2	0.478561	1	0.348	0.099	0.000270995
epithelial-like cells	Tuba1a	0.778626	1	0.652	0.331	0.000272573
epithelial-like cells	Pla2g16	0.418058	1	0.348	0.097	0.000278267
epithelial-like cells	Zc2hc1a	0.603852	1	0.304	0.083	0.000281817
epithelial-like cells	Mvb12a	0.296102	1	0.304	0.077	0.000288251
epithelial-like cells	Katnbl1	0.429897	1	0.261	0.061	0.00029217
epithelial-like cells	Amotl1	0.656352	1	0.478	0.182	0.000294157
epithelial-like cells	Mfsd7b	0.286484	1	0.261	0.059	0.000322417
epithelial-like cells	Cald1	0.423301	1	0.435	0.145	0.000323529
epithelial-like cells	Lig1	0.275358	1	0.261	0.059	0.000334512
epithelial-like cells	Pcdh17	0.840976	1	0.391	0.135	0.000345037
epithelial-like cells	Cpd	0.441087	1	0.348	0.099	0.000364797
epithelial-like cells	Ctdsp1	0.348437	1	0.304	0.081	0.000380252
epithelial-like cells	Spry2	0.38413	1	0.435	0.143	0.000380894
epithelial-like cells	Dazap2	0.453871	1	0.522	0.194	0.000389861
epithelial-like cells	Lats1	0.427422	1	0.261	0.063	0.000402186
epithelial-like cells	Eif4h	0.416914	1	0.522	0.192	0.000405063
epithelial-like cells	0610009L18Rik	0.467561	1	0.261	0.065	0.000412719
epithelial-like cells	Socs2	0.971377	1	0.522	0.208	0.000415667
epithelial-like cells	Atad1	0.507802	1	0.435	0.149	0.000433619
epithelial-like cells	Hspa4l	0.486919	1	0.435	0.15	0.000438379
epithelial-like cells	Epb41l4b	0.258791	1	0.261	0.061	0.000445388
epithelial-like cells	Emb	0.45854	1	0.478	0.172	0.000452336
epithelial-like cells	Nap1l4	0.3421	1	0.348	0.103	0.000463238
epithelial-like cells	Apln	0.632352	1	0.261	0.067	0.000468078
epithelial-like cells	Psen2	0.548202	1	0.391	0.127	0.000489512
epithelial-like cells	Epdr1	0.56593	1	0.261	0.067	0.000501203
epithelial-like cells	Gabarapl1	0.694722	1	0.652	0.339	0.0005266
epithelial-like cells	Ube2m	0.273871	1	0.261	0.063	0.000564356
epithelial-like cells	Tshz1	0.534908	1	0.391	0.139	0.000574245
epithelial-like cells	Lpgat1	0.43368	1	0.261	0.065	0.000576491
epithelial-like cells	Pofut2	0.417601	1	0.435	0.15	0.000601226
epithelial-like cells	Rbbp7	0.738093	1	0.391	0.143	0.00061914
epithelial-like cells	Ppp6r3	0.334332	1	0.261	0.065	0.000624218
epithelial-like cells	Golga7	0.300719	1	0.304	0.083	0.000657821
epithelial-like cells	Tsc22d1	0.589369	1	0.609	0.315	0.000670921
epithelial-like cells	H2-K1	0.648466	1	0.826	0.515	0.000680418
epithelial-like cells	Klf13	0.627203	1	0.435	0.17	0.000687799
epithelial-like cells	Ddit3	0.779535	1	0.304	0.091	0.000705331
epithelial-like cells	Nab1	0.734165	1	0.261	0.069	0.000727468
epithelial-like cells	Mpst	0.309304	1	0.261	0.065	0.000730891
epithelial-like cells	Anxa5	0.628085	1	0.652	0.311	0.000734254
epithelial-like cells	Ralgapa2	0.582021	1	0.261	0.069	0.000735478
epithelial-like cells	Reep5	0.768814	1	0.565	0.279	0.000737939
epithelial-like cells	Actg1	0.630136	1	0.913	0.709	0.00076213
epithelial-like cells	Nr2f2	0.427409	1	0.261	0.069	0.000768343
epithelial-like cells	Rbm17	0.252231	1	0.304	0.083	0.000773356
epithelial-like cells	Amd1	0.317071	1	0.565	0.22	0.000781372
epithelial-like cells	Mdk	0.682419	1	0.522	0.212	0.000784345
epithelial-like cells	Fubp3	0.442586	1	0.261	0.067	0.000793006
epithelial-like cells	Cryzl1	0.498188	1	0.348	0.117	0.000795774
epithelial-like cells	Iscu	0.454999	1	0.609	0.271	0.00080138
epithelial-like cells	2510002D24Rik	0.549499	1	0.304	0.089	0.000811046
epithelial-like cells	Gapdh	0.530158	1	0.739	0.493	0.00082092
epithelial-like cells	Myl6	0.575173	1	0.739	0.545	0.00082364
epithelial-like cells	Cd47	0.646735	1	0.696	0.408	0.000825147
epithelial-like cells	Chtop	0.275968	1	0.435	0.147	0.000838883
epithelial-like cells	Prl	0.344021	1	0.304	0.091	0.000856377
epithelial-like cells	Tmem176a	0.594074	1	0.696	0.428	0.00088908
epithelial-like cells	Myl12b	0.515857	1	0.565	0.24	0.000901558
epithelial-like cells	Jun	0.712811	1	0.739	0.388	0.000930646
epithelial-like cells	Gnas	0.325442	1	1	0.644	0.000947872
epithelial-like cells	Psmb2	0.442665	1	0.565	0.242	0.00102599
epithelial-like cells	Arhgef2	0.316262	1	0.435	0.15	0.0010341
epithelial-like cells	Msi1	0.559088	1	0.391	0.143	0.00103638
epithelial-like cells	Bcl9	0.351407	1	0.261	0.069	0.00103944
epithelial-like cells	Zfand3	0.447238	1	0.261	0.073	0.00104029
epithelial-like cells	Ctbp2	0.418296	1	0.261	0.069	0.00105058
epithelial-like cells	Rbfox2	0.536733	1	0.304	0.095	0.00105102
epithelial-like cells	Mkrn1	0.681021	1	0.348	0.121	0.00106169
epithelial-like cells	Plxnb1	0.55227	1	0.348	0.117	0.00106753
epithelial-like cells	Serbp1	0.501893	1	0.783	0.43	0.00108781
epithelial-like cells	Rbbp6	0.470742	1	0.565	0.248	0.00111002
epithelial-like cells	BC029214	0.569966	1	0.435	0.17	0.00114156
epithelial-like cells	Chpt1	0.597988	1	0.609	0.309	0.0011464
epithelial-like cells	Csnk1a1	0.577255	1	0.696	0.408	0.0011828
epithelial-like cells	Zfp106	0.430506	1	0.391	0.137	0.00119462
epithelial-like cells	Elavl1	0.499616	1	0.391	0.141	0.00119794
epithelial-like cells	Gstt1	0.739581	1	0.391	0.152	0.0012379
epithelial-like cells	Chd1	0.550973	1	0.261	0.075	0.00126764
epithelial-like cells	Zbtb20	0.498025	1	0.826	0.653	0.00131268
epithelial-like cells	Pafah1b1	0.422385	1	0.478	0.19	0.00135428
epithelial-like cells	Cystm1	0.549566	1	0.565	0.255	0.00136018
epithelial-like cells	Pkm	0.448472	1	0.739	0.412	0.0013677
epithelial-like cells	Ghitm	0.437948	1	0.435	0.164	0.00137692
epithelial-like cells	Bola3	0.618648	1	0.609	0.299	0.00140152
epithelial-like cells	Mrpl54	0.496042	1	0.478	0.2	0.00142857
epithelial-like cells	Psmd7	0.695324	1	0.391	0.154	0.00148389
epithelial-like cells	Parva	0.639242	1	0.261	0.073	0.00149181
epithelial-like cells	Abcd3	0.485148	1	0.348	0.121	0.00149414
epithelial-like cells	Tef	0.611231	1	0.304	0.099	0.00149564
epithelial-like cells	Cdc73	0.409113	1	0.391	0.137	0.00152456
epithelial-like cells	Prmt1	0.324922	1	0.348	0.117	0.00154676
epithelial-like cells	Stard10	0.299175	1	0.261	0.071	0.0015852
epithelial-like cells	Zfp462	0.511827	1	0.348	0.121	0.00161517
epithelial-like cells	Yme1l1	0.446118	1	0.609	0.283	0.00163812
epithelial-like cells	Tlr3	0.424392	1	0.261	0.073	0.00166735
epithelial-like cells	Tmem41b	0.419655	1	0.261	0.075	0.00168045
epithelial-like cells	Ubxn1	0.549039	1	0.522	0.24	0.00171178
epithelial-like cells	Ptges3	0.441612	1	0.652	0.343	0.00176285
epithelial-like cells	Snrpd3	0.534728	1	0.478	0.216	0.0017675
epithelial-like cells	Ank3	0.412897	1	0.391	0.141	0.00177733
epithelial-like cells	Rab22a	0.27754	1	0.304	0.091	0.00177889
epithelial-like cells	Man2a2	0.452224	1	0.348	0.121	0.00178819
epithelial-like cells	Itpr2	0.302992	1	0.304	0.091	0.00179517
epithelial-like cells	Polr2f	0.397428	1	0.652	0.321	0.0018308
epithelial-like cells	Zkscan1	0.290303	1	0.261	0.073	0.00186171
epithelial-like cells	Pxdc1	0.710002	1	0.261	0.075	0.00187406
epithelial-like cells	Slc4a2	0.406284	1	0.261	0.075	0.00189264
epithelial-like cells	Fam76b	0.391919	1	0.261	0.075	0.00189264
epithelial-like cells	Anp32e	0.440393	1	0.391	0.149	0.00192554
epithelial-like cells	Znfx1	0.361196	1	0.261	0.075	0.00200772
epithelial-like cells	Atp5a1	0.551097	1	0.652	0.384	0.00201347
epithelial-like cells	Alkbh5	0.50551	1	0.391	0.154	0.00203692
epithelial-like cells	Cbx5	0.39137	1	0.565	0.25	0.00204266
epithelial-like cells	Cops7a	0.281258	1	0.348	0.113	0.00208404
epithelial-like cells	Zfhx4	0.634249	1	0.435	0.182	0.002086
epithelial-like cells	Rmnd5a	0.543126	1	0.261	0.077	0.00213677
epithelial-like cells	Rspry1	0.486046	1	0.304	0.099	0.00214663
epithelial-like cells	Gadd45g	0.317641	1	0.391	0.139	0.00215936
epithelial-like cells	Tprgl	0.365561	1	0.391	0.143	0.00218189
epithelial-like cells	Tpd52	0.413411	1	0.478	0.2	0.00218627
epithelial-like cells	Diablo	0.504554	1	0.304	0.101	0.00220585
epithelial-like cells	Nfib	0.4911	1	0.739	0.384	0.00223406
epithelial-like cells	Psmb7	0.505434	1	0.391	0.149	0.00229755
epithelial-like cells	Uqcrc1	0.308251	1	0.435	0.162	0.00232302
epithelial-like cells	Cd2ap	0.509063	1	0.391	0.152	0.00246297
epithelial-like cells	Arhgap21	0.481707	1	0.261	0.081	0.00249045
epithelial-like cells	Pebp1	0.431415	1	0.696	0.428	0.00251378
epithelial-like cells	Slain2	0.445853	1	0.304	0.099	0.00252888
epithelial-like cells	Mlc1	0.796644	1	0.304	0.101	0.00252919
epithelial-like cells	Stt3b	0.285142	1	0.348	0.117	0.00254154
epithelial-like cells	Taok1	0.446824	1	0.435	0.184	0.00255863
epithelial-like cells	Neat1	0.685845	1	0.565	0.297	0.00257645
epithelial-like cells	Smarca4	0.591436	1	0.304	0.099	0.00261689
epithelial-like cells	Tecpr2	0.555466	1	0.304	0.105	0.00267503
epithelial-like cells	Ndufs2	0.477708	1	0.435	0.182	0.00269414
epithelial-like cells	Cirbp	0.551485	1	0.565	0.297	0.0026949
epithelial-like cells	Prelp	0.420839	1	0.478	0.206	0.00270185
epithelial-like cells	Sde2	0.33124	1	0.261	0.077	0.00271413
epithelial-like cells	Arid2	0.37697	1	0.304	0.101	0.00272958
epithelial-like cells	Sox2	0.789365	1	0.391	0.176	0.00275022
epithelial-like cells	Tmco1	0.571477	1	0.652	0.35	0.00276543
epithelial-like cells	Sptbn1	0.48074	1	0.565	0.265	0.0027811
epithelial-like cells	Ssna1	0.489039	1	0.304	0.105	0.00278864
epithelial-like cells	Capns1	0.580846	1	0.522	0.259	0.00290937
epithelial-like cells	Cx3cl1	0.596356	1	0.304	0.109	0.0029319
epithelial-like cells	Anxa3	0.369807	1	0.304	0.097	0.00294789
epithelial-like cells	Stx4a	0.389408	1	0.435	0.176	0.00295933
epithelial-like cells	Dlg1	0.252186	1	0.304	0.099	0.00297246
epithelial-like cells	Smad4	0.405888	1	0.261	0.079	0.00297862
epithelial-like cells	Cd82	0.456633	1	0.261	0.081	0.00299828
epithelial-like cells	Ppp1cb	0.424432	1	0.522	0.251	0.00310874
epithelial-like cells	Ltbp3	0.47408	1	0.391	0.15	0.00321422
epithelial-like cells	Dnajb4	0.450169	1	0.304	0.107	0.00324783
epithelial-like cells	Rwdd4a	0.455203	1	0.261	0.081	0.00331626
epithelial-like cells	Gng11	0.562417	1	0.348	0.135	0.00347448
epithelial-like cells	Adprh	0.416653	1	0.348	0.125	0.00349878
epithelial-like cells	Oat	0.475028	1	0.435	0.192	0.00352699
epithelial-like cells	Snx3	0.620635	1	0.478	0.22	0.00356478
epithelial-like cells	H3f3a	0.37889	1	0.87	0.65	0.00358336
epithelial-like cells	Foxp2	0.297779	1	0.261	0.079	0.0036482
epithelial-like cells	Cd164	0.432708	1	0.696	0.402	0.00364961
epithelial-like cells	Pafah1b2	0.341667	1	0.435	0.178	0.00371085
epithelial-like cells	Vps50	0.326511	1	0.261	0.079	0.00373237
epithelial-like cells	Stra13	0.488728	1	0.435	0.186	0.00376586
epithelial-like cells	Ap2m1	0.478184	1	0.435	0.188	0.00396159
epithelial-like cells	Hsd17b10	0.440828	1	0.304	0.109	0.00397932
epithelial-like cells	Fam104a	0.354187	1	0.391	0.152	0.00400365
epithelial-like cells	Epb41l5	0.412418	1	0.261	0.083	0.00405508
epithelial-like cells	Atn1.1	0.437877	1	0.304	0.105	0.00406001
epithelial-like cells	Zmym4	0.417643	1	0.261	0.083	0.0040912
epithelial-like cells	Cnot6l	0.475452	1	0.391	0.158	0.00413799
epithelial-like cells	Shisa4	0.4128	1	0.261	0.083	0.00421994
epithelial-like cells	Cacfd1	0.460498	1	0.261	0.083	0.00423864
epithelial-like cells	Anxa6	0.375656	1	0.391	0.158	0.00428028
epithelial-like cells	Chmp2b	0.502559	1	0.261	0.087	0.0043132
epithelial-like cells	Wbp5	0.58162	1	0.739	0.477	0.0043331
epithelial-like cells	Taldo1	0.619623	1	0.435	0.194	0.0044889
epithelial-like cells	Tspo	0.469763	1	0.522	0.23	0.00451966
epithelial-like cells	Rp9	0.551449	1	0.435	0.196	0.00454949
epithelial-like cells	Acin1	0.376628	1	0.478	0.212	0.00467507
epithelial-like cells	Uchl1	0.294835	1	0.304	0.103	0.00467763
epithelial-like cells	Chrac1	0.536455	1	0.348	0.135	0.00471101
epithelial-like cells	Atp6v1f	0.48184	1	0.783	0.436	0.00471491
epithelial-like cells	Ergic1	0.463684	1	0.348	0.133	0.00476439
epithelial-like cells	Fosb	0.652736	1	0.478	0.238	0.00477572
epithelial-like cells	Socs6	0.457182	1	0.304	0.107	0.00480412
epithelial-like cells	H2afz	0.493578	1	0.652	0.394	0.00480632
epithelial-like cells	Il6st	0.358621	1	0.391	0.156	0.00485923
epithelial-like cells	Per3	0.414541	1	0.304	0.109	0.00507394
epithelial-like cells	Gtf2h5	0.696769	1	0.435	0.208	0.00510347
epithelial-like cells	Chek2	0.359177	1	0.304	0.111	0.00514832
epithelial-like cells	Szrd1	0.416894	1	0.261	0.085	0.00522205
epithelial-like cells	Nus1	0.528577	1	0.261	0.087	0.00525419
epithelial-like cells	Klf9	0.466555	1	0.261	0.085	0.00531239
epithelial-like cells	Fkbp1a	0.568897	1	0.652	0.376	0.00532453
epithelial-like cells	Hipk1	0.270247	1	0.391	0.149	0.00538235
epithelial-like cells	Actn1	0.339862	1	0.435	0.182	0.00544309
epithelial-like cells	Vat1	0.252633	1	0.348	0.129	0.00550149
epithelial-like cells	Cul4a	0.250318	1	0.261	0.083	0.00550725
epithelial-like cells	Fcgrt	0.411423	1	0.261	0.087	0.00562264
epithelial-like cells	Tm9sf3	0.463901	1	0.565	0.305	0.00564823
epithelial-like cells	Sqstm1	0.511628	1	0.478	0.222	0.00571154
epithelial-like cells	Itm2b	0.415439	1	1	0.869	0.00575591
epithelial-like cells	Cyb5r3	0.415301	1	0.348	0.137	0.00579238
epithelial-like cells	Sox9	0.403803	1	0.478	0.212	0.00595885
epithelial-like cells	Eci2	0.337303	1	0.304	0.109	0.00596306
epithelial-like cells	Sox11	0.556967	1	0.348	0.139	0.00600179
epithelial-like cells	Dync1i2	0.477557	1	0.739	0.477	0.00609778
epithelial-like cells	2610507B11Rik	0.543179	1	0.304	0.115	0.00628131
epithelial-like cells	Wasl	0.304233	1	0.391	0.154	0.00645878
epithelial-like cells	Hsp90aa1	0.39805	1	0.783	0.527	0.00650768
epithelial-like cells	Agtrap	0.480215	1	0.304	0.117	0.00653843
epithelial-like cells	Srsf3	0.401817	1	0.652	0.382	0.00654605
epithelial-like cells	Ube2v2	0.604527	1	0.304	0.119	0.00655408
epithelial-like cells	Svbp	0.47426	1	0.348	0.137	0.00656127
epithelial-like cells	Psip1	0.254004	1	0.391	0.154	0.00658681
epithelial-like cells	Egr2	0.322931	1	0.261	0.087	0.00659281
epithelial-like cells	Ppp2r1a	0.418643	1	0.348	0.139	0.00660792
epithelial-like cells	Pigyl	0.431575	1	0.304	0.115	0.00671444
epithelial-like cells	Pea15a	0.430187	1	0.478	0.22	0.00672978
epithelial-like cells	Nceh1	0.480441	1	0.261	0.091	0.00673357
epithelial-like cells	Hbp1	0.39571	1	0.304	0.113	0.00686745
epithelial-like cells	Hmgb1	0.514744	1	0.783	0.586	0.00687665
epithelial-like cells	Pgrmc1	0.524526	1	0.478	0.228	0.00689719
epithelial-like cells	2018-09-07	0.263671	1	0.565	0.255	0.00693652
epithelial-like cells	Kmt2c	0.26057	1	0.478	0.208	0.00696372
epithelial-like cells	Slitrk6	0.482386	1	0.261	0.093	0.00701644
epithelial-like cells	1810037I17Rik	0.412224	1	0.696	0.416	0.00702834
epithelial-like cells	Cfl2	0.398258	1	0.478	0.224	0.00707131
epithelial-like cells	Tsen34	0.470248	1	0.391	0.168	0.00707981
epithelial-like cells	Rnf138	0.350386	1	0.261	0.087	0.00710289
epithelial-like cells	1300002E11Rik	0.621286	1	0.261	0.095	0.00735688
epithelial-like cells	Rab11b	0.301332	1	0.478	0.214	0.00735971
epithelial-like cells	Ccnd3	0.390987	1	0.391	0.172	0.00758021
epithelial-like cells	Pnkd	0.329002	1	0.391	0.162	0.00769479
epithelial-like cells	Med28	0.403343	1	0.522	0.271	0.00793591
epithelial-like cells	Ndufs4	0.321084	1	0.391	0.16	0.00811142
epithelial-like cells	Eif1	0.482343	1	0.87	0.802	0.00820715
epithelial-like cells	Atf3	0.846856	1	0.348	0.145	0.00826962
epithelial-like cells	Ogdh	0.438839	1	0.391	0.166	0.00830179
epithelial-like cells	Maml2	0.705111	1	0.261	0.089	0.0083715
epithelial-like cells	Cadps2	0.476356	1	0.304	0.119	0.00837598
[truncated: 505 more rows]
