# Supplementary material for: Single-Cell Molecular and Cellular Architecture of the Mouse Neurohypophysis
Source: eNeuro. 2020 Jan 16;7(1):ENEURO.0345-19.2019. doi: 10.1523/ENEURO.0345-19.2019 (PMC6984808; doi:10.1523/ENEURO.0345-19.2019)
Supplement: Extended Data Figure 1-3 — The filtered list of normalized differentially expressed genes. List of normalized differentially expressed genes in each cell type displaying an average log2 fold change ≥ 1 and adjusted p ≤ 0.05. Download Figure 1-3, XLSX file. [file sup_enu-eN-NWR-0345-19-s08.xlsx]

## Sheet: Summary
Cutoff: Ave LogFC > 1, padj <0.05
Cluster	Normalized differentially expressed gene number
Pituicyte	81
Intermediate lobe cells	45
Macrophage/microglia	144
T-cell like	141
Epithelial-like cells	61
Vascular endothelia	133
VLMC	74

## Sheet: P
cluster	gene	avg_logFC	p_val_adj	pct.1	pct.2	p_val
pituicyte	Ptn	2.82624	1.47447e-75	0.954	0.229	9.81346e-80
pituicyte	Col25a1	2.76224	8.38215e-82	0.878	0.024	5.5788e-86
pituicyte	Scn7a	2.57513	1.5667e-74	0.852	0.042	1.04273e-78
pituicyte	Col13a1	2.39138	9.55756e-68	0.791	0.039	6.3611e-72
pituicyte	Gpc3	2.20506	8.01948e-63	0.781	0.048	5.33742e-67
pituicyte	Cldn10	2.18352	2.61115e-55	0.673	0.024	1.73787e-59
pituicyte	Tbx3os1	2.15881	7.52255e-64	0.724	0.012	5.00669e-68
pituicyte	Mest	2.01152	9.92664e-60	0.929	0.377	6.60675e-64
pituicyte	Bcan	1.97822	2.96694e-51	0.628	0.021	1.97467e-55
pituicyte	Lrrtm3	1.94132	5.73276e-54	0.643	0.012	3.81548e-58
pituicyte	Arl6ip1	1.84227	3.4579e-60	0.954	0.449	2.30143e-64
pituicyte	Fndc3c1	1.82408	1.23195e-58	0.704	0.021	8.19931e-63
pituicyte	Gja1	1.81736	9.53999e-56	0.704	0.033	6.34941e-60
pituicyte	Vegfa	1.80499	3.15297e-52	0.638	0.018	2.09848e-56
pituicyte	Slc1a3	1.7924	3.12447e-47	0.73	0.111	2.07951e-51
pituicyte	Srebf1	1.77825	7.64446e-50	0.719	0.081	5.08783e-54
pituicyte	Slc4a4	1.74714	4.27468e-52	0.612	0.006	2.84504e-56
pituicyte	Lmo1	1.74537	8.98063e-50	0.679	0.054	5.97712e-54
pituicyte	Grik3	1.71952	1.71908e-48	0.643	0.045	1.14415e-52
pituicyte	Abca8a	1.71927	3.50336e-46	0.602	0.024	2.33168e-50
pituicyte	Adm	1.66699	1.74472e-40	0.541	0.021	1.16121e-44
pituicyte	Ntrk2	1.66487	2.36512e-46	0.709	0.105	1.57413e-50
pituicyte	Fgf10	1.62794	2.63073e-46	0.587	0.015	1.7509e-50
pituicyte	Cysltr1	1.61282	1.55666e-42	0.612	0.048	1.03604e-46
pituicyte	Igfbp4	1.59132	2.12884e-46	0.74	0.105	1.41686e-50
pituicyte	Igfbp5	1.57691	3.64451e-49	0.847	0.19	2.42563e-53
pituicyte	Cdh2	1.5707	8.47941e-35	0.709	0.217	5.64354e-39
pituicyte	Col23a1	1.56182	4.01498e-40	0.541	0.021	2.6722e-44
pituicyte	Hmcn1	1.53158	3.8086e-33	0.505	0.036	2.53484e-37
pituicyte	Fat3	1.52223	3.97119e-41	0.526	0.012	2.64306e-45
pituicyte	Fzd5	1.4765	2.70684e-38	0.505	0.015	1.80156e-42
pituicyte	Tbx3	1.44015	4.3213e-39	0.485	0.003	2.87607e-43
pituicyte	Car14	1.43612	2.62537e-31	0.439	0.015	1.74733e-35
pituicyte	Rax	1.43421	1.73282e-37	0.49	0.009	1.15329e-41
pituicyte	Hes1	1.38751	2.73457e-23	0.526	0.093	1.82001e-27
pituicyte	Plppr1	1.36731	6.5175e-30	0.449	0.024	4.33777e-34
pituicyte	Fgfr1	1.36338	6.25652e-35	0.582	0.066	4.16407e-39
pituicyte	Csrp1	1.35658	8.41106e-34	0.663	0.142	5.59805e-38
pituicyte	Zfand6	1.35281	1.31317e-37	0.837	0.37	8.73992e-42
pituicyte	Xpr1	1.35188	7.20169e-36	0.73	0.205	4.79314e-40
pituicyte	Sox9	1.34669	1.66371e-28	0.5	0.06	1.10729e-32
pituicyte	Hist1h2bc	1.32765	6.44881e-33	0.75	0.253	4.29205e-37
pituicyte	Nkx2-1	1.32384	2.16403e-31	0.408	0.003	1.44029e-35
pituicyte	Atp1a2	1.30118	8.30071e-25	0.52	0.099	5.5246e-29
pituicyte	Islr	1.29369	1.0653e-33	0.485	0.021	7.09019e-38
pituicyte	Rgs7bp	1.28205	6.62441e-27	0.418	0.027	4.40892e-31
pituicyte	Gldc	1.25957	2.41712e-25	0.372	0.012	1.60873e-29
pituicyte	Tmem47	1.24091	1.75007e-27	0.531	0.084	1.16477e-31
pituicyte	G0s2	1.22875	3.66279e-24	0.429	0.042	2.4378e-28
pituicyte	Gria3	1.21895	2.98342e-29	0.418	0.015	1.98564e-33
pituicyte	Pcdh9	1.20847	2.97469e-21	0.546	0.157	1.97983e-25
pituicyte	Tspan7	1.18519	1.43577e-21	0.531	0.133	9.55589e-26
pituicyte	Ifi27	1.17521	8.00233e-28	0.755	0.334	5.32601e-32
pituicyte	Ano6	1.1722	1.98788e-25	0.561	0.127	1.32305e-29
pituicyte	A2m	1.15233	1.1668e-21	0.306	0.003	7.7657e-26
pituicyte	Rgcc	1.15009	1.1545e-28	0.607	0.127	7.68389e-33
pituicyte	Ano1	1.14629	6.05048e-22	0.301	0	4.02694e-26
pituicyte	Metrn	1.14406	3.59274e-25	0.444	0.045	2.39118e-29
pituicyte	Mecom	1.14266	2.43376e-19	0.362	0.039	1.6198e-23
pituicyte	Htra1	1.136	2.31531e-27	0.367	0.003	1.54097e-31
pituicyte	Mgat5	1.12845	8.59557e-18	0.515	0.157	5.72084e-22
pituicyte	Lhx2	1.12506	1.02574e-26	0.372	0.006	6.82687e-31
pituicyte	Slc16a2	1.12178	1.26061e-23	0.434	0.051	8.39008e-28
pituicyte	Spon1	1.11954	7.13389e-28	0.393	0.009	4.74801e-32
pituicyte	Lgr4	1.11696	3.37752e-19	0.408	0.063	2.24793e-23
pituicyte	Nfib	1.11271	9.08885e-28	0.704	0.22	6.04915e-32
pituicyte	Pbx1	1.09256	2.81503e-28	0.755	0.31	1.87357e-32
pituicyte	Antxr1	1.08105	1.72351e-22	0.367	0.024	1.1471e-26
pituicyte	Timp3	1.0792	4.75844e-32	0.684	0.136	3.16701e-36
pituicyte	Nt5dc2	1.05906	7.68047e-23	0.352	0.015	5.11179e-27
pituicyte	Lpar4	1.05468	6.42535e-21	0.332	0.015	4.27644e-25
pituicyte	Dtna	1.05133	1.60058e-20	0.357	0.03	1.06528e-24
pituicyte	Dbi	1.04346	1.27106e-28	0.801	0.331	8.45961e-33
pituicyte	Lman1	1.04081	5.67922e-17	0.5	0.151	3.77985e-21
pituicyte	Fign	1.03478	2.21673e-18	0.321	0.024	1.47536e-22
pituicyte	Slc6a6	1.02638	1.34713e-11	0.622	0.349	8.96593e-16
pituicyte	Fbln2	1.02514	3.37124e-18	0.276	0.006	2.24376e-22
pituicyte	Scd2	1.02041	6.44032e-19	0.582	0.196	4.2864e-23
pituicyte	Abca8b	1.00992	7.59737e-16	0.367	0.063	5.05649e-20
pituicyte	Cdkn1c	1.00496	1.46091e-19	0.342	0.027	9.72318e-24
pituicyte	Atp1a1	1.0037	1.2351e-18	0.628	0.241	8.22031e-23

## Sheet: IL
cluster	gene	avg_logFC	p_val_adj	pct.1	pct.2	p_val
intermediate lobe cells	Pomc	4.02972	2.04403e-60	0.986	0.589	1.36042e-64
intermediate lobe cells	Pcsk2	3.61069	2.63526e-83	0.878	0.037	1.75392e-87
intermediate lobe cells	Pcsk1n	2.2476	1.23929e-63	0.946	0.271	8.24815e-68
intermediate lobe cells	Oacyl	2.20747	4.32986e-65	0.703	0.011	2.88177e-69
intermediate lobe cells	Resp18	2.02405	1.69698e-71	0.831	0.045	1.12944e-75
intermediate lobe cells	Bex2	2.01628	4.04943e-64	0.878	0.134	2.69513e-68
intermediate lobe cells	Nr4a2	2.00764	5.66323e-44	0.642	0.066	3.7692e-48
intermediate lobe cells	Scg2	1.96352	1.73089e-76	0.851	0.034	1.15201e-80
intermediate lobe cells	Meg3	1.94368	6.77415e-54	0.959	0.508	4.50859e-58
intermediate lobe cells	Gnas	1.94195	7.80395e-62	0.986	0.532	5.19398e-66
intermediate lobe cells	Chga	1.90522	2.73738e-67	0.797	0.039	1.82188e-71
intermediate lobe cells	Snap25	1.87165	1.56619e-69	0.764	0.021	1.04239e-73
intermediate lobe cells	Gria2	1.69801	1.05939e-61	0.676	0.011	7.05088e-66
intermediate lobe cells	Syt1	1.66	1.14794e-61	0.723	0.029	7.64019e-66
intermediate lobe cells	Scg5	1.65493	1.57415e-59	0.804	0.084	1.04769e-63
intermediate lobe cells	Chgb	1.64036	9.63133e-51	0.628	0.029	6.4102e-55
intermediate lobe cells	Ly6h	1.60028	4.40837e-55	0.791	0.074	2.93403e-59
intermediate lobe cells	Nap1l5	1.59314	6.12331e-51	0.682	0.05	4.07541e-55
intermediate lobe cells	Alcam	1.52554	8.91845e-47	0.635	0.045	5.93574e-51
intermediate lobe cells	Ptprn	1.51769	1.03605e-60	0.669	0.013	6.8955e-65
intermediate lobe cells	Pde10a	1.50302	1.71926e-38	0.486	0.016	1.14426e-42
intermediate lobe cells	Cpe	1.50075	2.32262e-44	0.811	0.174	1.54584e-48
intermediate lobe cells	Cnot3	1.47278	8.35558e-17	0.959	0.729	5.56112e-21
intermediate lobe cells	Ascl1	1.45832	4.26123e-51	0.601	0.018	2.83609e-55
intermediate lobe cells	5330417C22Rik	1.4314	1.95072e-55	0.662	0.024	1.29831e-59
intermediate lobe cells	Mcc	1.30642	3.85592e-38	0.635	0.079	2.56634e-42
intermediate lobe cells	Syt4	1.30259	2.06088e-47	0.595	0.024	1.37164e-51
intermediate lobe cells	Snhg11	1.27633	7.03904e-30	0.493	0.05	4.68488e-34
intermediate lobe cells	Pabpc1l	1.25216	8.13145e-48	0.561	0.013	5.41195e-52
intermediate lobe cells	Rit2	1.23791	4.99585e-45	0.554	0.018	3.32503e-49
intermediate lobe cells	Calb1	1.2298	3.44338e-37	0.547	0.042	2.29176e-41
intermediate lobe cells	Ngfrap1	1.18586	5.80661e-35	0.764	0.187	3.86463e-39
intermediate lobe cells	Esm1	1.17998	1.80631e-37	0.466	0.011	1.2022e-41
intermediate lobe cells	Sphkap	1.17096	3.06337e-45	0.527	0.011	2.03885e-49
intermediate lobe cells	Pnmal2	1.15775	6.79723e-38	0.588	0.061	4.52395e-42
intermediate lobe cells	Rorb	1.15236	2.1115e-39	0.514	0.021	1.40533e-43
intermediate lobe cells	Nr4a1	1.12417	7.54761e-27	0.628	0.121	5.02337e-31
intermediate lobe cells	Fam183b	1.11866	1.79387e-38	0.486	0.016	1.19392e-42
intermediate lobe cells	Wbp5	1.09942	8.07311e-33	0.878	0.337	5.37312e-37
intermediate lobe cells	Peg3	1.09015	2.71005e-25	0.77	0.253	1.8037e-29
intermediate lobe cells	Dner	1.07703	2.65323e-37	0.48	0.016	1.76588e-41
intermediate lobe cells	Celf3	1.05575	3.18393e-32	0.412	0.011	2.11909e-36
intermediate lobe cells	Auts2	1.04552	1.20828e-27	0.642	0.132	8.04178e-32
intermediate lobe cells	Trp53i11	1.03185	7.58903e-32	0.52	0.047	5.05094e-36
intermediate lobe cells	Rab26os	1.02702	7.42626e-28	0.757	0.213	4.9426e-32

## Sheet: Mm
cluster	gene	avg_logFC	p_val_adj	pct.1	pct.2	p_val
Macrophage/microglia	C1qa	3.78905	6.14291e-87	0.937	0.042	4.08846e-91
Macrophage/microglia	C1qc	3.46947	5.10309e-81	0.926	0.058	3.3964e-85
Macrophage/microglia	C1qb	3.46796	3.18025e-84	0.947	0.055	2.11664e-88
Macrophage/microglia	Ccl4	3.44308	7.74274e-39	0.632	0.074	5.15324e-43
Macrophage/microglia	Ctss	3.43782	1.12998e-87	0.958	0.048	7.52068e-92
Macrophage/microglia	Ccl12	3.12118	6.05824e-36	0.442	0.014	4.03211e-40
Macrophage/microglia	Cx3cr1	3.08906	2.27178e-84	0.884	0.028	1.512e-88
Macrophage/microglia	Tyrobp	2.95096	2.67197e-84	0.947	0.048	1.77835e-88
Macrophage/microglia	Ctsd	2.92755	1.54275e-43	0.874	0.268	1.02679e-47
Macrophage/microglia	Ccl3	2.92558	8.26586e-41	0.526	0.025	5.5014e-45
Macrophage/microglia	Cd74	2.85492	1.466e-19	0.505	0.102	9.75707e-24
Macrophage/microglia	Ly86	2.72988	9.9834e-86	0.874	0.018	6.64453e-90
Macrophage/microglia	Fcer1g	2.69713	6.15547e-85	0.979	0.062	4.09682e-89
Macrophage/microglia	Csf1r	2.61174	4.68023e-77	0.779	0.012	3.11496e-81
Macrophage/microglia	Hexb	2.60294	4.94843e-61	0.884	0.113	3.29347e-65
Macrophage/microglia	Lyz2	2.52697	1.1053e-50	0.632	0.03	7.35642e-55
Macrophage/microglia	Il1b	2.52065	3.04779e-46	0.505	0.007	2.02848e-50
Macrophage/microglia	Cst3	2.4698	6.17911e-43	0.989	0.767	4.11255e-47
Macrophage/microglia	Sepp1	2.43803	8.74999e-42	0.895	0.3	5.82362e-46
Macrophage/microglia	Lgmn	2.37706	1.49656e-49	0.789	0.115	9.96045e-54
Macrophage/microglia	Trem2	2.29435	5.7215e-66	0.716	0.018	3.80798e-70
Macrophage/microglia	Rgs10	2.24337	2.25528e-74	0.874	0.048	1.50102e-78
Macrophage/microglia	Aif1	2.23537	3.47385e-57	0.674	0.028	2.31204e-61
Macrophage/microglia	H2-Ab1	2.18893	2.1279e-07	0.274	0.058	1.41624e-11
Macrophage/microglia	Adap2os	2.15454	4.65313e-71	0.737	0.012	3.09693e-75
Macrophage/microglia	Apoe	2.12303	3.11603e-12	0.821	0.594	2.07389e-16
Macrophage/microglia	H2-Eb1	2.08569	1.11931e-09	0.263	0.039	7.44965e-14
Macrophage/microglia	Lair1	2.05495	3.46066e-68	0.663	0	2.30327e-72
Macrophage/microglia	Ctsz	2.03439	4.12094e-43	0.768	0.132	2.74272e-47
Macrophage/microglia	Fcgr3	2.0094	2.87363e-56	0.621	0.014	1.91256e-60
Macrophage/microglia	Mef2c	2.00249	2.48718e-60	0.821	0.067	1.65536e-64
Macrophage/microglia	Hk2	1.99213	4.56466e-55	0.6	0.012	3.03804e-59
Macrophage/microglia	Mpeg1	1.96667	2.25201e-59	0.621	0.007	1.49884e-63
Macrophage/microglia	Ftl1	1.9465	7.40956e-44	1	0.744	4.93149e-48
Macrophage/microglia	Ctsh	1.94379	6.8697e-42	0.737	0.115	4.57218e-46
Macrophage/microglia	Lst1	1.92214	1.27598e-53	0.653	0.03	8.49238e-58
Macrophage/microglia	Kctd12	1.92015	1.34832e-44	0.611	0.042	8.97387e-49
Macrophage/microglia	Laptm5	1.90927	7.46187e-51	0.768	0.074	4.9663e-55
Macrophage/microglia	Pld4	1.89602	2.50977e-59	0.632	0.009	1.67039e-63
Macrophage/microglia	Gpr34	1.8912	9.89337e-52	0.558	0.007	6.58461e-56
Macrophage/microglia	Zeb2	1.88091	1.93844e-49	0.621	0.03	1.29014e-53
Macrophage/microglia	Siglech	1.84931	4.19823e-45	0.484	0.005	2.79416e-49
Macrophage/microglia	Ctsc	1.84496	4.56792e-52	0.6	0.018	3.04022e-56
Macrophage/microglia	Fcrls	1.82985	5.35133e-45	0.484	0.005	3.56162e-49
Macrophage/microglia	Pou2f2	1.82499	9.24299e-38	0.674	0.097	6.15174e-42
Macrophage/microglia	Sat1	1.81354	4.28663e-36	0.821	0.208	2.853e-40
Macrophage/microglia	Ctsb	1.80227	1.08651e-31	0.916	0.543	7.23134e-36
Macrophage/microglia	Fyb	1.78759	2.86288e-45	0.674	0.055	1.90541e-49
Macrophage/microglia	Ccl2	1.77136	3.69527e-25	0.316	0.007	2.45942e-29
Macrophage/microglia	Cd83	1.7697	3.9022e-29	0.379	0.014	2.59714e-33
Macrophage/microglia	Cybb	1.73514	3.62627e-46	0.505	0.007	2.41349e-50
Macrophage/microglia	Slc15a3	1.73219	1.58461e-42	0.463	0.005	1.05465e-46
Macrophage/microglia	Bin2	1.68858	3.06615e-40	0.526	0.025	2.0407e-44
Macrophage/microglia	Tmem119	1.67542	6.74482e-44	0.463	0.002	4.48907e-48
Macrophage/microglia	Tgfbr1	1.67155	1.84589e-31	0.611	0.097	1.22855e-35
Macrophage/microglia	Adap2	1.6695	4.99969e-51	0.516	0	3.32758e-55
Macrophage/microglia	Irf8	1.66208	5.77256e-34	0.526	0.044	3.84197e-38
Macrophage/microglia	Mafb	1.66097	2.0186e-37	0.516	0.032	1.3435e-41
Macrophage/microglia	Marcks	1.65848	2.41004e-33	0.832	0.277	1.60402e-37
Macrophage/microglia	Grn	1.65294	2.30324e-30	0.758	0.212	1.53294e-34
Macrophage/microglia	AF251705	1.64582	5.23462e-45	0.484	0.005	3.48394e-49
Macrophage/microglia	Serinc3	1.6234	2.85803e-35	0.905	0.319	1.90218e-39
Macrophage/microglia	Cd14	1.62101	2.42453e-24	0.316	0.009	1.61366e-28
Macrophage/microglia	Hpgds	1.61283	2.05003e-32	0.558	0.065	1.36442e-36
Macrophage/microglia	Spi1	1.60138	1.82691e-40	0.484	0.014	1.21591e-44
Macrophage/microglia	Crybb1	1.59326	6.24483e-26	0.358	0.016	4.15629e-30
Macrophage/microglia	Nfkbia	1.57839	9.24122e-15	0.495	0.132	6.15056e-19
Macrophage/microglia	Tmsb4x	1.57573	3.58172e-36	1	0.797	2.38384e-40
Macrophage/microglia	Unc93b1	1.57136	2.3652e-32	0.516	0.048	1.57418e-36
Macrophage/microglia	Cd53	1.54766	6.72506e-38	0.6	0.051	4.47592e-42
Macrophage/microglia	Fcgr2b	1.5183	7.46758e-38	0.432	0.007	4.97011e-42
Macrophage/microglia	B2m	1.5166	1.01707e-36	0.989	0.591	6.76921e-41
Macrophage/microglia	Cd68	1.49676	4.09695e-44	0.537	0.018	2.72676e-48
Macrophage/microglia	P2ry6	1.4911	3.24131e-31	0.347	0.002	2.15728e-35
Macrophage/microglia	Selplg	1.48705	1.23168e-24	0.516	0.069	8.19751e-29
Macrophage/microglia	Olfml3	1.48536	8.83018e-28	0.421	0.028	5.87699e-32
Macrophage/microglia	Ltc4s	1.48199	1.79701e-32	0.347	0	1.19601e-36
Macrophage/microglia	Zfp36	1.47527	3.01196e-15	0.6	0.215	2.00463e-19
Macrophage/microglia	Plek	1.46686	1.03771e-34	0.432	0.014	6.90657e-39
Macrophage/microglia	Gatm	1.43051	1.01391e-31	0.453	0.025	6.74818e-36
Macrophage/microglia	H2-D1	1.41292	5.04077e-26	0.884	0.439	3.35492e-30
Macrophage/microglia	Tmcc3	1.39565	1.78854e-18	0.568	0.162	1.19038e-22
Macrophage/microglia	Trf	1.38593	1.36026e-26	0.558	0.085	9.05329e-31
Macrophage/microglia	P2ry12	1.37327	6.45557e-37	0.4	0.002	4.29655e-41
Macrophage/microglia	Cd33	1.37081	8.29779e-36	0.421	0.009	5.52266e-40
Macrophage/microglia	Basp1	1.36648	1.94109e-22	0.432	0.053	1.29191e-26
Macrophage/microglia	Arpc1b	1.36191	1.07107e-24	0.684	0.187	7.12857e-29
Macrophage/microglia	Cd180	1.34629	4.04104e-32	0.358	0.002	2.68954e-36
Macrophage/microglia	Vsir	1.33853	8.14669e-27	0.474	0.051	5.42209e-31
Macrophage/microglia	Cxcl16	1.3145	4.46775e-18	0.389	0.051	2.97354e-22
Macrophage/microglia	Evi2a	1.31006	1.87013e-33	0.432	0.016	1.24468e-37
Macrophage/microglia	Ppfia4	1.27411	4.04039e-31	0.379	0.009	2.68911e-35
Macrophage/microglia	Itgam	1.26134	6.16923e-29	0.326	0.002	4.10598e-33
Macrophage/microglia	Man2b1	1.25367	1.59895e-20	0.379	0.037	1.06419e-24
Macrophage/microglia	Cd84	1.25355	1.47683e-24	0.4	0.03	9.82913e-29
Macrophage/microglia	Ier3	1.25073	4.91706e-10	0.358	0.081	3.27258e-14
Macrophage/microglia	Ptgs1	1.24501	2.46151e-24	0.347	0.016	1.63828e-28
Macrophage/microglia	Lyn	1.23698	2.07809e-31	0.4	0.014	1.38309e-35
Macrophage/microglia	Bcl2a1b	1.21769	2.57824e-26	0.432	0.032	1.71597e-30
Macrophage/microglia	Inpp5d	1.20729	1.1668e-24	0.358	0.018	7.76569e-29
Macrophage/microglia	Hexa	1.20467	3.58897e-12	0.505	0.169	2.38867e-16
Macrophage/microglia	Fcgr1	1.1988	1.43668e-27	0.326	0.005	9.56193e-32
Macrophage/microglia	Ctsa	1.19394	7.56292e-14	0.463	0.118	5.03356e-18
Macrophage/microglia	Cyba	1.19265	2.34795e-16	0.642	0.224	1.56269e-20
Macrophage/microglia	Lcp1	1.17523	5.04727e-19	0.474	0.076	3.35925e-23
Macrophage/microglia	Il21r	1.17258	3.33187e-25	0.347	0.014	2.21755e-29
Macrophage/microglia	Capza2	1.16956	1.12285e-14	0.674	0.303	7.47324e-19
Macrophage/microglia	Fth1	1.16481	4.12697e-24	1	0.942	2.74674e-28
Macrophage/microglia	Lpcat2	1.1495	4.91562e-23	0.316	0.012	3.27163e-27
Macrophage/microglia	Ncf1	1.14363	3.77976e-23	0.305	0.009	2.51565e-27
Macrophage/microglia	Cd52	1.14325	6.74591e-38	0.842	0.132	4.48979e-42
Macrophage/microglia	Srgap2	1.13817	3.97866e-12	0.295	0.042	2.64803e-16
Macrophage/microglia	Gm10116	1.1341	1.76671e-09	0.589	0.273	1.17585e-13
Macrophage/microglia	Adgre1	1.12407	5.63442e-22	0.284	0.007	3.75003e-26
Macrophage/microglia	Abhd12	1.11683	1.89421e-11	0.432	0.12	1.26071e-15
Macrophage/microglia	Snx5	1.11443	6.42969e-12	0.505	0.162	4.27932e-16
Macrophage/microglia	Hck	1.11144	9.93078e-29	0.326	0.002	6.60951e-33
Macrophage/microglia	Creg1	1.10533	1.51878e-11	0.442	0.122	1.01084e-15
Macrophage/microglia	C3ar1	1.10052	5.46743e-21	0.274	0.007	3.63889e-25
Macrophage/microglia	Ifi27l2a	1.09192	5.20589e-09	0.568	0.238	3.46482e-13
Macrophage/microglia	Bmp2k	1.08222	2.07886e-17	0.284	0.018	1.3836e-21
Macrophage/microglia	Plxdc2	1.0817	7.68395e-17	0.337	0.037	5.11411e-21
Macrophage/microglia	Ms4a6c	1.07391	1.01239e-18	0.284	0.014	6.73806e-23
Macrophage/microglia	Hpgd	1.06768	2.98654e-23	0.295	0.007	1.98771e-27
Macrophage/microglia	Gm26916	1.06741	2.39081e-06	0.4	0.143	1.59122e-10
Macrophage/microglia	Anxa3	1.06519	2.67233e-16	0.368	0.048	1.77859e-20
Macrophage/microglia	Pmepa1	1.06217	3.076e-09	0.4	0.115	2.04726e-13
Macrophage/microglia	Cyth4	1.05999	3.00915e-20	0.316	0.018	2.00276e-24
Macrophage/microglia	Rhoh	1.05775	1.73573e-15	0.284	0.023	1.15523e-19
Macrophage/microglia	PISD	1.05388	2.89157e-07	0.516	0.226	1.9245e-11
Macrophage/microglia	Slc11a1	1.04781	1.44194e-26	0.316	0.005	9.59695e-31
Macrophage/microglia	Efhd2	1.04205	5.10496e-13	0.484	0.129	3.39764e-17
Macrophage/microglia	St3gal6	1.04131	5.24292e-15	0.337	0.044	3.48946e-19
Macrophage/microglia	Tgfb1	1.03788	2.29046e-13	0.358	0.06	1.52444e-17
Macrophage/microglia	Tm6sf1	1.0366	1.59249e-16	0.316	0.03	1.05989e-20
Macrophage/microglia	Slco2b1	1.03614	8.44436e-21	0.284	0.009	5.62021e-25
Macrophage/microglia	Epb41l2	1.03432	2.40971e-15	0.379	0.06	1.6038e-19
Macrophage/microglia	Actb	1.03012	5.88775e-17	0.989	0.848	3.91864e-21
Macrophage/microglia	Neat1	1.02163	2.0965e-05	0.537	0.259	1.39534e-09
Macrophage/microglia	Skil	1.02073	2.78427e-06	0.4	0.148	1.85309e-10
Macrophage/microglia	Nfe2l2	1.0181	9.34164e-08	0.389	0.125	6.2174e-12
Macrophage/microglia	Fgd2	1.00915	3.33719e-14	0.347	0.053	2.22109e-18
Macrophage/microglia	Ssh2	1.00839	0.00290269	0.4	0.199	1.93191e-07
Macrophage/microglia	Ptpn18	1.00657	1.07863e-21	0.684	0.162	7.17889e-26

## Sheet: TL
cluster	gene	avg_logFC	p_val_adj	pct.1	pct.2	p_val
T-cell like	Ccl5	4.40113	2.8983e-64	0.905	0.045	1.92898e-68
T-cell like	AW112010	3.0502	4.32853e-47	0.976	0.123	2.88088e-51
T-cell like	Nkg7	2.81016	4.90707e-76	0.762	0.006	3.26593e-80
T-cell like	Ms4a4b	2.67058	6.76028e-75	0.714	0.002	4.49936e-79
T-cell like	Tmsb10	2.50478	5.627e-25	0.976	0.399	3.74509e-29
T-cell like	Gimap4	2.39288	1.07984e-73	0.762	0.008	7.18697e-78
T-cell like	Ptpn22	2.32988	3.21095e-49	0.643	0.021	2.13707e-53
T-cell like	Hcst	2.25612	1.17088e-60	0.714	0.016	7.79289e-65
T-cell like	Ly6c2	2.24211	6.98493e-24	0.405	0.021	4.64888e-28
T-cell like	Cd52	2.2036	6.15207e-31	0.976	0.198	4.09456e-35
T-cell like	Cd3d	2.19654	3.44517e-59	0.619	0.006	2.29296e-63
T-cell like	Rac2	2.16435	1.45814e-43	0.81	0.068	9.70474e-48
T-cell like	Rgs1	2.12227	2.96763e-28	0.5	0.029	1.97513e-32
T-cell like	S100a6	2.11803	7.36369e-29	0.667	0.07	4.90096e-33
T-cell like	Gimap3	2.10068	2.25729e-69	0.667	0.002	1.50236e-73
T-cell like	Cd3g	2.07823	1.21402e-63	0.595	0	8.08001e-68
T-cell like	Ptprc	1.83774	2.20225e-28	0.786	0.111	1.46572e-32
T-cell like	Cxcr6	1.83482	7.22028e-53	0.548	0.004	4.80551e-57
T-cell like	H2-Q7	1.79945	4.15939e-31	0.786	0.103	2.76832e-35
T-cell like	Cd8b1	1.79443	7.62418e-37	0.405	0.004	5.07433e-41
T-cell like	Lck	1.76612	2.9242e-41	0.571	0.021	1.94622e-45
T-cell like	Xcl1	1.76568	1.74682e-28	0.31	0.002	1.16261e-32
T-cell like	Crip1	1.76394	2.26045e-17	0.738	0.185	1.50446e-21
T-cell like	Mndal	1.75599	6.59857e-28	0.571	0.045	4.39173e-32
T-cell like	Cd3e	1.74783	2.57775e-47	0.476	0.002	1.71564e-51
T-cell like	Shisa5	1.72724	1.07752e-14	0.714	0.206	7.17154e-19
T-cell like	Ms4a6b	1.71681	5.28449e-34	0.595	0.037	3.51713e-38
T-cell like	Gm9844	1.70793	1.24956e-22	0.667	0.103	8.31657e-27
T-cell like	Pfn1	1.6955	3.30106e-19	0.976	0.564	2.19704e-23
T-cell like	S100a10	1.68909	5.54741e-20	0.619	0.095	3.69212e-24
T-cell like	Cnn2	1.68503	6.09577e-31	0.595	0.045	4.05709e-35
T-cell like	Bcl2	1.68459	4.32865e-14	0.571	0.111	2.88096e-18
T-cell like	Stk17b	1.67525	1.03863e-39	0.595	0.027	6.91267e-44
T-cell like	Ptprcap	1.67211	2.93821e-47	0.5	0.004	1.95555e-51
T-cell like	Ltb	1.65376	1.34339e-32	0.405	0.008	8.94103e-37
T-cell like	Ctsw	1.6504	3.17309e-47	0.452	0	2.11188e-51
T-cell like	Klrd1	1.6408	3.08185e-29	0.357	0.006	2.05115e-33
T-cell like	Mbnl1	1.63374	9.18312e-19	0.857	0.263	6.11189e-23
T-cell like	Thy1	1.63355	1.08693e-39	0.5	0.012	7.23415e-44
T-cell like	Sh3bgrl3	1.60764	3.15605e-17	0.929	0.414	2.10053e-21
T-cell like	Ptpn18	1.60532	4.2495e-17	0.786	0.21	2.82829e-21
T-cell like	Coro1a	1.59841	2.0442e-24	0.714	0.105	1.36053e-28
T-cell like	Ctla2a	1.59087	4.96289e-32	0.548	0.029	3.30309e-36
T-cell like	Arhgdib	1.57174	2.43316e-21	0.643	0.091	1.61941e-25
T-cell like	Gimap1	1.5691	1.46875e-26	0.405	0.016	9.77538e-31
T-cell like	Cd8a	1.52722	4.82851e-32	0.381	0.006	3.21365e-36
T-cell like	S100a4	1.52528	2.34336e-21	0.381	0.021	1.55964e-25
T-cell like	Ifi203	1.51643	5.94248e-19	0.476	0.047	3.95506e-23
T-cell like	Srgn	1.5066	1.6691e-12	0.5	0.088	1.11088e-16
T-cell like	Lat	1.4967	1.5266e-34	0.405	0.006	1.01604e-38
T-cell like	Actb	1.49268	5.03451e-07	1	0.862	3.35075e-11
T-cell like	Hmgb2	1.47526	1.21148e-06	0.429	0.107	8.06311e-11
T-cell like	Rps24	1.45288	5.95691e-21	1	0.87	3.96467e-25
T-cell like	Txk	1.42846	5.54906e-22	0.405	0.025	3.69322e-26
T-cell like	Cotl1	1.41886	1.01744e-10	0.619	0.167	6.77167e-15
T-cell like	Id2	1.41843	3.58518e-08	0.619	0.198	2.38614e-12
T-cell like	Rps15a	1.39267	1.51832e-19	1	0.907	1.01053e-23
T-cell like	Rps13	1.38114	2.51787e-17	1	0.805	1.67578e-21
T-cell like	Rpl13a	1.37831	5.01363e-21	1	0.92	3.33686e-25
T-cell like	Rpl12	1.37228	5.82106e-16	0.976	0.72	3.87425e-20
T-cell like	Lgals1	1.35205	0.00328024	0.405	0.134	2.18319e-07
T-cell like	Lcp1	1.35121	2.85723e-17	0.643	0.105	1.90165e-21
T-cell like	Btg1	1.33338	0.000195629	0.738	0.457	1.30203e-08
T-cell like	Rpl18a	1.3298	1.55622e-17	1	0.858	1.03575e-21
T-cell like	Sp100	1.32535	5.33333e-21	0.524	0.053	3.54963e-25
T-cell like	Rps27rt	1.3242	3.95712e-21	1	0.953	2.63369e-25
T-cell like	Lsp1	1.311	5.56591e-19	0.452	0.041	3.70443e-23
T-cell like	Psmb8	1.29451	1.91652e-14	0.69	0.165	1.27556e-18
T-cell like	Rpl13a-ps1	1.29111	1.2606e-11	0.786	0.333	8.39004e-16
T-cell like	Cd28	1.25916	1.79071e-36	0.357	0	1.19182e-40
T-cell like	Il2rb	1.25218	3.79454e-39	0.381	0	2.52549e-43
T-cell like	Rps18	1.24595	2.24452e-17	0.976	0.862	1.49386e-21
T-cell like	Rinl	1.23243	2.50618e-18	0.381	0.027	1.66801e-22
T-cell like	Skap1	1.23017	4.92565e-15	0.31	0.021	3.27831e-19
T-cell like	Akna	1.22723	2.3304e-14	0.476	0.066	1.55101e-18
T-cell like	Rps18-ps3	1.22009	1.55826e-12	0.905	0.475	1.03711e-16
T-cell like	Gimap6	1.21973	5.15305e-24	0.452	0.027	3.42965e-28
T-cell like	Cd27	1.20544	0.000211051	0.476	0.156	1.40467e-08
T-cell like	Tmsb4x	1.20426	2.68141e-13	1	0.819	1.78463e-17
T-cell like	Rpl32	1.20349	4.77648e-19	1	0.905	3.17902e-23
T-cell like	Sp110	1.19557	8.92383e-15	0.5	0.07	5.93932e-19
T-cell like	Rps16	1.18872	2.01664e-17	1	0.87	1.34219e-21
T-cell like	Rps7	1.18741	6.06848e-13	1	0.796	4.03892e-17
T-cell like	Gm9493	1.18082	1.14264e-09	0.905	0.673	7.60495e-14
T-cell like	Rps27	1.17967	8.06012e-11	0.905	0.578	5.36447e-15
T-cell like	Gm11808	1.17225	5.90584e-10	0.881	0.591	3.93068e-14
T-cell like	Selplg	1.16582	3.33776e-13	0.595	0.111	2.22147e-17
T-cell like	Rpl18	1.16168	2.31573e-09	0.929	0.704	1.54125e-13
T-cell like	Uba52	1.16019	3.34847e-14	0.976	0.716	2.2286e-18
T-cell like	Plac8	1.15908	1.8159e-20	0.31	0.01	1.20858e-24
T-cell like	Rpsa	1.15743	1.53614e-16	1	0.706	1.02239e-20
T-cell like	Rps11	1.15628	4.53411e-16	1	0.887	3.01771e-20
T-cell like	Eif3e	1.15483	2.7393e-10	0.762	0.321	1.82316e-14
T-cell like	Runx3	1.15381	7.80415e-25	0.333	0.008	5.19411e-29
T-cell like	Rps5	1.15336	6.02325e-13	0.976	0.772	4.00882e-17
T-cell like	S100a11	1.15006	9.62266e-12	0.69	0.193	6.40443e-16
T-cell like	Nabp1	1.14208	1.79704e-05	0.333	0.07	1.19603e-09
T-cell like	Tbc1d10c	1.13827	3.9072e-19	0.262	0.006	2.60047e-23
T-cell like	Bcl11b	1.13399	1.58668e-26	0.333	0.006	1.05603e-30
T-cell like	Sept1	1.13232	5.78593e-07	0.333	0.056	3.85087e-11
T-cell like	Fgl2	1.132	4.65403e-09	0.31	0.037	3.09753e-13
T-cell like	Rpl17	1.1307	2.46186e-15	1	0.868	1.63851e-19
T-cell like	Samsn1	1.11785	3.67083e-08	0.31	0.041	2.44315e-12
T-cell like	Gpsm3	1.11731	2.93099e-16	0.452	0.049	1.95074e-20
T-cell like	Cst7	1.11255	5.06733e-22	0.31	0.008	3.3726e-26
T-cell like	Wdr89	1.11014	4.31198e-17	1	0.862	2.86987e-21
T-cell like	Rbm3	1.11002	5.58935e-05	0.619	0.29	3.72003e-09
T-cell like	Abracl	1.10545	1.45456e-05	0.381	0.088	9.68093e-10
T-cell like	Rpl27	1.10207	2.19461e-12	0.976	0.71	1.46064e-16
T-cell like	Gnb2l1	1.10107	1.08336e-05	0.786	0.537	7.21041e-10
T-cell like	Gimap5	1.09511	7.068e-20	0.286	0.008	4.70416e-24
T-cell like	Psmb9	1.09208	1.62001e-06	0.452	0.113	1.07821e-10
T-cell like	Rps3	1.0839	1.09728e-11	0.976	0.821	7.30302e-16
T-cell like	Gm4955	1.08071	2.39087e-13	0.286	0.019	1.59126e-17
T-cell like	Rpl4	1.07179	9.13562e-10	0.905	0.726	6.08028e-14
T-cell like	Gm9843	1.06897	2.35661e-11	0.976	0.681	1.56846e-15
T-cell like	Il2rg	1.06809	1.00996e-13	0.31	0.023	6.72188e-18
T-cell like	Rpl22	1.06576	1.33973e-11	0.952	0.704	8.91667e-16
T-cell like	Rpl10a	1.06559	1.78254e-06	0.905	0.7	1.18638e-10
T-cell like	Rpl19	1.06092	9.23036e-14	1	0.844	6.14333e-18
T-cell like	Ankrd44	1.05907	0.00219612	0.476	0.177	1.46164e-07
T-cell like	B4galnt1	1.05694	4.09102e-10	0.31	0.033	2.72281e-14
T-cell like	Rps15	1.05441	2.19119e-14	1	0.879	1.45836e-18
T-cell like	Rpl34	1.05439	2.29299e-15	1	0.866	1.52611e-19
T-cell like	Akap13	1.05165	0.000178238	0.524	0.193	1.18628e-08
T-cell like	Rps23	1.05018	1.32426e-16	1	0.92	8.81368e-21
T-cell like	Fxyd5	1.04831	1.20228e-14	0.452	0.053	8.00185e-19
T-cell like	H2-K1	1.04824	2.60395e-09	0.905	0.496	1.73308e-13
T-cell like	Rps3a1	1.04648	4.14359e-14	0.976	0.821	2.7578e-18
T-cell like	Epsti1	1.04022	8.04753e-06	0.31	0.053	5.3561e-10
T-cell like	Rpl39	1.03458	7.89361e-17	1	0.975	5.25365e-21
T-cell like	Rplp2	1.03043	2.45165e-10	0.905	0.681	1.63172e-14
T-cell like	Rps19	1.02862	1.41541e-11	0.976	0.874	9.42038e-16
T-cell like	Rps6	1.02585	8.96826e-12	0.976	0.8	5.96889e-16
T-cell like	Zyx	1.01522	6.08102e-06	0.31	0.056	4.04727e-10
T-cell like	Rpl27-ps3	1.01515	3.2208e-09	0.905	0.681	2.14363e-13
T-cell like	Itgal	1.01435	4.79749e-16	0.262	0.01	3.193e-20
T-cell like	Rps10	1.00687	2.32098e-12	0.976	0.813	1.54474e-16
T-cell like	Rpl3	1.00543	1.36278e-11	0.952	0.728	9.07008e-16
T-cell like	Rps4x	1.0029	3.48434e-12	0.976	0.835	2.31903e-16
T-cell like	Wipf1	1.00058	7.83573e-11	0.405	0.058	5.21513e-15

## Sheet: EL
cluster	gene	avg_logFC	p_val_adj	pct.1	pct.2	p_val
epithelial-like cells	Lcn2	2.867	3.31711e-79	0.913	0.012	2.20773e-83
epithelial-like cells	Cyp2f2	2.62571	1.91079e-77	0.87	0.01	1.27174e-81
epithelial-like cells	Mia	2.49423	2.15533e-17	0.957	0.234	1.4345e-21
epithelial-like cells	Gstm1	2.14161	3.69087e-15	0.957	0.251	2.45648e-19
epithelial-like cells	Ednrb	1.8871	4.83826e-41	0.652	0.02	3.22014e-45
epithelial-like cells	Krt18	1.78025	1.73579e-45	0.783	0.03	1.15527e-49
epithelial-like cells	Plat	1.75325	7.18695e-38	0.696	0.028	4.78333e-42
epithelial-like cells	Atp1b1	1.68137	6.94338e-08	0.739	0.208	4.62122e-12
epithelial-like cells	Krt8	1.67146	6.97814e-25	0.565	0.032	4.64435e-29
epithelial-like cells	Rbpms	1.63347	1.0897e-42	0.565	0.01	7.25255e-47
epithelial-like cells	Tm4sf1	1.62665	1.2665e-30	0.696	0.04	8.42929e-35
epithelial-like cells	Clu	1.59909	5.12024e-09	0.826	0.236	3.40782e-13
epithelial-like cells	Cldn3	1.58954	2.36258e-10	0.522	0.069	1.57243e-14
epithelial-like cells	Tmem30b	1.53509	6.12261e-19	0.609	0.053	4.07495e-23
epithelial-like cells	Pbxip1	1.53348	2.083e-06	0.783	0.275	1.38636e-10
epithelial-like cells	Ifitm3	1.50915	5.46096e-09	0.957	0.352	3.63458e-13
epithelial-like cells	Folr1	1.45169	1.09312e-46	0.478	0.002	7.27537e-51
epithelial-like cells	Ly6a	1.44945	2.9599e-08	0.565	0.091	1.96998e-12
epithelial-like cells	Cryab	1.44142	7.78178e-24	0.565	0.032	5.17922e-28
epithelial-like cells	Epcam	1.43826	2.45714e-12	0.783	0.143	1.63537e-16
epithelial-like cells	Gm15698	1.42892	1.42316e-26	0.261	0	9.47193e-31
epithelial-like cells	Por	1.42814	9.88713e-13	0.609	0.079	6.58046e-17
epithelial-like cells	Mt2	1.4194	2.63079e-05	0.957	0.451	1.75094e-09
epithelial-like cells	S100a6	1.39997	1.56402e-11	0.652	0.093	1.04094e-15
epithelial-like cells	Mgst1	1.3996	2.58433e-08	0.696	0.156	1.72002e-12
epithelial-like cells	Pla2g7	1.36879	5.14341e-14	0.652	0.085	3.42323e-18
epithelial-like cells	Aldoc	1.36599	9.96853e-07	0.826	0.257	6.63463e-11
epithelial-like cells	Six6	1.35654	2.44405e-09	0.652	0.123	1.62665e-13
epithelial-like cells	Spint2	1.31872	0.00068848	0.696	0.265	4.58223e-08
epithelial-like cells	Ahnak	1.29856	5.99939e-24	0.783	0.071	3.99294e-28
epithelial-like cells	Gclc	1.28509	2.80708e-09	0.522	0.075	1.86827e-13
epithelial-like cells	Anxa2	1.27214	1.0576e-06	0.783	0.244	7.03892e-11
epithelial-like cells	App	1.26469	1.10228e-06	0.913	0.354	7.33628e-11
epithelial-like cells	Tmem176b	1.24899	3.0087e-05	0.913	0.448	2.00246e-09
epithelial-like cells	Slc16a11	1.24778	6.69157e-21	0.391	0.014	4.45362e-25
epithelial-like cells	Ece1	1.24518	1.00094e-05	0.609	0.145	6.66183e-10
epithelial-like cells	S100a10	1.24454	1.7359e-09	0.652	0.113	1.15534e-13
epithelial-like cells	Ly6e	1.23451	7.19904e-06	0.957	0.614	4.79137e-10
epithelial-like cells	Pax6	1.22128	1.18402e-20	0.565	0.04	7.8803e-25
epithelial-like cells	Hspb1	1.19817	1.11965e-05	0.783	0.246	7.45188e-10
epithelial-like cells	S100a11	1.19621	1.403e-07	0.783	0.208	9.33776e-12
epithelial-like cells	Fam107a	1.19561	7.72927e-18	0.522	0.038	5.14427e-22
epithelial-like cells	Tpm1	1.19548	4.02085e-05	0.609	0.162	2.67611e-09
epithelial-like cells	Cldn7	1.18831	4.36425e-24	0.478	0.02	2.90466e-28
epithelial-like cells	Ltbp4	1.16974	1.76955e-19	0.478	0.028	1.17773e-23
epithelial-like cells	Six1	1.15604	0.000113831	0.435	0.083	7.57609e-09
epithelial-like cells	Ly6h	1.1558	1.07547e-05	0.783	0.251	7.15787e-10
epithelial-like cells	Cpxm2	1.13936	1.37374e-16	0.435	0.026	9.14301e-21
epithelial-like cells	Sdc4	1.1246	2.64967e-05	0.739	0.236	1.76351e-09
epithelial-like cells	Thsd4	1.12134	1.55065e-20	0.304	0.006	1.03205e-24
epithelial-like cells	Rbp1	1.10464	6.49367e-08	0.565	0.093	4.32191e-12
epithelial-like cells	Igfbp5	1.09342	0.0407434	0.913	0.412	2.71171e-06
epithelial-like cells	Ces1d	1.09046	1.17599e-25	0.478	0.018	7.8269e-30
epithelial-like cells	Pitx2	1.07711	6.53603e-10	0.478	0.059	4.3501e-14
epithelial-like cells	Slc15a2	1.07307	1.60047e-12	0.478	0.046	1.06521e-16
epithelial-like cells	Spint1	1.05754	0.0078796	0.348	0.067	5.24432e-07
epithelial-like cells	Rhou	1.03392	1.60231e-13	0.478	0.042	1.06643e-17
epithelial-like cells	Cntn1	1.03012	0.0143269	0.348	0.067	9.53535e-07
epithelial-like cells	Cnn3	1.02529	0.00103931	0.652	0.222	6.91718e-08
epithelial-like cells	Phgdh	1.01732	2.73807e-05	0.348	0.046	1.82234e-09
epithelial-like cells	Aplp2	1.00146	0.0408206	0.652	0.269	2.71685e-06

## Sheet: VE
cluster	gene	avg_logFC	p_val_adj	pct.1	pct.2	p_val
vascular endothelia	Emcn	3.17439	1.81983e-77	0.923	0.008	1.2112e-81
vascular endothelia	Egfl7	3.09402	1.03774e-63	1	0.019	6.90673e-68
vascular endothelia	Ly6c1	3.07759	1.40085e-60	0.846	0.012	9.32349e-65
vascular endothelia	Plpp1	2.98014	4.35115e-39	0.846	0.029	2.89594e-43
vascular endothelia	Kdr	2.97477	1.03675e-61	0.923	0.016	6.90015e-66
vascular endothelia	Plvap	2.71478	2.04699e-68	0.923	0.012	1.36239e-72
vascular endothelia	Igfbp3	2.68168	2.01263e-52	0.769	0.012	1.33952e-56
vascular endothelia	Flt1	2.63527	6.0222e-69	0.846	0.008	4.00812e-73
vascular endothelia	Plpp3	2.5203	1.21506e-17	1	0.124	8.08694e-22
vascular endothelia	Ly6a	2.51689	8.36842e-23	1	0.089	5.56967e-27
vascular endothelia	Ctla2a	2.47567	8.66612e-26	0.846	0.05	5.7678e-30
vascular endothelia	Id3	2.444	4.37456e-58	0.923	0.017	2.91152e-62
vascular endothelia	Sgk1	2.43503	5.43948e-28	0.923	0.058	3.62029e-32
vascular endothelia	Nrp1	2.4306	1.82797e-16	0.846	0.089	1.21662e-20
vascular endothelia	Eng	2.38091	1.26343e-64	0.923	0.014	8.40888e-69
vascular endothelia	Col4a1	2.3107	2.29367e-37	0.769	0.023	1.52657e-41
vascular endothelia	Ptprb	2.29484	3.40019e-62	0.692	0.004	2.26302e-66
vascular endothelia	Itm2a	2.2698	1.14904e-22	0.615	0.027	7.64754e-27
vascular endothelia	Slc9a3r2	2.22525	7.47233e-51	0.923	0.023	4.97327e-55
vascular endothelia	Fabp4	2.18973	4.17636e-41	0.385	0	2.77961e-45
vascular endothelia	Meis2	2.147	7.40594e-08	0.692	0.111	4.92908e-12
vascular endothelia	Cd24a	2.14039	4.87659e-09	0.846	0.155	3.24565e-13
vascular endothelia	Tm4sf1	2.11413	1.02181e-25	0.846	0.049	6.80072e-30
vascular endothelia	Apold1	2.10701	5.57863e-24	0.538	0.017	3.7129e-28
vascular endothelia	Rgs5	2.10102	5.19543e-32	0.462	0.006	3.45786e-36
vascular endothelia	Nrp2	2.02858	9.98661e-10	0.462	0.035	6.64666e-14
vascular endothelia	Esam	1.97432	1.69496e-60	0.769	0.008	1.12809e-64
vascular endothelia	Adgrl4	1.9637	1.31207e-67	0.615	0	8.73258e-72
vascular endothelia	Clec2d	1.93047	8.57734e-08	0.615	0.082	5.70871e-12
vascular endothelia	Tie1	1.91279	2.99076e-48	0.615	0.006	1.99052e-52
vascular endothelia	Col4a2	1.90129	2.97962e-32	0.615	0.016	1.98311e-36
vascular endothelia	Cd200	1.89922	2.0893e-14	0.692	0.062	1.39055e-18
vascular endothelia	Adgrf5	1.87188	1.50745e-18	0.615	0.035	1.0033e-22
vascular endothelia	Podxl	1.86528	1.68147e-24	0.692	0.033	1.11912e-28
vascular endothelia	Cyr61	1.83802	0.0114151	0.538	0.111	7.59743e-07
vascular endothelia	Epas1	1.80896	0.000906837	0.462	0.072	6.03552e-08
vascular endothelia	Gpihbp1	1.80642	4.17636e-41	0.385	0	2.77961e-45
vascular endothelia	Plk2	1.80251	8.51958e-10	0.538	0.05	5.67027e-14
vascular endothelia	Cyyr1	1.79013	4.17636e-41	0.385	0	2.77961e-45
vascular endothelia	Prss23	1.78988	1.68901e-19	0.462	0.016	1.12414e-23
vascular endothelia	Ramp2	1.77677	6.11636e-39	0.692	0.016	4.07079e-43
vascular endothelia	Tinagl1	1.77406	2.53821e-42	0.462	0.002	1.68932e-46
vascular endothelia	Clec1a	1.76905	3.96433e-40	0.538	0.006	2.63849e-44
vascular endothelia	Cd34	1.71022	8.0873e-48	0.692	0.01	5.38256e-52
vascular endothelia	Rapgef4	1.70568	1.4011e-07	0.538	0.064	9.3251e-12
vascular endothelia	Sox18	1.69994	9.56398e-59	0.538	0	6.36538e-63
vascular endothelia	Fam167b	1.67784	1.52042e-06	0.308	0.019	1.01192e-10
vascular endothelia	Tsc22d1	1.65369	0.00166222	0.846	0.315	1.10631e-07
vascular endothelia	BC028528	1.65306	0.000180875	0.462	0.066	1.20382e-08
vascular endothelia	Mgll	1.64773	0.0110756	0.385	0.058	7.37142e-07
vascular endothelia	Clec14a	1.64334	3.96433e-40	0.538	0.006	2.63849e-44
vascular endothelia	Timp3	1.63622	4.92026e-05	1	0.322	3.27471e-09
vascular endothelia	Exoc3l2	1.63305	1.26244e-36	0.462	0.004	8.40224e-41
vascular endothelia	Cd93	1.62381	1.23203e-33	0.385	0.002	8.19986e-38
vascular endothelia	Ehd4	1.61928	7.06479e-10	0.692	0.085	4.70202e-14
vascular endothelia	Elk3	1.60653	9.34226e-06	0.615	0.103	6.21781e-10
vascular endothelia	Ets1	1.60634	3.50731e-10	0.538	0.047	2.33431e-14
vascular endothelia	Col15a1	1.60484	1.11489e-29	0.615	0.017	7.42023e-34
vascular endothelia	Dusp3	1.60264	0.000242674	0.538	0.093	1.61513e-08
vascular endothelia	1810011O10Rik	1.5807	3.29312e-19	0.462	0.016	2.19176e-23
vascular endothelia	Tnfaip2	1.57364	6.42307e-12	0.538	0.039	4.27492e-16
vascular endothelia	Igfbp7	1.56383	4.91377e-10	0.385	0.021	3.27039e-14
vascular endothelia	Vamp5	1.55584	7.48459e-11	0.538	0.045	4.98142e-15
vascular endothelia	Arhgap31	1.54639	4.58284e-12	0.769	0.089	3.05014e-16
vascular endothelia	Dlc1	1.53018	2.08612e-07	0.615	0.083	1.38844e-11
vascular endothelia	Ifi203	1.5226	2.00898e-08	0.615	0.068	1.33709e-12
vascular endothelia	Fli1	1.51651	7.27199e-13	0.692	0.066	4.83993e-17
vascular endothelia	Cdh5	1.50749	1.94023e-28	0.462	0.008	1.29134e-32
vascular endothelia	Gimap6	1.50516	5.69821e-18	0.692	0.045	3.79249e-22
vascular endothelia	Ldb2	1.5046	3.14265e-09	0.462	0.037	2.09161e-13
vascular endothelia	Kctd12b	1.48099	3.70344e-08	0.385	0.027	2.46485e-12
vascular endothelia	Prkcdbp	1.46246	0.00781468	0.385	0.056	5.20112e-07
vascular endothelia	Lmo2	1.44288	1.49185e-07	0.538	0.06	9.9291e-12
vascular endothelia	Klf2	1.39623	8.26193e-06	0.385	0.035	5.49879e-10
vascular endothelia	Mmrn2	1.38905	6.05345e-36	0.538	0.008	4.02892e-40
vascular endothelia	Eva1b	1.38651	3.9608e-09	0.538	0.052	2.63614e-13
vascular endothelia	Cmtm8	1.3818	0.00698098	0.385	0.056	4.64624e-07
vascular endothelia	Klf4	1.36289	0.00584707	0.385	0.052	3.89156e-07
vascular endothelia	Grrp1	1.36177	4.17636e-41	0.385	0	2.77961e-45
vascular endothelia	Smco4	1.36017	7.21635e-05	0.615	0.111	4.8029e-09
vascular endothelia	Ndrg1	1.36011	0.00213873	0.308	0.031	1.42345e-07
vascular endothelia	Plscr2	1.35313	3.42578e-12	0.462	0.027	2.28005e-16
vascular endothelia	Tek	1.34948	3.59472e-25	0.308	0.002	2.39249e-29
vascular endothelia	Hspg2	1.33526	3.98741e-12	0.385	0.017	2.65385e-16
vascular endothelia	Cav1	1.32989	2.63889e-20	0.308	0.004	1.75633e-24
vascular endothelia	Fam101b	1.32266	2.09886e-07	0.538	0.06	1.39691e-11
vascular endothelia	Mef2c	1.32197	0.0245011	0.692	0.19	1.63069e-06
vascular endothelia	Cd300lg	1.3174	2.52819e-32	0.308	0	1.68266e-36
vascular endothelia	Btnl9	1.31015	3.59472e-25	0.308	0.002	2.39249e-29
vascular endothelia	Rhob	1.30141	0.0220478	0.615	0.157	1.46741e-06
vascular endothelia	Tagln2	1.28721	0.000884001	0.538	0.091	5.88354e-08
vascular endothelia	Slc43a3	1.27989	9.06187e-15	0.385	0.014	6.0312e-19
vascular endothelia	Clic4	1.27889	4.31544e-05	0.538	0.082	2.87218e-09
vascular endothelia	Tax1bp3	1.27039	4.32995e-15	0.538	0.031	2.88183e-19
vascular endothelia	Sept4	1.26557	0.00329003	0.462	0.074	2.18971e-07
vascular endothelia	Cyp26b1	1.26211	6.11856e-17	0.308	0.006	4.07225e-21
vascular endothelia	Aqp1	1.25259	2.92607e-20	0.308	0.004	1.94746e-24
vascular endothelia	Hlx	1.25188	4.08469e-12	0.308	0.01	2.7186e-16
vascular endothelia	Robo4	1.24792	2.52819e-32	0.308	0	1.68266e-36
vascular endothelia	Klf7	1.24532	0.00223264	0.615	0.142	1.48595e-07
vascular endothelia	Mndal	1.24198	6.23493e-05	0.538	0.076	4.14971e-09
vascular endothelia	Bvht	1.2388	2.71015e-12	0.308	0.01	1.80376e-16
vascular endothelia	Crip2	1.23365	0.000112642	0.769	0.177	7.49695e-09
vascular endothelia	Kitl	1.22806	4.68423e-10	0.385	0.021	3.11762e-14
vascular endothelia	Crim1	1.21913	0.00109245	0.462	0.07	7.2709e-08
vascular endothelia	Ltbp1	1.20377	2.11521e-09	0.308	0.014	1.40779e-13
vascular endothelia	Kank3	1.20278	2.70069e-28	0.385	0.004	1.79747e-32
vascular endothelia	Cdc42ep2	1.20263	3.07477e-21	0.385	0.008	2.04644e-25
vascular endothelia	Ramp3	1.19286	5.5996e-17	0.308	0.006	3.72685e-21
vascular endothelia	Rassf3	1.19024	6.65918e-06	0.385	0.035	4.43206e-10
vascular endothelia	Erg	1.18844	2.40874e-14	0.308	0.008	1.60315e-18
vascular endothelia	Irx3	1.18674	2.52819e-32	0.308	0	1.68266e-36
vascular endothelia	Lims2	1.18176	4.46224e-14	0.308	0.008	2.96987e-18
vascular endothelia	Peak1	1.16903	1.0366e-10	0.462	0.031	6.89918e-15
vascular endothelia	AU021092	1.16857	2.52819e-32	0.308	0	1.68266e-36
vascular endothelia	Bgn	1.14403	4.37273e-12	0.308	0.01	2.9103e-16
vascular endothelia	Tspan18	1.13138	7.26416e-21	0.385	0.008	4.83471e-25
vascular endothelia	Mapk3	1.12387	0.0496505	0.538	0.13	3.30453e-06
vascular endothelia	Abcg2	1.11234	0.00372364	0.308	0.033	2.4783e-07
vascular endothelia	Srgn	1.10846	0.00074157	0.615	0.109	4.93558e-08
vascular endothelia	Lgals9	1.10016	4.77105e-05	0.385	0.039	3.1754e-09
vascular endothelia	Arap3	1.0938	3.56358e-12	0.308	0.01	2.37177e-16
vascular endothelia	Stard8	1.08263	0.000372651	0.385	0.043	2.48021e-08
vascular endothelia	Ecscr	1.06864	2.50152e-09	0.308	0.014	1.66491e-13
vascular endothelia	Icam2	1.06499	2.63889e-20	0.308	0.004	1.75633e-24
vascular endothelia	Rgl1	1.04293	0.00959833	0.308	0.035	6.38824e-07
vascular endothelia	Tmod3	1.03421	0.0432323	0.308	0.039	2.87736e-06
vascular endothelia	Spry4	1.02692	2.36562e-09	0.308	0.014	1.57445e-13
vascular endothelia	Mcam	1.02691	3.51404e-08	0.308	0.016	2.3388e-12
vascular endothelia	Mcl1	1.01923	0.0461407	0.615	0.157	3.07093e-06
vascular endothelia	Dip2b	1.01753	0.0381731	0.462	0.089	2.54064e-06
vascular endothelia	Ube2l6	1.0151	0.020505	0.308	0.037	1.36472e-06
vascular endothelia	Clic5	1.00824	3.59472e-25	0.308	0.002	2.39249e-29

## Sheet: VLMC
cluster	gene	avg_logFC	p_val_adj	pct.1	pct.2	p_val
VLMC	Dcn	4.28863	7.13554e-18	0.545	0.023	4.74911e-22
VLMC	Apod	4.07912	1.29945e-30	0.727	0.023	8.64857e-35
VLMC	Lum	4.004	2.92413e-34	0.455	0.004	1.94618e-38
VLMC	Mgp	3.6832	3.41418e-08	0.545	0.052	2.27233e-12
VLMC	Itih5	3.32797	1.02839e-22	0.636	0.025	6.84451e-27
VLMC	Efemp1	2.9626	3.2637e-31	0.636	0.015	2.17218e-35
VLMC	Col1a2	2.71854	1.68822e-18	0.636	0.033	1.12361e-22
VLMC	Crispld2	2.68183	0.00233771	0.273	0.021	1.55588e-07
VLMC	Spp1	2.67704	8.35149e-26	0.455	0.008	5.5584e-30
VLMC	S100b	2.52213	5.02236e-44	0.545	0.004	3.34267e-48
VLMC	Ogn	2.52117	5.52755e-61	0.636	0.002	3.6789e-65
VLMC	Col1a1	2.44864	2.83563e-20	0.636	0.029	1.88727e-24
VLMC	Cped1	2.26487	6.19295e-10	0.636	0.064	4.12177e-14
VLMC	Serping1	2.20014	4.30857e-22	0.545	0.017	2.8676e-26
VLMC	Pdgfra	2.13793	1.17651e-59	0.545	0	7.83034e-64
VLMC	Bgn	2.09541	3.21898e-15	0.364	0.01	2.14241e-19
VLMC	Cemip	2.03067	8.89666e-25	0.364	0.004	5.92124e-29
VLMC	Cfh	1.99665	7.5842e-05	0.455	0.05	5.04772e-09
VLMC	Cldn11	1.97646	2.15608e-30	0.364	0.002	1.43499e-34
VLMC	Pcolce	1.94327	4.62144e-12	0.455	0.023	3.07583e-16
VLMC	Sfrp4	1.94161	2.15608e-30	0.364	0.002	1.43499e-34
VLMC	Cnp	1.92854	4.524e-06	0.545	0.064	3.01098e-10
VLMC	Col3a1	1.91676	8.72812e-44	0.545	0.004	5.80906e-48
VLMC	Cryab	1.89461	1.64039e-05	0.455	0.046	1.09177e-09
VLMC	Dpep1	1.83043	1.7248e-20	0.273	0.002	1.14795e-24
VLMC	Inmt	1.82674	1.01409e-15	0.273	0.004	6.74938e-20
VLMC	Igfbp6	1.81739	8.34478e-39	0.364	0	5.55393e-43
VLMC	Colec12	1.76844	1.7248e-20	0.273	0.002	1.14795e-24
VLMC	Igfbp7	1.71795	5.3481e-07	0.364	0.023	3.55947e-11
VLMC	Slc4a10	1.71238	0.00233771	0.273	0.021	1.55588e-07
VLMC	Plpp3	1.69302	0.011412	0.636	0.135	7.59532e-07
VLMC	Lama2	1.69142	2.89191e-30	0.364	0.002	1.92473e-34
VLMC	Hpca	1.6552	1.7248e-20	0.273	0.002	1.14795e-24
VLMC	Il33	1.63264	1.65634e-08	0.273	0.01	1.10239e-12
VLMC	Cdh11	1.61846	1.70866e-12	0.273	0.006	1.13721e-16
VLMC	Cpxm1	1.61632	6.32059e-13	0.455	0.021	4.20672e-17
VLMC	Thbd	1.5774	3.00312e-15	0.455	0.017	1.99875e-19
VLMC	Gng11	1.56344	0.00183444	0.636	0.133	1.22092e-07
VLMC	Lbp	1.51849	7.94655e-13	0.455	0.021	5.28889e-17
VLMC	Aspa	1.51552	2.15608e-30	0.364	0.002	1.43499e-34
VLMC	Tmem100	1.49218	1.35136e-09	0.364	0.017	8.99409e-14
VLMC	Cygb	1.48613	1.54667e-08	0.273	0.01	1.0294e-12
VLMC	Aebp1	1.45299	1.7248e-20	0.273	0.002	1.14795e-24
VLMC	Calu	1.44769	0.000119181	0.545	0.079	7.93216e-09
VLMC	Nbl1	1.42022	9.17996e-08	0.364	0.021	6.10979e-12
VLMC	Matn2	1.39961	9.95702e-05	0.364	0.031	6.62697e-09
VLMC	Id1	1.38278	6.12907e-06	0.273	0.014	4.07925e-10
VLMC	Col18a1	1.36395	0.0111638	0.364	0.044	7.43014e-07
VLMC	Phldb2	1.35299	2.04703e-10	0.455	0.027	1.36242e-14
VLMC	Anks1b	1.35132	0.00816391	0.273	0.023	5.43355e-07
VLMC	Fkbp9	1.33978	0.00473778	0.545	0.097	3.15326e-07
VLMC	Fbln1	1.33884	0.00151346	0.364	0.037	1.00729e-07
VLMC	Tril	1.3191	0.000178178	0.273	0.017	1.18588e-08
VLMC	Foxc1	1.31294	5.11007e-07	0.364	0.023	3.40104e-11
VLMC	Cald1	1.30244	0.0476306	0.636	0.147	3.17009e-06
VLMC	Nr2f2	1.29976	0.0106944	0.455	0.07	7.11772e-07
VLMC	Tspan2	1.29554	0.00344166	0.273	0.021	2.29062e-07
VLMC	Sulf2	1.27719	1.35319e-11	0.455	0.023	9.00622e-16
VLMC	Nid1	1.25853	3.79404e-07	0.273	0.012	2.52515e-11
VLMC	Sept8	1.25154	0.0269662	0.364	0.046	1.79475e-06
VLMC	Serpinf1	1.24849	1.58826e-09	0.455	0.029	1.05708e-13
VLMC	Mfap4	1.23208	2.60434e-20	0.273	0.002	1.73334e-24
VLMC	Emp3	1.22595	1.50009e-05	0.545	0.066	9.98398e-10
VLMC	P2ry1	1.20989	2.7361e-15	0.364	0.01	1.82103e-19
VLMC	Ramp2	1.20721	2.30095e-11	0.455	0.023	1.53142e-15
VLMC	Sox10	1.18755	8.34478e-39	0.364	0	5.55393e-43
VLMC	Cmtm5	1.15639	2.02347e-28	0.273	0	1.34673e-32
VLMC	Ank2	1.11489	0.0251575	0.545	0.11	1.67438e-06
VLMC	Smtn	1.08779	3.96487e-06	0.273	0.014	2.63885e-10
VLMC	Col6a1	1.07796	2.02347e-28	0.273	0	1.34673e-32
VLMC	Loxl2	1.07169	3.00077e-05	0.273	0.015	1.99718e-09
VLMC	Gjc3	1.0462	1.01409e-15	0.273	0.004	6.74938e-20
VLMC	Nupr1	1.00805	0.00846348	0.273	0.023	5.63294e-07
VLMC	Zic1	1.00709	1.9791e-20	0.273	0.002	1.3172e-24
